# Supplementary material
Source: PubMed Central journal article supplement (PMC3538948)
Supplement: NIHMS420744-supplement-1.pdf [file NIHMS420744-supplement-1.pdf]

| Probe Set ID | Gene Title                                  | Gene Symbol | Test= IL3+IL33 signal / Control=IL3+ signal | FDR corrected p-value |
|--------------|---------------------------------------------|-------------|---------------------------------------------|-----------------------|
| 1420370_s_at | casein beta                                 | Csn2        | 3114.51                                     | 2.64E-17              |
| 1417025_at   | histocompatibility 2, class II antigen E b  | H2-Eb1      | 1160.37                                     | 4.37E-20              |
| 1420369_a_at | casein beta                                 | Csn2        | 749.15                                      | 2.28E-17              |
| 1452431_s_at | histocompatibility 2, class II antigen A, a | H2-Aa       | 438.84                                      | 6.02E-22              |
| 1418095_at   | small muscle protein, X-linked              | Smpx        | -413.46                                     | 6.22E-12              |
| 1425519_a_at | CD74 antigen (invariant polypeptide of n    | Cd74        | 332.90                                      | 4.80E-17              |
| 1435290_x_at | histocompatibility 2, class II antigen A, a | H2-Aa       | 325.85                                      | 4.11E-18              |
| 1425528_at   | paired related homeobox 1                   | Prrx1       | -287.05                                     | 3.98E-10              |
| 1423231_at   | neurogranin                                 | Nrgn        | -257.38                                     | 6.06E-14              |
| 1420544_at   | germinal center expressed transcript 2      | Gcet2       | -197.50                                     | 1.53E-13              |
| 1427345_a_at | sulfotransferase family 1A, phenol-prefer   | Sult1a1     | -169.02                                     | 8.23E-11              |
| 1448925_at   | twist homolog 2 (Drosophila)                | Twist2      | -138.26                                     | 1.57E-11              |
| 1428034_a_at | tumor necrosis factor receptor superfamil   | Tnfrsf9     | 126.90                                      | 2.91E-10              |
| 1435172_at   | eomesodermin homolog (Xenopus laevis)       | Eomes       | -113.24                                     | 1.16E-11              |
| 1420627_a_at | casein alpha s1                             | Csn1s1      | 108.83                                      | 7.02E-14              |
| 1426175_a_at | tryptase alpha/beta 1                       | Tpsab1      | 100.39                                      | 2.91E-09              |
| 1460230_at   | synapsin II                                 | Syn2        | -91.27                                      | 4.98E-12              |
| 1428460_at   | synapsin II                                 | Syn2        | -91.16                                      | 1.75E-11              |
| 1449175_at   | G-protein coupled receptor 65               | Gpr65       | -90.02                                      | 3.07E-08              |
| 1438858_x_at | histocompatibility 2, class II antigen A, a | H2-Aa       | 84.89                                       | 4.49E-13              |
| 1416505_at   | nuclear receptor subfamily 4, group A, m    | Nr4a1       | -84.28                                      | 2.66E-06              |
| 1422352_at   | mast cell protease 1                        | Mcpt1       | 83.38                                       | 3.62E-13              |
| 1453055_at   | sema domain, transmembrane domain (T        | Sema6d      | 80.50                                       | 9.50E-10              |
| 1442582_at   | germinal center expressed transcript 2      | Gcet2       | -79.63                                      | 4.29E-14              |
| 1436823_x_at | hemoglobin Y, beta-like embryonic chain     | Hbb-y       | -77.16                                      | 9.17E-10              |
| 1417534_at   | integrin beta 5                             | Itgb5       | 74.49                                       | 1.34E-06              |
| 1460292_a_at | SWI/SNF related, matrix associated, acti    | Smarca1     | -74.30                                      | 3.39E-10              |
| 1419717_at   | sema domain, immunoglobulin domain (I       | Sema3e      | 74.26                                       | 2.26E-10              |
| 1449455_at   | hemopoietic cell kinase                     | Hck         | -73.74                                      | 2.61E-09              |
| 1417533_a_at | integrin beta 5                             | Itgb5       | 60.40                                       | 6.04E-07              |
| 1422134_at   | FBJ osteosarcoma oncogene B                 | Fosb        | -60.33                                      | 2.01E-05              |
| 1436717_x_at | hemoglobin Y, beta-like embryonic chain     | Hbb-y       | -60.26                                      | 4.43E-11              |
| 1443783_x_at | histocompatibility 2, class II antigen A, a | H2-Aa       | 59.08                                       | 1.15E-05              |
| 1447979_at   | small G protein signaling modulator 1       | Sgsm1       | -57.16                                      | 2.11E-04              |
| 1426001_at   | eomesodermin homolog (Xenopus laevis)       | Eomes       | -51.70                                      | 1.26E-12              |
| 1449465_at   | reelin                                      | Reln        | 51.18                                       | 4.45E-12              |
| 1439874_at   | RIKEN cDNA 9330102E08 gene                  | 9330102E08  | -50.04                                      | 1.09E-05              |
| 1460469_at   | tumor necrosis factor receptor superfamil   | Tnfrsf9     | 47.34                                       | 2.08E-09              |
| 1448123_s_at | transforming growth factor, beta induced    | Tgfbi       | -43.92                                      | 6.15E-07              |
| 1436598_at   | inducible T-cell co-stimulator              | Icos        | 42.57                                       | 6.13E-14              |
| 1427683_at   | early growth response 2                     | Egr2        | -42.14                                      | 2.83E-07              |
| 1446452_at   | ---                                         | ---         | 41.88                                       | 2.25E-10              |
| 1427442_a_at | amyloid beta (A4) precursor protein         | App         | 40.97                                       | 2.52E-12              |
| 1417640_at   | CD79B antigen                               | Cd79b       | 37.63                                       | 1.54E-13              |

|              |                                                                  |            |        |          |
|--------------|------------------------------------------------------------------|------------|--------|----------|
| 1425229_a_at | transcription factor 7-like 2, T-cell specific                   | Tcf7l2     | 37.43  | 3.47E-10 |
| 1421137_a_at | protein kinase inhibitor beta, cAMP dependent                    | Pkib       | 37.17  | 2.07E-11 |
| 1443885_at   | ---                                                              | ---        | 37.08  | 1.60E-15 |
| 1417012_at   | syndecan 2                                                       | Sdc2       | 36.09  | 3.37E-06 |
| 1421256_at   | granzyme C                                                       | Gzmc       | 35.62  | 3.59E-09 |
| 1419289_a_at | synaptogyrin 1                                                   | Syngn1     | -35.24 | 5.81E-11 |
| 1427452_at   | predicted gene 5045 /// predicted gene 62                        | Gm5045 /// | 33.96  | 1.19E-14 |
| 1447980_s_at | small G protein signaling modulator 1                            | Sgsm1      | -32.50 | 1.50E-05 |
| 1421173_at   | interferon regulatory factor 4                                   | Irf4       | 30.76  | 1.89E-16 |
| 1450621_a_at | hemoglobin Y, beta-like embryonic chain                          | Hbb-y      | -30.61 | 2.22E-09 |
| 1451355_at   | alkaline ceramidase 2                                            | Acer2      | -30.21 | 9.21E-08 |
| 1418804_at   | succinate receptor 1                                             | Sucnr1     | -30.04 | 1.20E-08 |
| 1416441_at   | plasma glutamate carboxypeptidase                                | Pgcp       | 30.02  | 7.66E-07 |
| 1434661_at   | synaptogyrin 1                                                   | Syngn1     | -29.87 | 2.68E-11 |
| 1460480_at   | endogenous retroviral sequence 3                                 | Erv3       | -29.84 | 7.38E-10 |
| 1421473_at   | interleukin 1 alpha                                              | Il1a       | 29.64  | 7.19E-16 |
| 1427682_a_at | early growth response 2                                          | Egr2       | -29.43 | 1.97E-07 |
| 1456133_x_at | integrin beta 5                                                  | Itgb5      | 28.90  | 2.36E-10 |
| 1449030_at   | synapsin II                                                      | Syn2       | -28.85 | 7.86E-10 |
| 1453547_at   | RIKEN cDNA 1810046K07 gene                                       | 1810046K07 | 28.68  | 3.68E-11 |
| 1459646_at   | heparan sulfate (glucosamine) 3-O-sulfotransferase 6             | Hs3st6     | 28.32  | 1.04E-10 |
| 1439774_at   | paired related homeobox 1                                        | Prrx1      | -28.16 | 4.52E-06 |
| 1418221_at   | casein alpha s2-like B                                           | Csn1s2b    | 27.44  | 1.11E-12 |
| 1436170_a_at | casein alpha s2-like A                                           | Csn1s2a    | 27.30  | 2.24E-11 |
| 1449431_at   | transient receptor potential cation channel subfamily 6 member 6 | Trpc6      | -27.23 | 1.35E-13 |
| 1421228_at   | chemokine (C-C motif) ligand 7                                   | Ccl7       | -26.85 | 1.63E-09 |
| 1435511_at   | synapsin II                                                      | Syn2       | -25.97 | 6.66E-08 |
| 1437385_at   | collagen and calcium binding EGF domain                          | Ccbe1      | 25.88  | 9.50E-09 |
| 1450784_at   | reversion-inducing-cysteine-rich protein with tyrosine kinase    | Reck       | 25.84  | 6.58E-15 |
| 1427673_a_at | sema domain, immunoglobulin domain (class 5)                     | Sema3e     | 25.81  | 1.08E-10 |
| 1460241_a_at | ST3 beta-galactoside alpha-2,3-sialyltransferase 5               | St3gal5    | -25.57 | 8.54E-09 |
| 1448929_at   | coagulation factor XIII, A1 subunit                              | F13a1      | -24.56 | 1.69E-10 |
| 1425967_a_at | mast cell protease 4                                             | Mcpt4      | 24.25  | 1.34E-09 |
| 1449838_at   | cysteine-rich secretory protein 3                                | Crisp3     | 23.92  | 1.88E-10 |
| 1425503_at   | glucosaminyl (N-acetyl) transferase 2, I-h                       | Gcnt2      | 23.40  | 4.29E-10 |
| 1449198_a_at | ST3 beta-galactoside alpha-2,3-sialyltransferase 5               | St3gal5    | -22.34 | 7.26E-11 |
| 1456250_x_at | transforming growth factor, beta induced                         | Tgfb1      | -22.04 | 7.28E-07 |
| 1454984_at   | leukemia inhibitory factor receptor                              | Lifr       | -20.91 | 1.05E-07 |
| 1429427_s_at | transcription factor 7-like 2, T-cell specific                   | Tcf7l2     | 20.73  | 1.07E-10 |
| 1443686_at   | histocompatibility 2, class II, locus Mb2                        | H2-DMb2    | 20.46  | 1.23E-11 |
| 1438796_at   | nuclear receptor subfamily 4, group A, member 3                  | Nr4a3      | -20.27 | 7.03E-11 |
| 1425477_x_at | histocompatibility 2, class II antigen A, beta                   | H2-Ab1     | 19.87  | 4.69E-11 |
| 1450648_s_at | histocompatibility 2, class II antigen A, beta                   | H2-Ab1     | 19.66  | 3.29E-11 |
| 1429273_at   | BMP-binding endothelial regulator                                | Bmper      | 19.18  | 4.05E-11 |
| 1418788_at   | endothelial-specific receptor tyrosine kinase                    | Tek        | -19.01 | 1.83E-11 |
| 1425749_at   | syntaxin binding protein 6 (amisyn)                              | Stxbp6     | 18.75  | 1.13E-13 |
| 1451721_a_at | histocompatibility 2, class II antigen A, beta                   | H2-Ab1     | 18.67  | 5.40E-10 |

|              |                                              |          |        |          |
|--------------|----------------------------------------------|----------|--------|----------|
| 1432133_at   | Ryanodine receptor 3                         | Ryr3     | -18.66 | 9.67E-12 |
| 1425452_s_at | family with sequence similarity 84, mem      | Fam84a   | -18.65 | 1.81E-07 |
| 1421471_at   | neuropeptide Y receptor Y1                   | Npy1r    | -18.53 | 4.63E-04 |
| 1456195_x_at | integrin beta 5                              | Itgb5    | 18.22  | 5.75E-06 |
| 1436329_at   | early growth response 3                      | Egr3     | -18.18 | 2.84E-09 |
| 1420688_a_at | sarcoglycan, epsilon                         | Sgce     | 18.10  | 5.57E-13 |
| 1418934_at   | mab-21-like 2 (C. elegans)                   | Mab21l2  | -18.03 | 4.39E-07 |
| 1437417_s_at | glypican 6                                   | Gpc6     | 17.74  | 7.36E-09 |
| 1443518_at   | sarcoglycan, epsilon                         | Sgce     | 17.72  | 6.08E-11 |
| 1418782_at   | retinoid X receptor gamma                    | Rxrg     | -17.65 | 4.09E-06 |
| 1429206_at   | Rho-related BTB domain containing 1          | Rhobtb1  | -17.61 | 6.20E-08 |
| 1419015_at   | WNT1 inducible signaling pathway prote       | Wisp2    | -17.59 | 4.91E-10 |
| 1421168_at   | ATP-binding cassette, sub-family G (WH       | Abcg3    | -17.28 | 4.69E-11 |
| 1451204_at   | scavenger receptor class A, member 5 (p      | Scara5   | -17.27 | 3.72E-10 |
| 1428914_at   | SH3 and PX domains 2A                        | Sh3pxd2a | 17.18  | 9.56E-13 |
| 1418106_at   | hairy/enhancer-of-split related with YRP     | Hey2     | -17.08 | 7.58E-10 |
| 1427038_at   | preproenkephalin                             | Penk     | 17.00  | 7.81E-06 |
| 1427427_at   | ryanodine receptor 3                         | Ryr3     | -16.85 | 2.33E-13 |
| 1426639_a_at | transcription factor 7-like 2, T-cell specif | Tcf7l2   | 16.72  | 6.31E-13 |
| 1428774_at   | glypican 6                                   | Gpc6     | 16.60  | 3.57E-09 |
| 1427119_at   | serine peptidase inhibitor, Kazal type 4     | Spink4   | -16.51 | 3.58E-12 |
| 1443687_x_at | histocompatibility 2, class II, locus Mb2    | H2-DMb2  | 16.25  | 2.26E-11 |
| 1437187_at   | E2F transcription factor 7                   | E2f7     | -16.23 | 6.32E-05 |
| 1418776_at   | guanylate-binding protein 8                  | Gbp8     | -16.17 | 4.72E-11 |
| 1427256_at   | versican                                     | Vcan     | -16.14 | 1.72E-09 |
| 1428304_at   | establishment of cohesion 1 homolog 2 (S     | Esco2    | -16.11 | 3.95E-10 |
| 1460218_at   | CD52 antigen                                 | Cd52     | 15.94  | 6.23E-09 |
| 1439915_at   | ---                                          | ---      | 15.92  | 2.04E-08 |
| 1421694_a_at | versican                                     | Vcan     | -15.91 | 3.25E-10 |
| 1448985_at   | dual specificity phosphatase 22              | Dusp22   | 15.85  | 3.53E-13 |
| 1434728_at   | glutamate receptor, ionotropic, AMPA3 (      | Gria3    | -15.83 | 2.90E-09 |
| 1450234_at   | membrane-spanning 4-domains, subfamil        | Ms4a6c   | 15.81  | 1.79E-07 |
| 1416236_a_at | myelin protein zero-like 2                   | Mpzl2    | -15.74 | 4.61E-04 |
| 1417932_at   | interleukin 18                               | Il18     | 15.66  | 5.21E-12 |
| 1435396_at   | syntaxin binding protein 6 (amisyn)          | Stxbp6   | 15.65  | 2.93E-10 |
| 1448499_a_at | epoxide hydrolase 2, cytoplasmic             | Ephx2    | 15.65  | 1.40E-10 |
| 1451935_a_at | serine protease inhibitor, Kunitz type 2     | Spint2   | 15.61  | 8.59E-11 |
| 1422912_at   | bone morphogenetic protein 4                 | Bmp4     | 15.50  | 8.26E-16 |
| 1425526_a_at | paired related homeobox 1                    | Prrx1    | -15.48 | 8.10E-07 |
| 1415971_at   | myristoylated alanine rich protein kinase    | Marcks   | 15.47  | 8.90E-12 |
| 1429428_at   | transcription factor 7-like 2, T-cell specif | Tcf7l2   | 15.43  | 1.05E-07 |
| 1415871_at   | transforming growth factor, beta induced     | Tgfbi    | -15.20 | 1.00E-04 |
| 1419082_at   | serine (or cysteine) peptidase inhibitor, c  | Serpinb2 | -14.87 | 3.96E-10 |
| 1428393_at   | neuritin 1                                   | Nrn1     | -14.84 | 3.37E-12 |
| 1451634_at   | antisense Igf2r RNA                          | Airn     | -14.61 | 2.11E-07 |
| 1446119_at   | ---                                          | ---      | -14.55 | 1.25E-09 |
| 1419816_s_at | ERBB receptor feedback inhibitor 1           | Errfi1   | -14.51 | 3.01E-07 |

|              |                                             |              |        |          |
|--------------|---------------------------------------------|--------------|--------|----------|
| 1442542_at   | eyes absent 4 homolog (Drosophila)          | Eya4         | -14.48 | 3.37E-09 |
| 1438968_x_at | serine protease inhibitor, Kunitz type 2    | Spint2       | 14.38  | 6.46E-11 |
| 1443926_at   | ---                                         | ---          | 14.38  | 3.34E-11 |
| 1444543_at   | ---                                         | ---          | 14.28  | 1.84E-11 |
| 1450141_at   | ATP-binding cassette, sub-family G (WH      | Abcg3        | -14.08 | 2.28E-10 |
| 1439568_at   | gene regulated by estrogen in breast canc   | Greb1 /// LC | -13.65 | 8.49E-06 |
| 1455165_at   | RAR-related orphan receptor alpha           | Rora         | -13.54 | 9.61E-12 |
| 1439327_at   | collagen and calcium binding EGF doma       | Ccbe1        | 13.47  | 3.95E-05 |
| 1419152_at   | RIKEN cDNA 2810417H13 gene                  | 2810417H1    | -13.35 | 7.50E-09 |
| 1418030_at   | solute carrier organic anion transporter fa | Slco3a1      | 13.31  | 5.92E-08 |
| 1428938_at   | guanine nucleotide binding protein, alpha   | Gnaq         | 13.31  | 1.94E-12 |
| 1438448_at   | otopetrin 1                                 | Otop1        | -13.08 | 4.66E-08 |
| 1458129_at   | RAR-related orphan receptor alpha           | Rora         | -13.02 | 8.83E-11 |
| 1449041_a_at | thyroid hormone receptor interactor 6       | Trip6        | 13.00  | 1.27E-04 |
| 1453590_at   | ADP-ribosylation factor-like 5B             | Arl5b        | -12.90 | 1.40E-07 |
| 1418713_at   | pterin 4 alpha carbinolamine dehydratase    | Pcbd1        | 12.75  | 6.00E-13 |
| 1420633_a_at | casein alpha s2-like A                      | Csn1s2a      | 12.72  | 2.97E-11 |
| 1434314_s_at | RAB11 family interacting protein 5 (clas    | Rab11fip5    | 12.53  | 5.66E-11 |
| 1426004_a_at | transglutaminase 2, C polypeptide           | Tgm2         | -12.46 | 1.26E-10 |
| 1420583_a_at | RAR-related orphan receptor alpha           | Rora         | -12.33 | 4.73E-10 |
| 1421194_at   | integrin alpha 4                            | Itga4        | 12.17  | 8.29E-11 |
| 1450790_at   | thyroglobulin                               | Tg           | -12.10 | 4.32E-09 |
| 1421595_at   | family with sequence similarity 184, mem    | Fam184b      | 12.07  | 9.04E-07 |
| 1439150_x_at | GH regulated TBC protein 1                  | Grtp1        | -12.04 | 2.23E-11 |
| 1437250_at   | melanoregulin                               | Mreg         | 11.98  | 2.12E-06 |
| 1435981_at   | neuron navigator 2                          | Nav2         | -11.96 | 1.60E-07 |
| 1416635_at   | sphingomyelin phosphodiesterase, acid-li    | Smpd13a      | 11.95  | 2.89E-10 |
| 1435622_at   | heparan sulfate (glucosamine) 3-O-sulfot    | Hs3st3a1     | 11.90  | 2.10E-12 |
| 1419135_at   | lymphotoxin B                               | Ltb          | 11.75  | 1.08E-11 |
| 1421965_s_at | Notch gene homolog 3 (Drosophila)           | Notch3       | -11.70 | 7.01E-07 |
| 1443561_at   | ---                                         | ---          | 11.64  | 9.37E-10 |
| 1420859_at   | protein kinase inhibitor, alpha             | Pkia         | 11.58  | 9.37E-09 |
| 1419688_at   | glypican 6                                  | Gpc6         | 11.54  | 6.69E-11 |
| 1438782_at   | contactin 4                                 | Cntn4        | -11.45 | 1.05E-07 |
| 1434169_at   | RIKEN cDNA 9030409G11 gene                  | 9030409G1    | -11.37 | 3.69E-06 |
| 1453201_at   | Ras association (RalGDS/AF-6) domain        | Rassf10      | 11.16  | 2.22E-05 |
| 1432129_a_at | paired related homeobox 1                   | Prrx1        | -11.05 | 1.40E-06 |
| 1449222_at   | Epstein-Barr virus induced gene 3           | Ebi3         | 11.05  | 1.10E-06 |
| 1460602_at   | deleted in liver cancer 1                   | Dlc1         | -10.99 | 1.21E-08 |
| 1429559_at   | guanine nucleotide binding protein, alpha   | Gnaq         | 10.92  | 3.85E-11 |
| 1438934_x_at | sema domain, immunoglobulin domain (I       | Sema4a       | -10.90 | 2.43E-08 |
| 1426258_at   | sortilin-related receptor, LDLR class A r   | Sorl1        | 10.89  | 1.06E-12 |
| 1434437_x_at | ribonucleotide reductase M2                 | Rrm2         | -10.88 | 2.99E-07 |
| 1427713_x_at | POU domain, class 2, transcription factor   | Pou2f2       | 10.86  | 8.61E-04 |
| 1438263_at   | RIKEN cDNA 9430020K01 gene                  | 9430020K0    | -10.85 | 5.53E-05 |
| 1417500_a_at | transglutaminase 2, C polypeptide           | Tgm2         | -10.84 | 1.14E-09 |
| 1427257_at   | versican                                    | Vcan         | -10.82 | 5.13E-11 |

|              |                                                            |                       |        |          |
|--------------|------------------------------------------------------------|-----------------------|--------|----------|
| 1427405_s_at | RAB11 family interacting protein 5 (class B)               | Rab11fip5             | 10.71  | 2.22E-08 |
| 1424704_at   | runt related transcription factor 2                        | Runx2                 | 10.68  | 2.09E-09 |
| 1453003_at   | sortilin-related receptor, LDLR class A receptor           | Sorl1                 | 10.58  | 9.85E-10 |
| 1448627_s_at | PDZ binding kinase                                         | Pbk                   | -10.57 | 5.64E-08 |
| 1457108_at   | ---                                                        | ---                   | -10.56 | 4.31E-06 |
| 1427365_at   | keratin 86                                                 | Krt86                 | -10.55 | 1.04E-08 |
| 1455213_at   | Tmsb15b1-Tmsb15b2 readthrough transcript                   | Tmsb15b1-7            | 10.51  | 3.43E-12 |
| 1448110_at   | sema domain, immunoglobulin domain (Type I)                | Sema4a                | -10.41 | 5.28E-08 |
| 1438494_at   | histamine receptor H1 /// similar to histamine receptor H1 | Hrh1 /// LOC100506101 | 10.38  | 6.59E-09 |
| 1421964_at   | Notch gene homolog 3 (Drosophila)                          | Notch3                | -10.31 | 8.93E-06 |
| 1425815_a_at | hyaluronan mediated motility receptor (R)                  | Hmmr                  | -10.28 | 8.33E-09 |
| 1441254_at   | par-3 partitioning defective 3 homolog B                   | Pard3b                | 10.22  | 1.12E-05 |
| 1455729_at   | guanine nucleotide binding protein, alpha 11               | Gnaq                  | 10.14  | 5.74E-10 |
| 1424111_at   | insulin-like growth factor 2 receptor                      | Igf2r                 | -10.14 | 1.07E-07 |
| 1436173_at   | deleted in liver cancer 1                                  | Dlc1                  | -10.07 | 2.71E-09 |
| 1446536_at   | sema domain, transmembrane domain (Type I)                 | Sema6d                | 10.05  | 9.79E-10 |
| 1417960_at   | cytoplasmic polyadenylation element binding protein 1      | Cpeb1                 | 10.01  | 1.32E-09 |
| 1421415_s_at | glucosaminyl (N-acetyl) transferase 2, I-h                 | Gent2                 | 9.91   | 5.96E-07 |
| 1416871_at   | a disintegrin and metallopeptidase domain                  | Adam8                 | 9.90   | 8.81E-09 |
| 1439750_at   | ---                                                        | ---                   | -9.85  | 2.45E-09 |
| 1449049_at   | toll-like receptor 1                                       | Tlr1                  | 9.84   | 5.47E-12 |
| 1432466_a_at | apolipoprotein E                                           | ApoE                  | -9.82  | 1.69E-11 |
| 1450758_at   | contactin associated protein-like 2                        | Cntnap2               | -9.81  | 2.83E-09 |
| 1451430_at   | slit homolog 2 (Drosophila)                                | Slit2                 | 9.79   | 8.22E-06 |
| 1425248_a_at | similar to Rse /// TYRO3 protein tyrosine kinase           | LOC100048101          | 9.78   | 1.13E-05 |
| 1417757_at   | unc-13 homolog B (C. elegans)                              | Unc13b                | -9.75  | 2.26E-09 |
| 1430811_a_at | NUF2, NDC80 kinetochore complex component                  | Nuf2                  | -9.71  | 4.95E-09 |
| 1424769_s_at | caldesmon 1                                                | Cald1                 | 9.63   | 2.01E-09 |
| 1449903_at   | cytotoxic and regulatory T cell molecule 1                 | Crtam                 | -9.58  | 2.10E-08 |
| 1451453_at   | death-associated protein kinase 2                          | Dapk2                 | 9.55   | 3.51E-09 |
| 1424278_a_at | baculoviral IAP repeat-containing 5                        | Birc5                 | -9.49  | 1.04E-07 |
| 1428361_x_at | hemoglobin alpha, adult chain 1 /// hemoglobin             | Hba-a1 /// HBA1       | -9.48  | 1.55E-04 |
| 1452533_at   | ryanodine receptor 3                                       | Ryr3                  | -9.48  | 3.40E-09 |
| 1458159_at   | ---                                                        | ---                   | 9.46   | 2.08E-08 |
| 1428535_at   | RIKEN cDNA 9430020K01 gene                                 | 9430020K01            | -9.44  | 8.82E-07 |
| 1446176_at   | ---                                                        | ---                   | 9.40   | 4.99E-10 |
| 1421511_at   | integrin beta 3                                            | Itgb3                 | -9.37  | 4.06E-07 |
| 1438466_at   | dynein, axonemal, heavy chain 7B                           | Dnahc7b               | 9.34   | 1.83E-10 |
| 1437884_at   | ADP-ribosylation factor-like 5B                            | Arl5b                 | -9.27  | 2.23E-07 |
| 1456311_x_at | establishment of cohesion 1 homolog 2 (Drosophila)         | Esco2                 | -9.24  | 3.85E-09 |
| 1425603_at   | transmembrane protein 176A                                 | Tmem176a              | -9.18  | 5.39E-08 |
| 1437463_x_at | transforming growth factor, beta induced                   | Tgfb1                 | -9.15  | 2.73E-08 |
| 1452954_at   | ubiquitin-conjugating enzyme E2C                           | Ube2c                 | -9.14  | 2.75E-07 |
| 1448591_at   | cathepsin S                                                | Ctss                  | 9.14   | 8.24E-09 |
| 1427231_at   | roundabout homolog 1 (Drosophila)                          | Robo1                 | 9.10   | 7.58E-06 |
| 1416129_at   | ERBB receptor feedback inhibitor 1                         | Errfi1                | -8.99  | 6.53E-10 |
| 1448775_at   | interferon activated gene 203                              | Ifi203                | 8.98   | 6.59E-07 |

|              |                                                                  |              |       |          |
|--------------|------------------------------------------------------------------|--------------|-------|----------|
| 1444566_at   | Uncoupling protein 2 (mitochondrial, pro                         | Ucp2         | -8.96 | 5.86E-07 |
| 1428940_at   | guanine nucleotide binding protein, alpha                        | Gnaq         | 8.95  | 4.87E-08 |
| 1440091_at   | Meis homeobox 2                                                  | Meis2        | 8.94  | 1.84E-11 |
| 1423626_at   | dystonin                                                         | Dst          | 8.94  | 1.03E-09 |
| 1455257_at   | integrin beta 3                                                  | Itgb3        | -8.88 | 2.29E-08 |
| 1422474_at   | phosphodiesterase 4B, cAMP specific                              | Pde4b        | 8.83  | 4.11E-05 |
| 1439794_at   | netrin 4                                                         | Ntn4         | -8.83 | 4.00E-12 |
| 1455166_at   | ADP-ribosylation factor-like 5B                                  | Arl5b        | -8.79 | 8.73E-08 |
| 1452519_a_at | zinc finger protein 36                                           | Zfp36        | -8.76 | 7.63E-05 |
| 1428834_at   | dual specificity phosphatase 4                                   | Dusp4        | -8.65 | 7.56E-08 |
| 1440852_at   | isopentenyl-diphosphate delta isomerase                          | Idi2         | -8.62 | 2.46E-05 |
| 1437898_at   | RIKEN cDNA C920009B18 gene                                       | C920009B1    | 8.61  | 5.08E-11 |
| 1435148_at   | ATPase, Na <sup>+</sup> /K <sup>+</sup> transporting, beta 2 pol | Atp1b2       | -8.58 | 1.36E-10 |
| 1415904_at   | lipoprotein lipase                                               | Lpl          | -8.54 | 1.31E-10 |
| 1434096_at   | solute carrier family 4 (anion exchanger)                        | Slc4a4       | -8.52 | 2.53E-09 |
| 1424034_at   | RAR-related orphan receptor alpha                                | Rora         | -8.49 | 3.08E-11 |
| 1456945_at   | nudix (nucleoside diphosphate linked mo                          | Nudt6        | -8.43 | 1.97E-10 |
| 1427161_at   | centromere protein F                                             | Cenpf        | -8.43 | 8.21E-08 |
| 1450611_at   | orosomucoid 3                                                    | Orm3         | -8.41 | 1.40E-04 |
| 1417262_at   | prostaglandin-endoperoxide synthase 2                            | Ptgs2        | -8.41 | 1.86E-04 |
| 1460125_at   | coiled-coil domain containing 141                                | Ccdc141      | -8.33 | 4.07E-06 |
| 1428939_s_at | guanine nucleotide binding protein, alpha                        | Gnaq         | 8.25  | 1.55E-07 |
| 1436326_at   | RAR-related orphan receptor alpha                                | Rora         | -8.23 | 1.04E-07 |
| 1449989_at   | mast cell protease 2                                             | Mcpt2        | 8.21  | 1.86E-10 |
| 1427495_at   | sodium channel, voltage-gated, type VII,                         | Scn7a        | 8.18  | 1.50E-04 |
| 1417307_at   | dystrophin, muscular dystrophy                                   | Dmd          | -8.18 | 4.43E-08 |
| 1436325_at   | RAR-related orphan receptor alpha                                | Rora         | -8.16 | 2.02E-08 |
| 1457358_at   | ---                                                              | ---          | 8.12  | 6.17E-07 |
| 1435330_at   | pyrin and HIN domain family, member 1                            | Pyhin1       | 8.10  | 6.75E-11 |
| 1447046_at   | Uncoupling protein 2 (mitochondrial, pro                         | Ucp2         | -8.09 | 3.25E-06 |
| 1452757_s_at | hemoglobin alpha, adult chain 1 /// hemo                         | Hba-a1 /// H | -8.08 | 6.27E-10 |
| 1450119_at   | dystonin                                                         | Dst          | 8.08  | 2.61E-06 |
| 1437433_at   | UDP-Gal:betaGlcNAc beta 1,3-galactosyl                           | B3galt2      | 8.05  | 1.01E-06 |
| 1424046_at   | budding uninhibited by benzimidazoles 1                          | Bub1         | -8.01 | 5.00E-08 |
| 1433428_x_at | transglutaminase 2, C polypeptide                                | Tgm2         | -8.01 | 2.26E-10 |
| 1441756_at   | ---                                                              | ---          | 7.99  | 1.36E-09 |
| 1457376_at   | ---                                                              | ---          | 7.99  | 6.64E-10 |
| 1444269_at   | ---                                                              | ---          | 7.98  | 1.48E-10 |
| 1447886_at   | RIKEN cDNA 0610040B09 gene                                       | 0610040B09   | 7.95  | 3.75E-07 |
| 1434496_at   | polo-like kinase 3 (Drosophila)                                  | Plk3         | -7.93 | 4.98E-06 |
| 1450920_at   | cyclin B2                                                        | Ccnb2        | -7.90 | 1.03E-08 |
| 1430574_at   | cyclin-dependent kinase inhibitor 3                              | Cdkn3        | -7.86 | 2.40E-08 |
| 1438752_at   | RIKEN cDNA A230058F20 gene                                       | A230058F20   | -7.85 | 4.82E-07 |
| 1448113_at   | stathmin 1                                                       | Stmn1        | -7.85 | 3.07E-10 |
| 1418257_at   | solute carrier family 12, member 7                               | Slc12a7      | 7.85  | 6.89E-10 |
| 1426260_a_at | UDP glucuronosyltransferase 1 family, p                          | Ugt1a1 /// U | 7.81  | 2.69E-06 |
| 1448890_at   | Kruppel-like factor 2 (lung)                                     | Klf2         | -7.78 | 3.34E-08 |

|              |                                            |            |       |          |
|--------------|--------------------------------------------|------------|-------|----------|
| 1450496_a_at | spindle and kinetochore associated comp    | Ska1       | -7.78 | 1.67E-03 |
| 1451069_at   | proviral integration site 3                | Pim3       | -7.77 | 2.24E-08 |
| 1459301_at   | ---                                        | ---        | 7.72  | 3.05E-09 |
| 1422798_at   | contactin associated protein-like 2        | Cntnap2    | -7.72 | 2.83E-10 |
| 1450155_at   | integrin alpha 4                           | Itga4      | 7.68  | 2.91E-08 |
| 1430762_at   | RIKEN cDNA 4833427G06 gene                 | 4833427G06 | 7.67  | 1.04E-09 |
| 1418736_at   | UDP-GalNAc:betaGlcNAc beta 1,3-gala        | B3galnt1   | 7.67  | 4.25E-07 |
| 1452907_at   | galactosylceramidase                       | Galc       | -7.66 | 7.34E-08 |
| 1417756_a_at | lymphocyte specific 1                      | Lsp1       | 7.66  | 1.37E-03 |
| 1442395_at   | ---                                        | ---        | 7.65  | 5.00E-12 |
| 1437270_a_at | cardiotrophin-like cytokine factor 1       | Clcf1      | 7.63  | 6.75E-05 |
| 1422166_at   | C-type lectin domain family 2, member i    | Clec2i     | 7.63  | 3.76E-12 |
| 1425906_a_at | sema domain, immunoglobulin domain (l      | Sema3e     | 7.61  | 3.91E-07 |
| 1456665_at   | eyes absent 4 homolog (Drosophila)         | Eya4       | -7.58 | 4.85E-06 |
| 1457632_s_at | Meis homeobox 2                            | Meis2      | 7.57  | 3.04E-10 |
| 1417635_at   | sperm autoantigenic protein 17             | Spa17      | -7.55 | 6.27E-07 |
| 1456901_at   | a disintegrin-like and metallopeptidase (r | Adamts20   | 7.54  | 2.77E-07 |
| 1421571_a_at | similar to Lymphocyte antigen 6C precur    | LOC100045  | -7.52 | 2.07E-10 |
| 1422245_a_at | MRV integration site 1                     | Mrvi1      | -7.47 | 7.52E-05 |
| 1445638_at   | ---                                        | ---        | 7.44  | 1.83E-07 |
| 1449851_at   | period homolog 1 (Drosophila)              | Per1       | -7.43 | 5.86E-08 |
| 1434350_at   | cysteine-serine-rich nuclear protein 1     | Csrnp1     | -7.39 | 1.12E-07 |
| 1448665_at   | dystrophin, muscular dystrophy             | Dmd        | -7.38 | 2.63E-10 |
| 1440188_at   | ---                                        | ---        | 7.37  | 6.07E-09 |
| 1429481_at   | non-catalytic region of tyrosine kinase ad | Nck2       | -7.36 | 8.92E-12 |
| 1443201_at   | ---                                        | ---        | 7.36  | 4.66E-10 |
| 1417877_at   | endonuclease/exonuclease/phosphatase f     | Eepd1      | -7.35 | 1.14E-06 |
| 1438210_at   | G protein-coupled receptor 149             | Gpr149     | -7.34 | 4.10E-06 |
| 1420563_at   | glutamate receptor, ionotropic, AMPA3 (    | Gria3      | -7.34 | 1.65E-07 |
| 1433959_at   | zinc finger, matrin type 4                 | Zmat4      | -7.29 | 8.48E-04 |
| 1417910_at   | cyclin A2                                  | Ccna2      | -7.28 | 1.72E-08 |
| 1417011_at   | syndecan 2                                 | Sdc2       | 7.22  | 4.69E-05 |
| 1424060_at   | nei like 3 (E. coli)                       | Nei3       | -7.20 | 6.70E-08 |
| 1456700_x_at | myristoylated alanine rich protein kinase  | Marcks     | 7.17  | 3.92E-09 |
| 1422009_at   | ATPase, Na+/K+ transporting, beta 2 pol    | Atp1b2     | -7.16 | 2.12E-04 |
| 1420621_a_at | amyloid beta (A4) precursor protein        | App        | 7.16  | 1.63E-10 |
| 1452257_at   | 3-hydroxybutyrate dehydrogenase, type I    | Bdh1       | 7.14  | 7.62E-04 |
| 1426906_at   | myeloid nuclear differentiation antigen li | Mndal      | 7.13  | 1.28E-05 |
| 1426869_at   | biregional cell adhesion molecule-related  | Boc        | -7.12 | 7.39E-08 |
| 1454903_at   | nerve growth factor receptor (TNFR supe    | Ngfr       | -7.12 | 1.49E-09 |
| 1434980_at   | phosphoinositide-3-kinase, regulatory sul  | Pik3r5     | 7.12  | 4.43E-05 |
| 1432959_at   | RIKEN cDNA 4930447I22 gene                 | 4930447I22 | -7.11 | 1.12E-05 |
| 1440762_at   | synapsin II                                | Syn2       | -7.11 | 1.69E-06 |
| 1429350_at   | EP300 interacting inhibitor of differentia | Eid3       | -7.09 | 1.66E-05 |
| 1448575_at   | interleukin 7 receptor                     | Il7r       | -7.07 | 2.24E-05 |
| 1424754_at   | membrane-spanning 4-domains, subfamil      | Ms4a7      | 7.05  | 1.30E-09 |
| 1437232_at   | bactericidal/permeability-increasing prot  | Bpil2      | -7.03 | 7.40E-09 |

|              |                                             |                |       |          |
|--------------|---------------------------------------------|----------------|-------|----------|
| 1436043_at   | sodium channel, voltage-gated, type VII,    | Scn7a          | 7.00  | 2.46E-07 |
| 1452348_s_at | interferon activated gene 203 /// interfero | Ifi203 /// Ifi | 6.99  | 2.38E-08 |
| 1418555_x_at | Spi-C transcription factor (Spi-1/PU.1 rel  | Spic           | 6.96  | 8.68E-11 |
| 1440456_at   | dynein, axonemal, heavy chain 7A            | Dnahc7a        | 6.96  | 2.47E-09 |
| 1442608_at   | layilin                                     | Layn           | 6.95  | 2.07E-10 |
| 1452231_x_at | myeloid nuclear differentiation antigen li  | Mndal          | 6.95  | 1.08E-05 |
| 1440363_at   | ---                                         | ---            | -6.94 | 7.33E-06 |
| 1435461_at   | membrane associated guanylate kinase, V     | Magi3          | 6.93  | 3.85E-09 |
| 1416022_at   | fatty acid binding protein 5, epidermal     | Fabp5          | -6.93 | 1.69E-06 |
| 1435339_at   | potassium channel tetramerisation domai     | Kctd15         | 6.92  | 3.21E-11 |
| 1451407_at   | immunoglobulin superfamily, member 5        | Igsf5 /// Pcp  | 6.91  | 1.23E-03 |
| 1456426_at   | ---                                         | ---            | 6.84  | 1.32E-09 |
| 1447861_x_at | Meis homeobox 2                             | Meis2          | 6.84  | 4.97E-11 |
| 1448226_at   | ribonucleotide reductase M2                 | Rrm2           | -6.81 | 9.15E-08 |
| 1437611_x_at | kinesin family member 2C                    | Kif2c          | -6.80 | 5.95E-09 |
| 1436044_at   | sodium channel, voltage-gated, type VII,    | Scn7a          | 6.80  | 8.12E-12 |
| 1417588_at   | UDP-N-acetyl-alpha-D-galactosamine:pc       | Galnt3         | -6.78 | 2.14E-10 |
| 1421930_at   | inducible T-cell co-stimulator              | Icos           | 6.76  | 2.01E-11 |
| 1426873_s_at | junction plakoglobin                        | Jup            | 6.76  | 2.77E-11 |
| 1443552_at   | RIKEN cDNA E230008N13 gene                  | E230008N1      | -6.76 | 5.76E-06 |
| 1460390_at   | sortilin-related receptor, LDLR class A r   | Sorl1          | 6.76  | 4.15E-09 |
| 1442226_at   | sema domain, immunoglobulin domain (I       | Sema3e         | 6.73  | 5.57E-05 |
| 1453721_a_at | solute carrier family 31, member 2          | Slc31a2        | 6.73  | 2.40E-10 |
| 1421276_a_at | dystonin                                    | Dst            | 6.72  | 1.62E-13 |
| 1421931_at   | inducible T-cell co-stimulator              | Icos           | 6.72  | 8.38E-13 |
| 1440290_at   | predicted gene 10010                        | Gm10010        | -6.70 | 1.47E-06 |
| 1442881_at   | ---                                         | ---            | -6.68 | 7.83E-04 |
| 1445144_at   | ---                                         | ---            | 6.67  | 6.09E-09 |
| 1437750_at   | Transmembrane protein 158                   | Tmem158        | -6.66 | 4.88E-10 |
| 1417409_at   | Jun oncogene                                | Jun            | -6.65 | 1.33E-05 |
| 1439768_x_at | sema domain, immunoglobulin domain (I       | Sema4f         | -6.63 | 1.70E-05 |
| 1439343_at   | ---                                         | ---            | 6.61  | 1.00E-07 |
| 1449134_s_at | Spi-C transcription factor (Spi-1/PU.1 rel  | Spic           | 6.60  | 4.90E-10 |
| 1423024_at   | SH2 domain protein 1B1                      | Sh2d1b1        | 6.60  | 4.53E-11 |
| 1448530_at   | guanosine monophosphate reductase /// s     | Gmpr /// LC    | -6.59 | 2.11E-08 |
| 1423084_at   | UDP-Gal:betaGlcNAc beta 1,3-galactosy       | B3galt2        | 6.58  | 1.09E-07 |
| 1428444_at   | ankyrin repeat and SOCS box-containing      | Asb2           | 6.57  | 1.25E-07 |
| 1435771_at   | phospholipase C, beta 4                     | Plcb4          | 6.55  | 7.70E-09 |
| 1440650_at   | ---                                         | ---            | 6.55  | 1.03E-08 |
| 1450913_at   | UDP-Gal:betaGlcNAc beta 1,4-galactosy       | B4galt6        | 6.54  | 8.59E-07 |
| 1421113_at   | pepsinogen 5, group I                       | Pga5           | 6.52  | 2.94E-09 |
| 1435758_at   | UDP-Gal:betaGlcNAc beta 1,4-galactosy       | B4galt6        | 6.50  | 1.75E-09 |
| 1450692_at   | kinesin family member 4                     | Kif4           | -6.49 | 1.44E-03 |
| 1444104_at   | ---                                         | ---            | 6.46  | 3.90E-09 |
| 1434537_at   | solute carrier organic anion transporter fa | Slco3a1        | 6.44  | 4.86E-04 |
| 1415949_at   | carboxypeptidase E /// similar to carboxy   | Cpe /// LOC    | -6.42 | 1.85E-08 |
| 1427313_at   | prostaglandin I receptor (IP)               | Ptgir          | 6.41  | 3.47E-09 |



|              |                                            |          |       |          |
|--------------|--------------------------------------------|----------|-------|----------|
| 1435554_at   | transmembrane and coiled coil domains 3    | Tmcc3    | 6.41  | 1.75E-08 |
| 1444165_at   | layilin                                    | Layn     | 6.41  | 1.96E-07 |
| 1446553_at   | ---                                        | ---      | -6.40 | 1.35E-08 |
| 1422957_at   | chemokine (C-C motif) receptor 3           | Ccr3     | -6.38 | 2.31E-08 |
| 1419137_at   | SH3/ankyrin domain gene 3                  | Shank3   | -6.36 | 2.45E-09 |
| 1417129_a_at | Meis homeobox 2                            | Meis2    | 6.36  | 6.41E-11 |
| 1418392_a_at | guanylate binding protein 3                | Gbp3     | 6.35  | 1.26E-08 |
| 1433600_at   | adrenergic receptor, alpha 2a              | Adra2a   | -6.35 | 1.86E-06 |
| 1427327_at   | paired immunoglobulin-like type 2 receptor | Pilra    | 6.35  | 8.69E-07 |
| 1459238_at   | ---                                        | ---      | 6.34  | 3.36E-10 |
| 1417297_at   | inositol 1,4,5-triphosphate receptor 3     | Itpr3    | 6.34  | 5.25E-09 |
| 1448830_at   | dual specificity phosphatase 1             | Dusp1    | -6.33 | 1.22E-06 |
| 1437405_a_at | insulin-like growth factor binding protein | Igfbp4   | 6.32  | 2.89E-06 |
| 1452073_at   | family with sequence similarity 64, mem    | Fam64a   | -6.32 | 8.76E-05 |
| 1418004_a_at | transmembrane protein 176B                 | Tmem176b | -6.32 | 4.16E-07 |
| 1416309_at   | nucleolar and spindle associated protein   | Nusap1   | -6.32 | 1.22E-07 |
| 1430320_at   | dystrophin, muscular dystrophy             | Dmd      | -6.31 | 3.51E-08 |
| 1419594_at   | cathepsin G                                | Ctsg     | 6.30  | 7.81E-08 |
| 1415973_at   | myristoylated alanine rich protein kinase  | Marcks   | 6.29  | 1.55E-09 |
| 1423909_at   | transmembrane protein 176A                 | Tmem176a | -6.25 | 4.29E-06 |
| 1416654_at   | solute carrier family 31, member 2         | Slc31a2  | 6.23  | 4.94E-11 |
| 1455450_at   | protein tyrosine phosphatase, non-recept   | Ptpn3    | 6.22  | 7.32E-09 |
| 1417701_at   | protein phosphatase 1, regulatory (inhibit | Ppp1r14c | -6.20 | 4.97E-08 |
| 1426817_at   | antigen identified by monoclonal antibod   | Mki67    | -6.19 | 8.78E-09 |
| 1442322_at   | ---                                        | ---      | 6.18  | 1.46E-07 |
| 1428988_at   | ATP-binding cassette, sub-family C (CF     | Abcc3    | 6.16  | 7.62E-08 |
| 1417574_at   | chemokine (C-X-C motif) ligand 12          | Cxcl12   | -6.16 | 3.71E-04 |
| 1439377_x_at | cell division cycle 20 homolog (S. cerevi  | Cdc20    | -6.16 | 4.72E-07 |
| 1442481_at   | predicted gene 9648                        | Gm9648   | -6.16 | 4.42E-04 |
| 1446392_at   | ---                                        | ---      | 6.15  | 4.43E-06 |
| 1436259_at   | ---                                        | ---      | 6.13  | 1.71E-12 |
| 1418406_at   | phosphodiesterase 8A                       | Pde8a    | 6.11  | 2.92E-11 |
| 1423602_at   | TNF receptor-associated factor 1           | Traf1    | 6.06  | 4.91E-09 |
| 1451733_at   | glucosaminyl (N-acetyl) transferase 2, I-h | Gent2    | 6.06  | 1.84E-05 |
| 1423557_at   | interferon gamma receptor 2                | Ifngr2   | 6.05  | 1.13E-06 |
| 1455900_x_at | transglutaminase 2, C polypeptide          | Tgm2     | -6.04 | 2.15E-09 |
| 1459665_s_at | MRV integration site 1                     | Mrvi1    | -6.04 | 2.07E-05 |
| 1417542_at   | ribosomal protein S6 kinase, polypeptide   | Rps6ka2  | -6.03 | 2.16E-08 |
| 1451161_a_at | EGF-like module containing, mucin-like,    | Emr1     | 6.02  | 4.37E-08 |
| 1435596_at   | pigeon homolog (Drosophila)                | Pion     | 6.01  | 2.34E-06 |
| 1446943_at   | ---                                        | ---      | 5.99  | 8.73E-07 |
| 1452004_at   | calcitonin/calcitonin-related polypeptide, | Calca    | -5.98 | 2.10E-05 |
| 1427222_a_at | seminal vesicle secretory protein 4        | Svs4     | -5.97 | 6.42E-05 |
| 1455101_at   | phosphatase and actin regulator 2          | Phactr2  | -5.96 | 2.01E-07 |
| 1437492_at   | mohawk homeobox                            | Mkx      | 5.93  | 1.58E-07 |
| 1438366_x_at | chloride channel 3                         | Clcn3    | 5.92  | 9.87E-09 |
| 1425624_at   | EPM2A (laforin) interacting protein 1      | Epm2aip1 | -5.91 | 5.39E-07 |

|              |                                                               |            |       |          |
|--------------|---------------------------------------------------------------|------------|-------|----------|
| 1459205_at   | ---                                                           | ---        | 5.91  | 9.12E-10 |
| 1423100_at   | FBJ osteosarcoma oncogene                                     | Fos        | -5.91 | 1.26E-07 |
| 1438763_at   | dynein, axonemal, heavy chain 2                               | Dnahc2     | -5.91 | 1.05E-06 |
| 1453419_at   | muscle and microspikes RAS                                    | Mras       | 5.90  | 1.20E-05 |
| 1433741_at   | CD38 antigen                                                  | Cd38       | -5.90 | 4.62E-05 |
| 1436037_at   | integrin alpha 4                                              | Itga4      | 5.87  | 3.50E-10 |
| 1419207_at   | zinc finger protein 37                                        | Zfp37      | 5.86  | 1.34E-06 |
| 1421562_at   | CD209c antigen                                                | Cd209c     | -5.83 | 2.06E-06 |
| 1438975_x_at | zinc finger, DHHC domain containing 14                        | Zdhhc14    | -5.83 | 6.93E-06 |
| 1443814_x_at | cathepsin H                                                   | Ctsh       | 5.83  | 1.49E-06 |
| 1427628_at   | T-cell receptor beta, variable 8.2                            | Tcrb-V8.2  | -5.81 | 2.10E-09 |
| 1456498_at   | integrin alpha 4                                              | Itga4      | 5.80  | 1.08E-09 |
| 1440634_at   | ---                                                           | ---        | 5.79  | 2.23E-11 |
| 1435605_at   | ARP3 actin-related protein 3 homolog B                        | Actr3b     | 5.78  | 2.02E-06 |
| 1434372_at   | expressed sequence AW112010                                   | AW112010   | 5.78  | 9.04E-10 |
| 1458322_x_at | RIKEN cDNA E230008N13 gene                                    | E230008N13 | -5.77 | 3.53E-04 |
| 1456077_x_at | cell division cycle 25 homolog C (S. pombe)                   | Cdc25c     | -5.76 | 1.15E-04 |
| 1440527_at   | ---                                                           | ---        | 5.75  | 7.92E-09 |
| 1425919_at   | NADH dehydrogenase (ubiquinone) 1 alpha subunit               | Ndufa12    | -5.75 | 1.70E-05 |
| 1417399_at   | growth arrest specific 6                                      | Gas6       | -5.74 | 1.77E-08 |
| 1433891_at   | leucine-rich repeat-containing G protein-coupled receptor 4   | Lgr4       | -5.73 | 1.89E-09 |
| 1425484_at   | thymocyte selection-associated high mobility group protein 1  | Tox        | -5.71 | 4.51E-08 |
| 1438676_at   | macrophage activation 2 like                                  | Mpa2l      | -5.71 | 3.33E-08 |
| 1417589_at   | UDP-N-acetyl-alpha-D-galactosamine:polysaccharide 4-epimerase | Galnt3     | -5.70 | 4.21E-07 |
| 1429656_at   | Rho-related BTB domain containing 1                           | Rhobtb1    | -5.70 | 1.01E-04 |
| 1451503_at   | nucleolar protein 3 (apoptosis repressor vimentin)            | Nol3       | 5.68  | 2.87E-04 |
| 1459872_x_at | histocompatibility 2, class II, locus DMA                     | H2-DMA     | 5.68  | 7.39E-10 |
| 1419088_at   | tissue inhibitor of metalloproteinase 3                       | Timp3      | -5.67 | 4.82E-08 |
| 1417377_at   | cell adhesion molecule 1                                      | Cadm1      | -5.66 | 2.39E-06 |
| 1450156_a_at | hyaluronan mediated motility receptor (R)                     | Hmmr       | -5.64 | 4.34E-06 |
| 1422527_at   | histocompatibility 2, class II, locus DMA                     | H2-DMA     | 5.63  | 6.34E-09 |
| 1417389_at   | glypican 1                                                    | Gpc1       | 5.63  | 5.93E-07 |
| 1452404_at   | phosphatase and actin regulator 2                             | Phactr2    | -5.59 | 6.47E-10 |
| 1452314_at   | kinesin family member 11                                      | Kif11      | -5.57 | 4.96E-06 |
| 1422814_at   | asp (abnormal spindle)-like, microcephaly 1                   | Aspm       | -5.57 | 5.60E-08 |
| 1458140_at   | slit homolog 2 (Drosophila)                                   | Slit2      | 5.57  | 9.36E-07 |
| 1429896_at   | RIKEN cDNA 5830408B19 gene                                    | 5830408B19 | -5.54 | 9.19E-11 |
| 1441284_at   | ---                                                           | ---        | -5.54 | 4.64E-08 |
| 1452166_a_at | keratin 10                                                    | Krt10      | 5.54  | 2.33E-05 |
| 1419486_at   | forkhead box C1                                               | Foxc1      | -5.53 | 3.46E-10 |
| 1452040_a_at | cell division cycle associated 3                              | Cdca3      | -5.53 | 1.83E-07 |
| 1450290_at   | programmed cell death 1 ligand 2                              | Pdcd1lg2   | 5.51  | 4.16E-07 |
| 1441895_x_at | ---                                                           | ---        | -5.51 | 5.75E-04 |
| 1435857_s_at | amyloid beta (A4) precursor-like protein                      | Aplp1      | 5.50  | 7.34E-06 |
| 1423756_s_at | insulin-like growth factor binding protein 4                  | Igfbp4     | 5.49  | 4.99E-09 |
| 1455695_at   | ST8 alpha-N-acetyl-neuraminide alpha-2 sialyltransferase      | St8sia1    | 5.45  | 2.57E-09 |
| 1437498_at   | predicted gene 9971                                           | Gm9971     | -5.44 | 4.87E-05 |

|              |                                             |             |       |          |
|--------------|---------------------------------------------|-------------|-------|----------|
| 1444616_x_at | predicted gene 2380                         | Gm2380      | 5.44  | 1.40E-09 |
| 1447927_at   | macrophage activation 2 like                | Mpa2l       | -5.44 | 1.34E-09 |
| 1454806_at   | family with sequence similarity 49, mem     | Fam49a      | 5.41  | 1.15E-07 |
| 1434515_at   | nuclear receptor coactivator 1              | Ncoa1       | -5.40 | 1.07E-07 |
| 1417836_at   | glutathione peroxidase 7                    | Gpx7        | 5.40  | 6.05E-08 |
| 1417378_at   | cell adhesion molecule 1                    | Cadm1       | -5.39 | 5.70E-06 |
| 1429947_a_at | Z-DNA binding protein 1                     | Zbp1        | 5.39  | 1.70E-11 |
| 1416258_at   | thymidine kinase 1                          | Tk1         | -5.39 | 8.46E-09 |
| 1438009_at   | predicted gene 11276 /// histone cluster 1  | Gm11276 /// | -5.39 | 2.98E-08 |
| 1449896_at   | melanophilin                                | Mlph        | -5.36 | 1.70E-08 |
| 1455418_at   | ---                                         | ---         | 5.35  | 4.48E-11 |
| 1427363_at   | ---                                         | ---         | -5.35 | 6.15E-05 |
| 1460251_at   | Fas (TNF receptor superfamily member 6)     | Fas         | 5.35  | 1.18E-11 |
| 1457140_s_at | Ras association (RalGDS/AF-6) domain        | Rassf10     | 5.34  | 2.56E-09 |
| 1453226_at   | kinesin family member 18B                   | Kif18b      | -5.33 | 6.35E-04 |
| 1432960_at   | RIKEN cDNA 4930447I22 gene                  | 4930447I22  | -5.33 | 1.64E-05 |
| 1425951_a_at | C-type lectin domain family 4, member n     | Clec4n      | -5.30 | 6.68E-09 |
| 1426071_at   | TGF-beta1-induced anti-apoptotic factor     | Tiaf2       | -5.29 | 8.69E-05 |
| 1430581_at   | BCL2-associated transcription factor 1      | Bclaf1      | -5.29 | 3.40E-08 |
| 1436243_at   | FERM domain containing 5                    | Frmd5       | -5.28 | 2.20E-04 |
| 1419031_at   | fatty acid desaturase 2                     | Fads2       | -5.28 | 2.20E-08 |
| 1437173_at   | sphingosine-1-phosphate receptor 3          | S1pr3       | 5.28  | 8.50E-06 |
| 1433883_at   | tropomyosin 4                               | Tpm4        | 5.27  | 2.37E-11 |
| 1434091_at   | fatty acid amide hydrolase                  | Faah        | 5.26  | 2.74E-07 |
| 1449033_at   | tumor necrosis factor receptor superfamily  | Tnfrsf11b   | 5.22  | 2.30E-09 |
| 1442599_at   | solute carrier family 12 (potassium/chlori  | Slc12a9     | 5.20  | 1.91E-06 |
| 1441438_at   | glypican 6                                  | Gpc6        | 5.20  | 6.00E-04 |
| 1452913_at   | Purkinje cell protein 4-like 1              | Pcp4l1      | 5.20  | 2.42E-05 |
| 1452242_at   | centrosomal protein 55                      | Cep55       | -5.19 | 1.49E-06 |
| 1421304_at   | killer cell lectin-like receptor, subfamily | Klra2       | 5.17  | 6.05E-08 |
| 1423775_s_at | protein regulator of cytokinesis 1          | Prc1        | -5.17 | 1.54E-09 |
| 1450435_at   | L1 cell adhesion molecule                   | L1cam       | 5.17  | 1.45E-06 |
| 1442586_at   | suppressor of cytokine signaling 2          | Socs2       | 5.16  | 3.48E-07 |
| 1416299_at   | Shc SH2-domain binding protein 1            | Shcbp1      | -5.15 | 4.71E-10 |
| 1418949_at   | growth differentiation factor 15            | Gdf15       | -5.14 | 1.58E-06 |
| 1449335_at   | tissue inhibitor of metalloproteinase 3     | Timp3       | -5.13 | 2.41E-09 |
| 1434447_at   | met proto-oncogene                          | Met         | 5.13  | 3.43E-05 |
| 1423774_a_at | protein regulator of cytokinesis 1          | Prc1        | -5.13 | 1.88E-09 |
| 1446258_at   | Riken cDNA 9530067D14 gene                  | 9530067D14  | 5.13  | 3.30E-08 |
| 1419283_s_at | tensin 1                                    | Tns1        | -5.11 | 2.42E-06 |
| 1417911_at   | cyclin A2                                   | Ccna2       | -5.10 | 3.99E-10 |
| 1450160_at   | leukemia inhibitory factor                  | Lif         | -5.10 | 4.59E-04 |
| 1448918_at   | solute carrier organic anion transporter fa | Slco3a1     | 5.09  | 6.14E-08 |
| 1434252_at   | transmembrane and coiled coil domains 3     | Tmcc3       | 5.09  | 7.90E-12 |
| 1420547_at   | galactosylceramidase                        | Galc        | -5.09 | 4.01E-04 |
| 1424727_at   | chemokine (C-C motif) receptor 5            | Ccr5        | 5.08  | 8.62E-05 |
| 1445452_at   | TNF receptor-associated factor 1            | Traf1       | 5.07  | 1.89E-08 |

|              |                                             |           |       |          |
|--------------|---------------------------------------------|-----------|-------|----------|
| 1418407_at   | phosphodiesterase 8A                        | Pde8a     | 5.06  | 8.74E-08 |
| 1435331_at   | pyrin and HIN domain family, member 1       | Pyhin1    | 5.06  | 1.38E-08 |
| 1449147_at   | carbohydrate (keratan sulfate Gal-6) sulf   | Chst1     | -5.05 | 1.40E-07 |
| 1423590_at   | napsin A aspartic peptidase                 | Napsa     | 5.04  | 6.78E-11 |
| 1453674_at   | glucosaminyl (N-acetyl) transferase 2, I-l  | Gent2     | 5.04  | 4.90E-05 |
| 1416155_at   | high mobility group box 3                   | Hmgb3     | -5.03 | 6.49E-09 |
| 1420065_at   | Transketolase-like 1                        | Tktl1     | 5.03  | 2.16E-08 |
| 1415899_at   | Jun-B oncogene                              | Junb      | -5.01 | 1.56E-05 |
| 1448314_at   | cyclin-dependent kinase 1                   | Cdk1      | -5.01 | 6.34E-08 |
| 1441311_at   | ribosomal protein S6 kinase, polypeptide    | Rps6ka2   | -5.01 | 1.32E-05 |
| 1437614_x_at | zinc finger, DHHC domain containing 14      | Zdhhc14   | -5.01 | 1.16E-05 |
| 1443458_at   | RIKEN cDNA D630033O11 gene                  | D630033O1 | 5.00  | 1.78E-03 |
| 1419315_at   | SLAM family member 9                        | Slamf9    | 5.00  | 6.34E-09 |
| 1456634_at   | RIKEN cDNA 9830001H06 gene                  | 9830001H0 | -5.00 | 9.81E-04 |
| 1435743_at   | kelch-like 23 (Drosophila)                  | Klhl23    | -5.00 | 1.57E-09 |
| 1443319_at   | phosphoprotein associated with glycosph     | Pag1      | -5.00 | 2.18E-10 |
| 1417818_at   | WW domain containing transcription reg      | Wwtr1     | 4.99  | 2.01E-05 |
| 1447108_at   | ---                                         | ---       | 4.99  | 3.24E-07 |
| 1433010_at   | RIKEN cDNA 5530400N10 gene                  | 5530400N1 | 4.95  | 5.28E-11 |
| 1419161_a_at | NADPH oxidase 4                             | Nox4      | -4.95 | 3.42E-08 |
| 1417801_a_at | PTPRF interacting protein, binding prote    | Ppfibp2   | 4.95  | 3.76E-10 |
| 1427974_s_at | calcium channel, voltage-dependent, L ty    | Cacna1d   | 4.94  | 1.37E-09 |
| 1449405_at   | tensin 1                                    | Tns1      | -4.94 | 2.94E-06 |
| 1440801_s_at | adrenergic receptor kinase, beta 2          | Adrbk2    | 4.93  | 6.77E-08 |
| 1432520_at   | immunoglobulin heavy chain (J558 famil      | Igh-VJ558 | -4.93 | 1.56E-04 |
| 1459098_at   | ---                                         | ---       | 4.92  | 1.01E-10 |
| 1451451_at   | grancalcin                                  | Gca       | 4.91  | 1.13E-07 |
| 1460329_at   | UDP-Gal:betaGlcNAc beta 1,4-galactosy       | B4galt6   | 4.91  | 4.68E-07 |
| 1437277_x_at | transglutaminase 2, C polypeptide           | Tgm2      | -4.91 | 3.74E-09 |
| 1427009_at   | laminin, alpha 5                            | Lama5     | 4.91  | 5.46E-08 |
| 1435306_a_at | kinesin family member 11                    | Kif11     | -4.90 | 1.13E-05 |
| 1417543_at   | ribosomal protein S6 kinase, polypeptide    | Rps6ka2   | -4.90 | 1.47E-09 |
| 1439997_at   | synaptojanin 1                              | Synj1     | -4.90 | 1.89E-06 |
| 1421430_at   | RAD51-like 1 (S. cerevisiae)                | Rad51l1   | 4.88  | 4.02E-08 |
| 1416673_at   | beta-site APP-cleaving enzyme 2             | Bace2     | -4.87 | 3.27E-11 |
| 1418982_at   | CCAAT/enhancer binding protein (C/EB        | Cebpa     | -4.87 | 2.57E-07 |
| 1436203_a_at | RIKEN cDNA 1110059G02 gene                  | 1110059G0 | 4.85  | 8.96E-08 |
| 1456258_at   | empty spiracles homolog 2 (Drosophila)      | Emx2      | 4.85  | 5.56E-08 |
| 1430476_at   | signal recognition particle 54B             | Srp54b    | -4.84 | 4.04E-09 |
| 1441811_x_at | transmembrane protein 176A                  | Tmem176a  | -4.82 | 5.04E-07 |
| 1417376_a_at | cell adhesion molecule 1                    | Cadm1     | -4.82 | 2.58E-06 |
| 1418365_at   | cathepsin H                                 | Ctsh      | 4.81  | 3.25E-04 |
| 1442531_at   | DNA segment, Chr 12, ERATO Doi 123          | D12Erd123 | 4.80  | 3.69E-07 |
| 1425412_at   | NLR family, pyrin domain containing 3       | Nlrp3     | -4.79 | 5.83E-09 |
| 1437356_at   | G protein-coupled receptor 183              | Gpr183    | 4.79  | 2.19E-09 |
| 1433933_s_at | solute carrier organic anion transporter fa | Slco2b1   | 4.78  | 8.09E-07 |
| 1446599_at   | ---                                         | ---       | 4.77  | 1.04E-04 |

|              |                                             |              |       |          |
|--------------|---------------------------------------------|--------------|-------|----------|
| 1424112_at   | insulin-like growth factor 2 receptor       | Igf2r        | -4.74 | 2.11E-04 |
| 1458075_at   | ---                                         | ---          | 4.74  | 4.09E-06 |
| 1420018_s_at | tetraspanin 8                               | Tspan8       | -4.74 | 1.97E-08 |
| 1425814_a_at | calcitonin receptor-like                    | Calcr1       | 4.73  | 6.74E-10 |
| 1426818_at   | arrestin domain containing 4                | Arrdc4       | 4.71  | 3.99E-05 |
| 1441015_at   | ---                                         | ---          | -4.71 | 1.59E-06 |
| 1423877_at   | chromatin assembly factor 1, subunit B (p   | Chaf1b       | -4.70 | 1.11E-10 |
| 1457961_at   | ---                                         | ---          | -4.69 | 2.58E-08 |
| 1436789_at   | cyclin J-like                               | Ccnj1        | -4.69 | 1.73E-03 |
| 1418936_at   | v-maf musculoaponeurotic fibrosarcoma       | Maff         | -4.68 | 5.66E-05 |
| 1421570_at   | interleukin 9 receptor                      | Il9r         | 4.68  | 7.13E-05 |
| 1456280_at   | claspin homolog (Xenopus laevis)            | Clspn        | -4.68 | 4.97E-07 |
| 1447643_x_at | snail homolog 2 (Drosophila)                | Snai2        | -4.68 | 9.80E-07 |
| 1448213_at   | annexin A1                                  | Anxa1        | 4.67  | 8.53E-08 |
| 1419627_s_at | C-type lectin domain family 4, member n     | Clec4n       | -4.66 | 2.45E-06 |
| 1418941_at   | protocadherin beta 22                       | Pcdhb22      | 4.66  | 2.41E-06 |
| 1455869_at   | ---                                         | ---          | -4.66 | 2.55E-05 |
| 1457843_at   | LY6/PLAUR domain containing 6               | Lypd6        | 4.66  | 1.59E-03 |
| 1449297_at   | caspase 12                                  | Casp12       | -4.66 | 1.19E-05 |
| 1419744_at   | histocompatibility 2, class II, locus Mb2   | H2-DMb2      | 4.66  | 1.44E-07 |
| 1447856_x_at | solute carrier family 25 (mitochondrial ca  | Slc25a25     | -4.66 | 3.39E-07 |
| 1416021_a_at | fatty acid binding protein 5, epidermal /// | Fabp5 /// Gr | -4.64 | 8.63E-08 |
| 1453069_at   | phosphatidylinositol 3-kinase, catalytic, h | Pik3cb       | 4.64  | 2.59E-09 |
| 1415874_at   | similar to sprouty 1 /// sprouty homolog 1  | LOC100046    | -4.63 | 8.88E-05 |
| 1446293_at   | ---                                         | ---          | 4.63  | 9.24E-09 |
| 1456139_at   | antisense Igf2r RNA                         | Airn         | -4.62 | 3.11E-04 |
| 1446431_at   | ---                                         | ---          | 4.61  | 2.99E-06 |
| 1416076_at   | cyclin B1 /// predicted gene 5593 /// pred  | Ccnb1 /// Gr | -4.60 | 2.23E-04 |
| 1425553_s_at | huntingtin interacting protein 1 related    | Hip1r        | 4.60  | 2.24E-07 |
| 1443227_at   | basic leucine zipper and W2 domains 2       | Bzw2         | -4.59 | 6.22E-08 |
| 1436204_at   | RIKEN cDNA 1110059G02 gene                  | 1110059G0    | 4.59  | 2.76E-07 |
| 1420017_at   | tetraspanin 8                               | Tspan8       | -4.58 | 4.69E-09 |
| 1423467_at   | membrane-spanning 4-domains, subfamil       | Ms4a4b       | 4.58  | 1.27E-09 |
| 1437846_x_at | beta-site APP-cleaving enzyme 2             | Bace2        | -4.58 | 1.09E-04 |
| 1452220_at   | dedicator of cytokinesis 1                  | Dock1        | -4.57 | 6.22E-07 |
| 1451866_a_at | hepatocyte growth factor                    | Hgf          | -4.57 | 1.67E-08 |
| 1421221_at   | beta-carotene oxygenase 2                   | Bco2         | 4.56  | 2.99E-08 |
| 1422398_at   | histone cluster 1, H1e                      | Hist1h1e     | -4.54 | 8.64E-07 |
| 1424975_at   | sialic acid binding Ig-like lectin 5        | Siglec5      | -4.54 | 2.61E-04 |
| 1433543_at   | anillin, actin binding protein              | Anln         | -4.53 | 1.40E-08 |
| 1434809_at   | Rho GTPase activating protein 28            | Arhgap28     | -4.53 | 7.34E-04 |
| 1424567_at   | tetraspanin 2                               | Tspan2       | 4.53  | 8.99E-08 |
| 1424659_at   | slit homolog 2 (Drosophila)                 | Slit2        | 4.53  | 3.82E-07 |
| 1425483_at   | thymocyte selection-associated high mob     | Tox          | -4.51 | 1.70E-04 |
| 1444690_at   | Eph receptor A5                             | Epha5        | 4.50  | 4.31E-07 |
| 1453082_at   | tubby-like protein 3                        | Tulp3        | -4.50 | 7.08E-09 |
| 1435575_at   | kinetochore associated 1                    | Kntc1        | -4.49 | 6.62E-07 |

|              |                                             |            |       |          |
|--------------|---------------------------------------------|------------|-------|----------|
| 1453244_at   | RIKEN cDNA 5830416P10 gene                  | 5830416P10 | 4.49  | 1.54E-08 |
| 1452654_at   | zinc finger, DHHC domain containing 2       | Zdhhc2     | -4.48 | 4.24E-06 |
| 1454777_at   | solute carrier organic anion transporter fa | Slco2b1    | 4.47  | 1.32E-06 |
| 1425281_a_at | TSC22 domain family, member 3               | Tsc22d3    | -4.47 | 7.14E-08 |
| 1440200_at   | family with sequence similarity 184, mem    | Fam184b    | -4.47 | 2.72E-11 |
| 1442878_at   | peroxiredoxin 6                             | Prdx6      | -4.47 | 1.51E-08 |
| 1440248_at   | cancer susceptibility candidate 4           | Casc4      | -4.47 | 1.52E-06 |
| 1452459_at   | asp (abnormal spindle)-like, microcephal    | Aspm       | -4.46 | 2.00E-04 |
| 1427749_at   | UDP-N-acetyl-alpha-D-galactosamine:pc       | Galnt3     | -4.46 | 1.73E-03 |
| 1417481_at   | receptor (calcitonin) activity modifying p  | Ramp1      | -4.46 | 2.09E-05 |
| 1428622_at   | DEP domain containing 6                     | Depdc6     | -4.45 | 1.46E-10 |
| 1438027_at   | ---                                         | ---        | -4.45 | 4.59E-08 |
| 1454435_at   | ---                                         | ---        | 4.44  | 1.17E-04 |
| 1445895_at   | ---                                         | ---        | -4.44 | 3.54E-09 |
| 1453861_at   | family with sequence similarity 78, mem     | Fam78b     | -4.44 | 5.52E-08 |
| 1435286_at   | Eph receptor A5                             | Epha5      | 4.44  | 2.69E-09 |
| 1419944_at   | Cyclin B1                                   | Ccnb1      | -4.43 | 8.49E-07 |
| 1444347_at   | mannoside acetylglucosaminyltransferase     | Mgat4a     | 4.42  | 3.63E-06 |
| 1448205_at   | cyclin B1                                   | Ccnb1      | -4.41 | 7.68E-09 |
| 1438288_x_at | RIKEN cDNA 1110059G02 gene                  | 1110059G02 | 4.41  | 9.77E-08 |
| 1416630_at   | inhibitor of DNA binding 3                  | Id3        | -4.40 | 1.50E-07 |
| 1419089_at   | tissue inhibitor of metalloproteinase 3     | Timp3      | -4.40 | 4.56E-08 |
| 1429169_at   | RNA binding motif protein 3                 | Rbm3       | 4.40  | 3.75E-08 |
| 1416325_at   | cysteine-rich secretory protein 1           | Crisp1     | 4.38  | 3.57E-06 |
| 1420747_at   | per-pentamer repeat gene                    | Ppnr       | 4.38  | 6.45E-05 |
| 1440721_at   | RIKEN cDNA 5930433N17 gene                  | 5930433N17 | 4.38  | 7.22E-07 |
| 1455435_s_at | choline dehydrogenase                       | Chdh       | 4.38  | 3.51E-13 |
| 1455337_at   | FYVE, RhoGEF and PH domain contain          | Fgd4       | 4.38  | 3.60E-08 |
| 1438619_x_at | zinc finger, DHHC domain containing 14      | Zdhhc14    | -4.37 | 9.84E-06 |
| 1443969_at   | insulin receptor substrate 2                | Irs2       | -4.37 | 1.25E-06 |
| 1444516_at   | ---                                         | ---        | 4.37  | 3.29E-08 |
| 1420019_at   | Tetraspanin 8                               | Tspan8     | -4.36 | 3.69E-11 |
| 1439040_at   | centromere protein E                        | Cenpe      | -4.35 | 1.89E-07 |
| 1438081_at   | mutated in colorectal cancers               | Mcc        | 4.35  | 2.43E-05 |
| 1431213_a_at | predicted gene 3579                         | Gm3579     | -4.34 | 7.00E-07 |
| 1430386_at   | peptidylprolyl isomerase A pseudogene 8     | E030024N2  | 4.34  | 8.22E-07 |
| 1443308_at   | unc-13 homolog B (C. elegans)               | Unc13b     | -4.34 | 1.69E-09 |
| 1431688_at   | hypothetical LOC73899                       | LOC73899   | 4.32  | 6.36E-08 |
| 1420081_s_at | DNA segment, Chr 2, ERATO Doi 750,          | D2Ertd750e | -4.32 | 4.26E-07 |
| 1416610_a_at | chloride channel 3                          | Clcn3      | 4.31  | 3.73E-08 |
| 1416832_at   | solute carrier family 39 (metal ion transp  | Slc39a8    | -4.30 | 1.75E-08 |
| 1420082_at   | DNA segment, Chr 2, ERATO Doi 750,          | D2Ertd750e | -4.30 | 7.19E-07 |
| 1442771_at   | ---                                         | ---        | 4.29  | 3.27E-05 |
| 1433670_at   | epithelial membrane protein 2               | Emp2       | 4.29  | 4.49E-04 |
| 1459993_at   | ---                                         | ---        | -4.29 | 1.04E-05 |
| 1422498_at   | melanoma antigen, family H, 1               | Mageh1     | -4.29 | 7.37E-07 |
| 1435987_x_at | RIKEN cDNA 1110059G02 gene                  | 1110059G02 | 4.29  | 6.02E-07 |

|              |                                            |              |       |          |
|--------------|--------------------------------------------|--------------|-------|----------|
| 1443579_s_at | DEP domain containing 6                    | Depdc6       | -4.28 | 1.90E-09 |
| 1428650_at   | tensin 1                                   | Tns1         | -4.28 | 1.78E-07 |
| 1422264_s_at | Kruppel-like factor 9                      | Klf9         | -4.28 | 7.60E-06 |
| 1428105_at   | TPX2, microtubule-associated protein ho    | Tpx2         | -4.28 | 1.43E-08 |
| 1438527_at   | predicted gene 12816 /// predicted gene 5  | Gm12816 //   | -4.26 | 1.63E-07 |
| 1417332_at   | regulatory factor X, 2 (influences HLA cl  | Rfx2         | -4.24 | 1.97E-08 |
| 1442263_at   | regulator of G-protein signaling 13        | Rgs13        | 4.24  | 2.09E-08 |
| 1423310_at   | trophoblast glycoprotein                   | Tpbg         | 4.23  | 4.18E-04 |
| 1419329_at   | sorbin and SH3 domain containing 3         | Sorbs3       | 4.23  | 8.52E-09 |
| 1428018_a_at | cDNA sequence AF251705                     | AF251705     | -4.23 | 1.24E-08 |
| 1449334_at   | tissue inhibitor of metalloproteinase 3    | Timp3        | -4.23 | 1.02E-08 |
| 1452291_at   | ArfGAP with RhoGAP domain, ankyrin 1       | Arap2        | 4.22  | 3.90E-08 |
| 1424076_at   | glycerophosphodiester phosphodiesterase    | Gdpd1        | -4.21 | 2.64E-08 |
| 1438593_at   | ---                                        | ---          | -4.21 | 6.05E-07 |
| 1446929_at   | RIKEN cDNA D130062J21 gene                 | D130062J2    | -4.19 | 1.10E-09 |
| 1447347_at   | ---                                        | ---          | 4.19  | 2.03E-04 |
| 1440285_at   | protein phosphatase 1, regulatory (inhibit | Ppp1r9a      | 4.18  | 1.26E-03 |
| 1439332_at   | DNA-damage-inducible transcript 4-like     | Ddit4l       | 4.18  | 8.83E-05 |
| 1417398_at   | related RAS viral (r-ras) oncogene homol   | Rras2        | -4.18 | 3.63E-07 |
| 1421963_a_at | cell division cycle 25 homolog B (S. pom   | Cdc25b       | -4.18 | 1.93E-07 |
| 1419689_at   | glypican 6                                 | Gpc6         | 4.17  | 1.86E-11 |
| 1422189_x_at | T-cell receptor gamma, variable 4          | Tcrg-V4      | -4.17 | 4.20E-08 |
| 1437782_at   | contactin associated protein-like 2        | Cntnap2      | -4.15 | 3.76E-07 |
| 1436755_at   | inter-alpha (globulin) inhibitor H5        | Itih5        | -4.15 | 1.07E-05 |
| 1417938_at   | RAD51 associated protein 1                 | Rad51ap1     | -4.14 | 1.01E-09 |
| 1426754_x_at | cytoskeleton-associated protein 4          | Ckap4        | -4.13 | 2.03E-09 |
| 1433575_at   | SRY-box containing gene 4                  | Sox4         | 4.13  | 1.12E-06 |
| 1454969_at   | LY6/PLAUR domain containing 6              | Lypd6        | 4.12  | 2.78E-07 |
| 1456559_at   | empty spiracles homolog 2 (Drosophila)     | Emx2os       | 4.12  | 5.18E-10 |
| 1442833_at   | DNA segment, Chr 15, ERATO Doi 30,         | D15Erdt30e   | -4.12 | 4.72E-07 |
| 1422118_at   | syncoilin                                  | Sync         | -4.12 | 9.19E-08 |
| 1460515_at   | RIKEN cDNA 8430419K02 gene                 | 8430419K0    | -4.11 | 1.97E-07 |
| 1444089_at   | spectrin beta 2                            | Spnb2        | -4.10 | 4.47E-08 |
| 1416756_at   | DnaJ (Hsp40) homolog, subfamily B, me      | Dnajb1       | -4.10 | 9.16E-05 |
| 1441946_at   | inter-alpha (globulin) inhibitor H5        | Itih5        | -4.09 | 4.91E-07 |
| 1434450_s_at | adrenergic receptor kinase, beta 2         | Adrbk2       | 4.09  | 4.91E-09 |
| 1455772_at   | progesterone receptor                      | Pgr          | -4.08 | 1.41E-08 |
| 1450272_at   | tumor necrosis factor (ligand) superfamil  | Tnfsf8       | 4.07  | 2.73E-08 |
| 1451348_at   | DEP domain containing 6                    | Depdc6       | -4.07 | 6.10E-08 |
| 1447434_at   | ---                                        | ---          | -4.06 | 2.48E-07 |
| 1417089_a_at | creatine kinase, mitochondrial 1, ubiquito | Ckmt1        | 4.06  | 1.64E-05 |
| 1425891_a_at | GH regulated TBC protein 1                 | Grtp1        | -4.06 | 7.24E-09 |
| 1431087_at   | SPC24, NDC80 kinetochore complex com       | Spc24        | -4.05 | 3.79E-06 |
| 1444425_at   | ---                                        | ---          | 4.05  | 4.79E-06 |
| 1439699_at   | ---                                        | ---          | -4.05 | 3.20E-08 |
| 1434399_at   | UDP-N-acetyl-alpha-D-galactosamine:pc      | Galnt6 /// L | 4.04  | 1.40E-07 |
| 1456481_at   | extended synaptotagmin-like protein 3      | Esyt3        | 4.04  | 1.01E-06 |

|              |                                           |            |       |          |
|--------------|-------------------------------------------|------------|-------|----------|
| 1448576_at   | interleukin 7 receptor                    | Il7r       | -4.04 | 2.41E-05 |
| 1454710_at   | serine peptidase inhibitor, Kazal type 2  | Spink2     | -4.03 | 8.21E-08 |
| 1450019_at   | chemokine (C-X3-C) receptor 1             | Cx3cr1     | -4.03 | 1.89E-06 |
| 1454889_x_at | transmembrane and coiled coil domains 3   | Tmcc3      | 4.02  | 9.91E-10 |
| 1450020_at   | chemokine (C-X3-C) receptor 1             | Cx3cr1     | -4.02 | 3.54E-06 |
| 1420802_at   | interleukin 13                            | Il13       | 4.02  | 3.63E-08 |
| 1435641_at   | mannoside acetylglucosaminyltransferase   | Mgat4a     | 4.02  | 5.80E-10 |
| 1450952_at   | phospholamban                             | Pln        | 4.02  | 1.60E-04 |
| 1448823_at   | chemokine (C-X-C motif) ligand 12         | Cxcl12     | -4.02 | 6.86E-07 |
| 1444143_at   | ---                                       | ---        | 4.01  | 3.16E-06 |
| 1447363_s_at | budding uninhibited by benzimidazoles 1   | Bub1b      | -4.01 | 3.72E-07 |
| 1419485_at   | forkhead box C1                           | Foxc1      | -4.01 | 2.74E-10 |
| 1456403_at   | phosphoprotein associated with glycosph   | Pag1       | -4.00 | 2.55E-07 |
| 1438151_x_at | zinc finger, DHHC domain containing 14    | Zdhhc14    | -4.00 | 3.17E-04 |
| 1417828_at   | aquaporin 8                               | Aqp8       | -4.00 | 6.95E-09 |
| 1445370_at   | ---                                       | ---        | 3.99  | 1.37E-08 |
| 1433833_at   | fibronectin type III domain containing 3B | Fndc3b     | 3.99  | 1.80E-09 |
| 1416918_at   | discs, large homolog 3 (Drosophila)       | Dlg3       | -3.98 | 7.13E-09 |
| 1441799_at   | RIKEN cDNA 6030422H21 gene                | 6030422H2  | -3.97 | 1.47E-08 |
| 1442884_at   | hepatocyte growth factor                  | Hgf        | -3.97 | 2.60E-08 |
| 1453016_at   | heat shock protein family B (small), mem  | Hspb11     | 3.97  | 9.00E-10 |
| 1427707_a_at | Scf/Tal1 interrupting locus               | Stil       | -3.97 | 6.13E-04 |
| 1455265_a_at | regulator of G-protein signaling 16       | Rgs16      | 3.96  | 1.85E-07 |
| 1433779_at   | cancer susceptibility candidate 4         | Casc4      | -3.96 | 3.96E-09 |
| 1421946_at   | C-reactive protein, pentraxin-related     | Crp        | -3.96 | 1.33E-07 |
| 1421913_at   | mitochondrial ribosomal protein L19       | Mrpl19     | -3.96 | 1.50E-06 |
| 1448037_at   | Zinc finger, CCHC domain containing 6     | Zcchc6     | -3.96 | 2.26E-06 |
| 1450521_a_at | T-cell receptor gamma, variable 4         | Tcrg-V4    | -3.96 | 3.05E-08 |
| 1419735_at   | casein kappa                              | Csn3       | 3.96  | 8.52E-05 |
| 1434253_s_at | transmembrane and coiled coil domains 3   | Tmcc3      | 3.96  | 8.13E-06 |
| 1459429_at   | kinectin 1                                | Ktn1       | -3.95 | 8.90E-04 |
| 1418104_at   | nuclear receptor interacting protein 3    | Nrip3      | -3.95 | 7.80E-09 |
| 1428995_at   | predicted gene 10345                      | Gm10345    | 3.94  | 4.43E-04 |
| 1448046_at   | Rab9 effector protein with kelch motifs   | Rabepk     | -3.94 | 2.94E-06 |
| 1436763_a_at | Kruppel-like factor 9                     | Klf9       | -3.94 | 6.08E-07 |
| 1428294_at   | zinc finger protein 259                   | Zfp259     | -3.93 | 1.58E-08 |
| 1448231_at   | FK506 binding protein 5                   | Fkbp5      | -3.93 | 2.79E-07 |
| 1439178_at   | adrenergic receptor kinase, beta 2        | Adrbk2     | 3.93  | 4.58E-08 |
| 1429097_at   | ring finger protein 150                   | Rnf150     | -3.93 | 6.94E-07 |
| 1435906_x_at | guanylate binding protein 2               | Gbp2       | 3.92  | 2.68E-11 |
| 1430841_at   | RIKEN cDNA 3300002P13 gene                | 3300002P13 | -3.92 | 7.03E-09 |
| 1435710_at   | expressed sequence AI661384               | AI661384   | -3.92 | 1.48E-06 |
| 1417596_at   | B9 protein domain 1                       | B9d1       | 3.91  | 1.29E-12 |
| 1450744_at   | elongation factor RNA polymerase II 2     | Ell2       | 3.91  | 1.09E-10 |
| 1418876_at   | forkhead box D1                           | Foxd1      | -3.90 | 1.29E-03 |
| 1453107_s_at | RIKEN cDNA 4933413G19 gene /// fork       | 4933413G1  | -3.89 | 8.22E-06 |
| 1429159_at   | inter-alpha (globulin) inhibitor H5       | Itih5      | -3.88 | 8.68E-08 |



|              |                                           |              |       |          |
|--------------|-------------------------------------------|--------------|-------|----------|
| 1458943_at   | ---                                       | ---          | -3.88 | 2.82E-07 |
| 1419695_at   | ST8 alpha-N-acetyl-neuraminide alpha-2    | St8sia1      | 3.87  | 3.67E-09 |
| 1446570_at   | ---                                       | ---          | 3.87  | 3.26E-07 |
| 1449325_at   | fatty acid desaturase 2                   | Fads2        | -3.84 | 2.24E-08 |
| 1422188_s_at | T-cell receptor gamma, variable 2 /// T-c | Tcrg-V2 ///  | -3.84 | 9.03E-08 |
| 1440090_at   | Solute carrier family 25, member 27       | Slc25a27     | 3.84  | 4.48E-06 |
| 1429418_at   | CDC14 cell division cycle 14 homolog B    | Cdc14b       | 3.84  | 1.25E-07 |
| 1442073_at   | inositol polyphosphate-1-phosphatase      | Inpp1        | 3.84  | 4.33E-07 |
| 1430065_at   | RIKEN cDNA A930005N03 gene                | A930005N0    | 3.83  | 2.95E-05 |
| 1437677_at   | ---                                       | ---          | -3.82 | 6.34E-12 |
| 1429089_s_at | RIKEN cDNA 2900026A02 gene                | 2900026A0    | -3.82 | 3.45E-06 |
| 1418240_at   | guanylate binding protein 2               | Gbp2         | 3.82  | 1.25E-11 |
| 1453344_at   | RIKEN cDNA 1810032O08 gene                | 1810032O0    | -3.82 | 5.85E-09 |
| 1446509_at   | spermine oxidase                          | Smox         | -3.81 | 1.60E-09 |
| 1431182_at   | heat shock protein 8 /// hypothetical LOC | Hspa8 /// LO | -3.81 | 4.92E-04 |
| 1418285_at   | ephrin B1                                 | Efnb1        | -3.80 | 1.21E-06 |
| 1454182_at   | RIKEN cDNA 5430417C01 gene                | 5430417C0    | -3.80 | 2.98E-04 |
| 1451796_s_at | histidine decarboxylase                   | Hdc          | -3.80 | 2.71E-08 |
| 1427010_s_at | laminin, alpha 5                          | Lama5        | 3.79  | 3.95E-07 |
| 1417235_at   | EH-domain containing 3                    | Ehd3         | 3.79  | 1.97E-07 |
| 1452181_at   | cytoskeleton-associated protein 4         | Ckap4        | -3.79 | 3.10E-09 |
| 1455889_at   | fatty acyl CoA reductase 2                | Far2         | -3.77 | 5.96E-08 |
| 1456138_at   | LY6/PLAUR domain containing 6             | Lypd6        | 3.77  | 2.49E-04 |
| 1424214_at   | prostate androgen-regulated mucin-like p  | Parm1        | 3.77  | 2.12E-10 |
| 1433487_at   | chloride channel 3                        | Clcn3        | 3.77  | 1.09E-06 |
| 1432878_at   | RIKEN cDNA 4930544N03 gene                | 4930544N0    | 3.76  | 9.22E-06 |
| 1453277_at   | RIKEN cDNA 3021401N23 gene                | 3021401N2    | 3.76  | 5.63E-04 |
| 1429831_at   | phosphoinositide-3-kinase adaptor protei  | Pik3ap1      | 3.76  | 9.08E-09 |
| 1441286_at   | predicted gene 13948                      | Gm13948      | 3.76  | 8.66E-04 |
| 1419493_a_at | tumor protein D52                         | Tpd52        | 3.75  | 1.63E-08 |
| 1447593_x_at | guanine nucleotide binding protein, alpha | Gnaq         | 3.74  | 5.07E-04 |
| 1423851_a_at | shisa homolog 2 (Xenopus laevis)          | Shisa2       | 3.73  | 1.44E-08 |
| 1439894_at   | RIKEN cDNA A730056I06 gene                | A730056I06   | -3.73 | 1.09E-09 |
| 1455396_at   | ATPase, class I, type 8B, member 1        | Atp8b1       | -3.73 | 2.32E-04 |
| 1432417_a_at | tetraspanin 2                             | Tspan2       | 3.73  | 1.31E-08 |
| 1452661_at   | transferrin receptor                      | Tfrc         | -3.73 | 3.71E-07 |
| 1439301_at   | ---                                       | ---          | 3.73  | 8.03E-07 |
| 1437100_x_at | proviral integration site 3               | Pim3         | -3.71 | 2.71E-07 |
| 1446562_at   | ---                                       | ---          | -3.70 | 2.07E-10 |
| 1435271_at   | interferon regulatory factor 3            | Irf3         | 3.69  | 4.70E-08 |
| 1457356_at   | ---                                       | ---          | -3.69 | 4.29E-05 |
| 1442157_at   | ---                                       | ---          | 3.69  | 1.67E-06 |
| 1450505_a_at | family with sequence similarity 134, men  | Fam134b      | 3.68  | 6.34E-11 |
| 1423521_at   | lamin B1                                  | Lmnb1        | -3.67 | 4.07E-07 |
| 1432431_s_at | MACRO domain containing 2                 | Macro2       | -3.67 | 5.65E-08 |
| 1456523_at   | predicted gene 2115                       | Gm2115       | -3.66 | 9.53E-04 |
| 1428667_at   | monoamine oxidase A                       | Maoa         | 3.66  | 3.73E-08 |

|              |                                            |            |       |          |
|--------------|--------------------------------------------|------------|-------|----------|
| 1459760_at   | NADH dehydrogenase (ubiquinone) Fe-S       | Ndufs4     | -3.66 | 6.14E-07 |
| 1435956_at   | FERM domain containing 5                   | Frmd5      | -3.66 | 2.79E-04 |
| 1449031_at   | Cbp/p300-interacting transactivator with   | Cited1     | -3.66 | 1.61E-06 |
| 1446423_at   | ---                                        | ---        | 3.66  | 3.90E-06 |
| 1457072_at   | B-cell CLL/lymphoma 11A (zinc finger p     | Bcl11a     | 3.65  | 8.95E-07 |
| 1429700_at   | RIKEN cDNA 3110040M04 gene                 | 3110040M0  | -3.64 | 1.77E-06 |
| 1438713_at   | Ras association (RalGDS/AF-6) domain       | Rassf8     | -3.64 | 7.25E-04 |
| 1448845_at   | ribonuclease P 25 subunit (human)          | Rpp25      | 3.63  | 1.12E-05 |
| 1454835_at   | EPM2A (laforin) interacting protein 1      | Epm2aip1   | -3.63 | 4.84E-07 |
| 1436879_x_at | alpha fetoprotein                          | Afp        | 3.63  | 9.89E-04 |
| 1418483_a_at | glycoprotein galactosyltransferase alpha   | Ggta1      | 3.62  | 6.79E-08 |
| 1455019_x_at | cytoskeleton-associated protein 4          | Ckap4      | -3.62 | 4.59E-08 |
| 1442280_at   | DNA segment, Chr 2, ERATO Doi 750,         | D2ErtD750e | -3.62 | 4.80E-04 |
| 1448899_s_at | RAD51 associated protein 1                 | Rad51ap1   | -3.62 | 1.64E-07 |
| 1457752_at   | expressed sequence AU014876                | AU014876   | 3.62  | 1.21E-03 |
| 1456367_at   | fucosyltransferase 8                       | Fut8       | -3.61 | 1.10E-08 |
| 1443464_at   | ---                                        | ---        | 3.61  | 8.36E-07 |
| 1420818_at   | src-like adaptor                           | Sla        | -3.60 | 3.06E-08 |
| 1416125_at   | FK506 binding protein 5                    | Fkbp5      | -3.59 | 8.80E-07 |
| 1435040_at   | interleukin-1 receptor-associated kinase 3 | Irak3      | 3.59  | 6.68E-12 |
| 1439917_at   | PDZ domain containing 8                    | Pdzd8      | -3.59 | 3.20E-06 |
| 1438658_a_at | sphingosine-1-phosphate receptor 3         | S1pr3      | 3.58  | 1.80E-07 |
| 1418311_at   | fructosamine 3 kinase                      | Fn3k       | -3.58 | 2.80E-07 |
| 1418349_at   | heparin-binding EGF-like growth factor     | Hbegf      | -3.58 | 1.91E-08 |
| 1437920_at   | Eph receptor A5                            | Epha5      | 3.57  | 1.85E-09 |
| 1417027_at   | tripartite motif-containing 2              | Trim2      | 3.57  | 2.39E-06 |
| 1436723_at   | centromere protein I                       | Cenpi      | -3.57 | 9.72E-05 |
| 1448325_at   | protein phosphatase 1, regulatory (inhibit | Ppp1r15a   | -3.56 | 1.01E-07 |
| 1421588_at   | tumor necrosis factor (ligand) superfamil  | Tnfsf14    | -3.56 | 1.67E-08 |
| 1419943_s_at | cyclin B1                                  | Ccnb1      | -3.56 | 7.27E-07 |
| 1428891_at   | prostate androgen-regulated mucin-like p   | Parm1      | 3.56  | 1.73E-05 |
| 1437406_x_at | insulin-like growth factor binding protein | Igfbp4     | 3.56  | 3.99E-07 |
| 1424649_a_at | tetraspanin 8                              | Tspan8     | -3.56 | 1.04E-10 |
| 1441576_at   | ---                                        | ---        | 3.56  | 7.26E-07 |
| 1437403_at   | sterile alpha motif domain containing 5    | Samd5      | -3.55 | 9.92E-09 |
| 1455697_at   | ---                                        | ---        | 3.55  | 9.58E-04 |
| 1441163_at   | mediator of RNA polymerase II transcrip    | Med12l     | -3.54 | 1.31E-09 |
| 1437226_x_at | MARCKS-like 1                              | Marcks1l   | -3.54 | 3.02E-04 |
| 1424735_at   | solute carrier family 25 (mitochondrial ca | Slc25a25   | -3.54 | 6.56E-05 |
| 1451827_a_at | NADPH oxidase 4                            | Nox4       | -3.53 | 1.28E-06 |
| 1460696_at   | cDNA sequence BC026585                     | BC026585   | 3.53  | 3.04E-09 |
| 1424568_at   | tetraspanin 2                              | Tspan2     | 3.52  | 4.93E-10 |
| 1448508_at   | TRAF3 interacting protein 2                | Traf3ip2   | 3.52  | 1.17E-11 |
| 1420064_s_at | transketolase-like 1                       | Tktl1      | 3.52  | 1.71E-06 |
| 1442820_at   | ---                                        | ---        | -3.51 | 1.13E-06 |
| 1457707_at   | multiple C2 domains, transmembrane 2       | Mctp2      | 3.51  | 1.39E-07 |
| 1448928_at   | histone deacetylase 6                      | Hdac6      | -3.51 | 7.14E-08 |

|              |                                             |            |       |          |
|--------------|---------------------------------------------|------------|-------|----------|
| 1437696_at   | cDNA sequence BC049807                      | BC049807   | 3.50  | 6.00E-09 |
| 1415849_s_at | stathmin 1                                  | Stmn1      | -3.50 | 3.81E-08 |
| 1416473_a_at | immunoglobulin superfamily, DCC subcl       | Igdcc4     | 3.50  | 8.76E-08 |
| 1424292_at   | DEP domain containing 1a                    | Depdc1a    | -3.49 | 1.55E-03 |
| 1423852_at   | shisa homolog 2 (Xenopus laevis)            | Shisa2     | 3.49  | 5.44E-09 |
| 1447457_at   | ---                                         | ---        | 3.49  | 4.75E-07 |
| 1438404_at   | ring finger protein 144A                    | Rnf144a    | -3.49 | 3.54E-05 |
| 1416442_at   | immediate early response 2                  | Ier2       | -3.49 | 4.03E-05 |
| 1431894_at   | inositol 1,4,5-triphosphate receptor intera | Ittrip     | -3.48 | 1.04E-04 |
| 1438911_at   | septin 7                                    | 40428      | -3.48 | 7.65E-08 |
| 1457996_at   | ---                                         | ---        | -3.48 | 6.27E-09 |
| 1429005_at   | malignant fibrous histiocytoma amplified    | Mfhas1     | -3.48 | 1.68E-08 |
| 1449382_at   | solute carrier family 6 (neurotransmitter t | Slc6a12    | -3.47 | 6.57E-09 |
| 1421605_a_at | aquaporin 9                                 | Aqp9       | 3.47  | 6.25E-06 |
| 1445665_at   | ---                                         | ---        | 3.47  | 1.18E-06 |
| 1416961_at   | budding uninhibited by benzimidazoles 1     | Bub1b      | -3.47 | 1.16E-05 |
| 1455792_x_at | necdin                                      | Ndn        | 3.46  | 8.57E-04 |
| 1419694_at   | ST8 alpha-N-acetyl-neuraminide alpha-2      | St8sia1    | 3.46  | 2.06E-05 |
| 1452847_at   | GATS protein-like 3                         | Gatsl3     | 3.46  | 3.16E-07 |
| 1457220_at   | Ras suppressor protein 1                    | Rsu1       | 3.46  | 2.38E-05 |
| 1450750_a_at | nuclear receptor subfamily 4, group A, m    | Nr4a2      | -3.46 | 7.71E-04 |
| 1427329_a_at | immunoglobulin heavy chain 6 (heavy ch      | Igh-6      | 3.45  | 2.26E-09 |
| 1447863_s_at | nuclear receptor subfamily 4, group A, m    | Nr4a2      | -3.45 | 5.20E-04 |
| 1443604_at   | ---                                         | ---        | -3.45 | 8.30E-07 |
| 1441030_at   | retinoic acid induced 14                    | Rai14      | 3.45  | 1.08E-05 |
| 1442347_at   | low density lipoprotein receptor-related p  | Lrp8       | -3.44 | 5.97E-09 |
| 1444120_at   | bridging integrator 1                       | Bin1       | 3.43  | 1.22E-07 |
| 1459021_at   | ---                                         | ---        | -3.43 | 2.08E-05 |
| 1444402_at   | zinc finger CCCH type containing 12C        | Zc3h12c    | -3.43 | 6.26E-08 |
| 1455739_at   | predicted gene 4980                         | Gm4980     | 3.42  | 3.49E-07 |
| 1416658_at   | frizzled-related protein                    | Frzb       | 3.42  | 4.46E-06 |
| 1442203_at   | hypothetical LOC552880                      | LOC552880  | 3.41  | 1.13E-06 |
| 1437190_at   | serine/threonine/tyrosine kinase 1          | Styk1      | 3.41  | 1.82E-08 |
| 1444542_at   | ---                                         | ---        | 3.41  | 2.07E-06 |
| 1456652_at   | denticleless homolog (Drosophila)           | Dtl        | -3.40 | 1.82E-06 |
| 1448363_at   | yes-associated protein 1                    | Yap1       | 3.40  | 1.78E-06 |
| 1444752_at   | RIKEN cDNA C230073G13 gene                  | C230073G13 | 3.39  | 1.63E-05 |
| 1421186_at   | chemokine (C-C motif) receptor 2            | Ccr2       | 3.39  | 5.39E-06 |
| 1416011_x_at | EH-domain containing 1                      | Ehd1       | 3.39  | 9.78E-09 |
| 1430388_a_at | sulfatase 2                                 | Sulf2      | 3.39  | 2.81E-07 |
| 1416645_a_at | alpha fetoprotein                           | Afp        | 3.38  | 8.66E-06 |
| 1424312_at   | adiponectin receptor 1                      | Adipor1    | -3.38 | 5.28E-09 |
| 1439912_at   | RIKEN cDNA 9430098F02 gene /// prot         | 9430098F02 | -3.38 | 3.22E-07 |
| 1437303_at   | interleukin 6 signal transducer             | Il6st      | -3.37 | 1.97E-06 |
| 1443777_at   | ---                                         | ---        | -3.37 | 1.09E-06 |
| 1428268_at   | pleckstrin and Sec7 domain containing 2     | Psd2       | 3.37  | 3.26E-06 |
| 1455034_at   | nuclear receptor subfamily 4, group A, m    | Nr4a2      | -3.37 | 7.75E-04 |

|              |                                                            |            |       |          |
|--------------|------------------------------------------------------------|------------|-------|----------|
| 1427169_at   | par-3 partitioning defective 3 homolog B                   | Pard3b     | 3.36  | 9.28E-04 |
| 1425494_s_at | bone morphogenetic protein receptor, type I                | Bmpr1a     | -3.36 | 3.96E-08 |
| 1449008_at   | tubby-like protein 3                                       | Tulp3      | -3.36 | 3.64E-11 |
| 1423002_at   | phosphoprotein associated with glycosphingolipid           | Pag1       | -3.36 | 5.18E-07 |
| 1446085_at   | ---                                                        | ---        | 3.36  | 1.75E-07 |
| 1421088_at   | glypican 4                                                 | Gpc4       | -3.36 | 4.46E-04 |
| 1441189_at   | ---                                                        | ---        | -3.36 | 1.33E-04 |
| 1418752_at   | aldehyde dehydrogenase family 3, subfamily 1               | Aldh3a1    | 3.35  | 3.34E-10 |
| 1447602_x_at | sulfatase 2                                                | Sulf2      | 3.35  | 3.48E-05 |
| 1457923_at   | ---                                                        | ---        | 3.35  | 9.97E-09 |
| 1420712_a_at | hepsin                                                     | Hpn        | 3.35  | 5.88E-09 |
| 1444467_at   | expressed sequence C77534                                  | C77534     | -3.35 | 3.82E-05 |
| 1446254_at   | ---                                                        | ---        | -3.35 | 1.99E-07 |
| 1444102_at   | ---                                                        | ---        | 3.34  | 6.37E-09 |
| 1450298_at   | tumor necrosis factor (ligand) superfamily 1, subfamily 14 | Tnfsf14    | -3.34 | 5.28E-10 |
| 1453571_at   | DEP domain containing 6                                    | Depdc6     | -3.32 | 2.03E-08 |
| 1451938_a_at | syntrophin, basic 1                                        | Sntb1      | 3.32  | 5.72E-06 |
| 1449590_a_at | muscle and microspikes RAS                                 | Mras       | 3.32  | 3.26E-06 |
| 1424229_at   | dual-specificity tyrosine-(Y)-phosphorylation              | Dyrk3      | -3.32 | 7.65E-08 |
| 1422645_at   | hemochromatosis                                            | Hfe        | 3.32  | 1.00E-03 |
| 1419061_at   | ras homolog gene family, member D                          | Rhod       | 3.32  | 2.84E-06 |
| 1443863_at   | fibronectin type III domain containing 3A                  | Fndc3a     | 3.32  | 9.91E-10 |
| 1450544_at   | coiled-coil domain containing 48                           | Ccdc48     | -3.31 | 6.62E-05 |
| 1442411_at   | ---                                                        | ---        | 3.31  | 4.88E-06 |
| 1438730_at   | neuron navigator 1                                         | Nav1       | -3.31 | 5.54E-04 |
| 1455157_a_at | family with sequence similarity 38, member 1               | Fam38a     | 3.30  | 8.22E-07 |
| 1435694_at   | Rho GTPase activating protein 26                           | Arhgap26   | 3.30  | 6.45E-08 |
| 1452473_at   | proline rich 15                                            | Prr15      | -3.29 | 6.63E-08 |
| 1454832_at   | phosphatase and actin regulator 1                          | Phactr1    | -3.29 | 1.53E-07 |
| 1439634_at   | TBC1 domain family, member 30                              | Tbc1d30    | -3.28 | 3.96E-06 |
| 1444396_at   | Transformation related protein 53 inducible 2              | Trp53inp2  | -3.28 | 9.55E-06 |
| 1437176_at   | NLR family, CARD domain containing 5                       | Nlrc5      | -3.28 | 3.93E-07 |
| 1457117_at   | nuclear factor, erythroid derived 2, like 2                | Nfe2l2     | -3.28 | 2.14E-11 |
| 1428104_at   | TPX2, microtubule-associated protein homolog               | Tpx2       | -3.28 | 8.62E-08 |
| 1448689_at   | related RAS viral (r-ras) oncogene homolog                 | Rras2      | -3.28 | 9.56E-06 |
| 1454713_s_at | histidine decarboxylase                                    | Hdc        | -3.27 | 2.80E-07 |
| 1436897_at   | malignant fibrous histiocytoma amplified                   | Mfhas1     | -3.27 | 4.16E-07 |
| 1451474_a_at | poly (ADP-ribose) polymerase family, member 8              | Parp8      | 3.27  | 3.58E-08 |
| 1432958_at   | RIKEN cDNA 5730407O05 gene                                 | 5730407O05 | 3.26  | 3.06E-06 |
| 1441698_at   | ---                                                        | ---        | -3.26 | 6.30E-05 |
| 1421992_a_at | insulin-like growth factor binding protein 4               | Igfbp4     | 3.26  | 5.52E-05 |
| 1437618_x_at | G protein-coupled receptor 85                              | Gpr85      | 3.26  | 1.05E-07 |
| 1417523_at   | pleckstrin                                                 | Plek       | -3.26 | 2.92E-10 |
| 1421578_at   | chemokine (C-C motif) ligand 4                             | Ccl4       | -3.26 | 2.99E-06 |
| 1419249_at   | cyclin-dependent kinase 14                                 | Cdk14      | -3.26 | 1.67E-07 |
| 1459978_x_at | cyclin J-like                                              | Ccnj1      | -3.26 | 1.82E-06 |
| 1433486_at   | chloride channel 3                                         | Clcn3      | 3.25  | 4.81E-08 |

|              |                                           |              |       |          |
|--------------|-------------------------------------------|--------------|-------|----------|
| 1460744_at   | ---                                       | ---          | -3.25 | 4.61E-04 |
| 1427141_at   | NDC80 homolog, kinetochore complex c      | 2700099C1    | -3.25 | 2.60E-07 |
| 1451790_a_at | tissue factor pathway inhibitor           | Tfpi         | 3.25  | 4.08E-05 |
| 1428702_at   | DEAD (Asp-Glu-Ala-Asp) box polypepti      | Ddx28        | -3.25 | 5.19E-08 |
| 1451475_at   | plexin D1                                 | Plxnd1       | 3.24  | 2.67E-08 |
| 1454463_at   | RIKEN cDNA 5430402O13 gene                | 5430402O1    | 3.24  | 4.17E-05 |
| 1439909_at   | zinc finger protein 521                   | Zfp521       | -3.24 | 6.69E-10 |
| 1433893_s_at | sperm associated antigen 5                | Spag5        | -3.24 | 7.69E-08 |
| 1443167_at   | ---                                       | ---          | -3.24 | 1.48E-06 |
| 1434575_at   | erythrocyte protein band 4.1-like 1       | Epb4.111     | 3.24  | 2.92E-06 |
| 1443263_at   | ---                                       | ---          | -3.23 | 9.08E-08 |
| 1442898_at   | ---                                       | ---          | 3.22  | 1.65E-03 |
| 1423753_at   | BMP and activin membrane-bound inhib      | Bambi        | -3.22 | 1.77E-06 |
| 1448954_at   | nuclear receptor interacting protein 3    | Nrip3        | -3.22 | 1.07E-12 |
| 1437892_at   | zinc finger with KRAB and SCAN doma       | Zkscan3      | 3.22  | 1.18E-09 |
| 1460368_at   | membrane protein, palmitoylated 4 (MA     | Mpp4         | -3.22 | 2.79E-05 |
| 1420889_at   | holocytochrome c synthetase               | Hccs         | -3.22 | 1.61E-06 |
| 1437658_a_at | small nucleolar RNA host gene (non-pro    | Snhg1        | -3.21 | 7.64E-08 |
| 1438296_at   | predicted gene 14462                      | Gm14462      | 3.21  | 1.74E-05 |
| 1446950_at   | ---                                       | ---          | -3.21 | 5.58E-08 |
| 1443838_x_at | fatty acid desaturase 2                   | Fads2        | -3.21 | 3.30E-09 |
| 1448060_at   | sema domain, transmembrane domain (T      | Sema6d       | 3.21  | 1.20E-03 |
| 1425493_at   | bone morphogenetic protein receptor, typ  | Bmpr1a       | -3.21 | 3.60E-07 |
| 1440440_at   | ---                                       | ---          | 3.20  | 3.15E-05 |
| 1451674_at   | solute carrier family 12, member 5        | Slc12a5      | 3.20  | 1.23E-05 |
| 1449913_at   | zinc finger protein 2                     | Zfp2         | 3.20  | 1.52E-04 |
| 1425491_at   | bone morphogenetic protein receptor, typ  | Bmpr1a       | -3.20 | 5.15E-07 |
| 1424133_at   | transmembrane protein 98                  | Tmem98       | 3.20  | 9.44E-08 |
| 1451246_s_at | aurora kinase B                           | Aurkb        | -3.20 | 1.24E-08 |
| 1450512_at   | netrin 4                                  | Ntn4         | -3.19 | 6.66E-04 |
| 1433719_at   | solute carrier family 9 (sodium/hydrogen  | Slc9a9       | 3.19  | 1.84E-06 |
| 1437249_at   | src family associated phosphoprotein 1    | Skap1        | 3.19  | 2.86E-04 |
| 1456261_at   | SH3-domain kinase binding protein 1       | Sh3kbp1      | -3.18 | 9.61E-08 |
| 1445687_at   | predicted gene 885                        | Gm885        | 3.18  | 2.11E-06 |
| 1458365_at   | golgin, RAB6-interacting                  | Gorab        | -3.18 | 4.30E-06 |
| 1435383_x_at | necdin                                    | Ndn          | 3.17  | 5.20E-07 |
| 1423668_at   | zinc finger, DHHC domain containing 14    | Zdhhc14      | -3.17 | 6.74E-05 |
| 1425760_a_at | phosphatidylinositol transfer protein, me | Pitpnm1      | 3.17  | 2.78E-07 |
| 1415810_at   | ubiquitin-like, containing PHD and RIN    | Uhrf1        | -3.17 | 2.88E-05 |
| 1420772_a_at | TSC22 domain family, member 3             | Tsc22d3      | -3.16 | 2.00E-07 |
| 1440109_at   | DNA segment, Chr 7, ERATO Doi 413,        | D7Ert413e    | -3.16 | 1.49E-03 |
| 1436512_at   | ADP-ribosylation factor-like 4C /// simi  | Arl4c /// LO | 3.16  | 2.53E-07 |
| 1439736_at   | RIKEN cDNA 5830453J16 gene                | 5830453J16   | -3.16 | 1.50E-06 |
| 1431623_at   | RIKEN cDNA 1700023H06 gene                | 1700023H0    | -3.15 | 1.75E-04 |
| 1460560_at   | BAH domain and coiled-coil containing     | Bahcc1       | -3.15 | 9.75E-07 |
| 1454163_at   | RIKEN cDNA 5730420D15 gene                | 5730420D1    | 3.15  | 4.44E-06 |
| 1429671_at   | SCAN domain containing 3                  | Scand3       | 3.14  | 2.27E-07 |

|              |                                             |              |       |          |
|--------------|---------------------------------------------|--------------|-------|----------|
| 1436216_s_at | inverted formin, FH2 and WH2 domain c       | Inf2         | 3.14  | 1.43E-06 |
| 1457772_at   | ---                                         | ---          | 3.14  | 1.04E-05 |
| 1442643_at   | KDM1 lysine (K)-specific demethylase 6      | Kdm6b        | -3.14 | 2.19E-05 |
| 1416835_s_at | S-adenosylmethionine decarboxylase 1        | Amd1         | -3.14 | 1.40E-06 |
| 1442000_at   | major facilitator superfamily domain con    | Mfsd2b       | -3.14 | 1.83E-04 |
| 1445629_at   | Solute carrier family 35 (UDP-glucuronid    | Slc35d1      | 3.14  | 1.04E-09 |
| 1456328_at   | B-cell scaffold protein with ankyrin repe   | Bank1        | -3.13 | 1.43E-08 |
| 1456446_at   | RIKEN cDNA 4930523C07 gene                  | 4930523C07   | 3.13  | 1.74E-08 |
| 1436907_at   | neuron navigator 1                          | Nav1         | -3.12 | 8.52E-08 |
| 1433678_at   | phospholipase D family, member 4            | Pld4         | -3.12 | 1.41E-03 |
| 1454959_s_at | guanine nucleotide binding protein (G pr    | Gnai1        | -3.12 | 2.35E-04 |
| 1459128_at   | ---                                         | ---          | -3.12 | 2.94E-05 |
| 1439153_at   | ring finger protein 144B                    | Rnf144b      | -3.12 | 1.83E-04 |
| 1444974_at   | expressed sequence AU023617                 | AU023617     | -3.12 | 2.27E-05 |
| 1430819_at   | N-acylethanolamine acid amidase             | Naaa         | -3.12 | 1.48E-10 |
| 1425315_at   | dedicator of cytokinesis 7                  | Dock7        | 3.11  | 1.41E-07 |
| 1456636_at   | RIKEN cDNA 4930414L22 gene                  | 4930414L22   | -3.11 | 3.43E-04 |
| 1432602_at   | ---                                         | ---          | -3.11 | 1.75E-08 |
| 1439938_at   | serine/threonine kinase 38                  | Stk38        | 3.11  | 3.30E-05 |
| 1452283_at   | Ras association (RalGDS/AF-6) domain        | Rassf8       | -3.11 | 6.48E-06 |
| 1427424_at   | UDP-N-acetyl-alpha-D-galactosamine:po       | Galnt6 /// L | 3.10  | 1.52E-07 |
| 1435845_at   | ---                                         | ---          | -3.10 | 1.82E-06 |
| 1418490_at   | serine dehydratase-like                     | Sdsl         | -3.09 | 4.38E-07 |
| 1430704_at   | interleukin-1 receptor-associated kinase 3  | Irak3        | 3.09  | 1.52E-07 |
| 1448175_at   | EH-domain containing 1                      | Ehd1         | 3.09  | 1.90E-08 |
| 1442941_at   | expressed sequence C77027                   | C77027       | -3.09 | 2.43E-04 |
| 1417471_s_at | DNA segment, Chr 1, ERATO Doi 622,          | D1Ert622e    | 3.09  | 1.62E-08 |
| 1425551_at   | huntingtin interacting protein 1 related    | Hip1r        | 3.09  | 1.06E-04 |
| 1416401_at   | CD82 antigen                                | Cd82         | 3.09  | 6.11E-09 |
| 1446355_at   | RIKEN cDNA 9530085L11 gene                  | 9530085L11   | -3.08 | 1.27E-06 |
| 1438805_at   | cyclin D3                                   | Ccnd3        | -3.08 | 2.29E-08 |
| 1435336_at   | cadherin, EGF LAG seven-pass G-type r       | Celsr2       | -3.07 | 8.68E-04 |
| 1436584_at   | sprouty homolog 2 (Drosophila)              | Spry2        | -3.07 | 4.02E-09 |
| 1417784_at   | amyotrophic lateral sclerosis 2 (juvenile)  | Als2         | -3.07 | 4.30E-06 |
| 1438042_at   | short stature homeobox 2                    | Shox2        | 3.07  | 3.15E-04 |
| 1428804_at   | microfibrillar-associated protein 3-like    | Mfap3l1      | 3.07  | 3.63E-06 |
| 1439470_at   | ---                                         | ---          | -3.06 | 3.44E-09 |
| 1448380_at   | lectin, galactoside-binding, soluble, 3 bin | Lgals3bp     | 3.06  | 3.00E-08 |
| 1438833_at   | cancer susceptibility candidate 5           | Casc5        | -3.06 | 1.07E-04 |
| 1451691_at   | endothelin receptor type A                  | Ednra        | -3.06 | 6.12E-05 |
| 1431100_at   | Ras and Rab interactor-like                 | Rinl         | 3.05  | 2.12E-11 |
| 1425492_at   | bone morphogenetic protein receptor, typ    | Bmpr1a       | -3.05 | 1.62E-08 |
| 1450522_a_at | H1 histone family, member 0                 | H1f0         | -3.05 | 6.89E-11 |
| 1449567_at   | transketolase-like 1                        | Tktl1        | 3.05  | 1.56E-07 |
| 1434774_at   | rhomoid 5 homolog 2 (Drosophila)            | Rhbdf2       | 3.05  | 9.33E-07 |
| 1445191_at   | exonuclease 3'-5' domain containing 1       | Exd1         | 3.05  | 3.69E-04 |
| 1442239_at   | ---                                         | ---          | -3.04 | 7.64E-07 |

|              |                                                   |            |       |          |
|--------------|---------------------------------------------------|------------|-------|----------|
| 1421600_a_at | tripartite motif-containing 26                    | Trim26     | 3.04  | 2.30E-06 |
| 1441164_at   | ---                                               | ---        | 3.03  | 4.82E-06 |
| 1456674_at   | RAD54 homolog B ( <i>S. cerevisiae</i> )          | Rad54b     | -3.03 | 1.63E-03 |
| 1425586_a_at | melanophilin                                      | Mlph       | -3.03 | 9.20E-07 |
| 1446519_at   | RIKEN cDNA A730091E23 gene                        | A730091E2  | 3.03  | 1.02E-03 |
| 1437181_at   | pellino 2                                         | Peli2      | -3.03 | 3.02E-08 |
| 1445984_at   | ---                                               | ---        | -3.02 | 1.46E-07 |
| 1416271_at   | PERP, TP53 apoptosis effector                     | Perp       | -3.02 | 1.60E-04 |
| 1444353_at   | RIKEN cDNA C030040A22 gene                        | C030040A2  | 3.02  | 1.70E-06 |
| 1438800_at   | N-acetylglucosamine kinase                        | Nagk       | 3.02  | 1.14E-05 |
| 1441986_at   | zinc finger, CCHC domain containing 6             | Zcchc6     | -3.02 | 1.11E-05 |
| 1457214_at   | ---                                               | ---        | 3.01  | 1.03E-06 |
| 1448694_at   | Jun oncogene                                      | Jun        | -3.01 | 1.09E-05 |
| 1451959_a_at | vascular endothelial growth factor A              | Vegfa      | -3.01 | 7.98E-07 |
| 1430197_a_at | phosphatidylinositol transfer protein, me         | Pitpnm2    | -3.00 | 8.89E-07 |
| 1418133_at   | B-cell leukemia/lymphoma 3                        | Bcl3       | 3.00  | 3.05E-06 |
| 1437853_x_at | necdin                                            | Ndn        | 3.00  | 7.65E-04 |
| 1457691_at   | G protein-coupled receptor 183                    | Gpr183     | 3.00  | 8.00E-08 |
| 1458915_at   | expressed sequence C77949                         | C77949     | 3.00  | 3.80E-06 |
| 1424941_at   | cDNA sequence, BC016579                           | BC016579   | -2.99 | 1.46E-08 |
| 1431777_a_at | high mobility group nucleosomal binding           | Hmgn3      | 2.99  | 9.15E-09 |
| 1439873_at   | diacylglycerol kinase, delta                      | Dgkd       | -2.99 | 1.35E-08 |
| 1460694_s_at | supervillin                                       | Svil       | -2.99 | 2.03E-09 |
| 1427615_at   | integrin alpha 4                                  | Itga4      | 2.98  | 2.84E-06 |
| 1440922_at   | RIKEN cDNA 9130208D14 gene                        | 9130208D1  | 2.98  | 4.61E-07 |
| 1428665_at   | profilin family, member 4                         | Pfn4       | -2.98 | 5.16E-06 |
| 1438139_at   | Rho GTPase activating protein 28                  | Arhgap28   | -2.98 | 2.38E-04 |
| 1451486_at   | solute carrier family 46, member 3                | Slc46a3    | 2.98  | 5.38E-08 |
| 1441045_at   | DEAD (Asp-Glu-Ala-Asp) box polypepti              | Ddx43      | -2.97 | 3.79E-06 |
| 1448721_at   | DNA segment, Chr 1, ERATO Doi 622,                | D1Ertd622e | 2.97  | 7.44E-08 |
| 1423311_s_at | trophoblast glycoprotein                          | Tpbg       | 2.97  | 1.67E-03 |
| 1433448_at   | solute carrier family 25, member 44               | Slc25a44   | -2.97 | 1.56E-08 |
| 1432543_a_at | Kruppel-like factor 13                            | Klf13      | -2.96 | 7.47E-08 |
| 1427541_x_at | hyaluronan mediated motility receptor (R          | Hmmr       | -2.96 | 2.16E-05 |
| 1416664_at   | cell division cycle 20 homolog ( <i>S. cerevi</i> | Cdc20      | -2.96 | 2.23E-04 |
| 1445612_at   | ---                                               | ---        | -2.96 | 1.15E-07 |
| 1456593_at   | ---                                               | ---        | 2.95  | 1.57E-05 |
| 1449152_at   | cyclin-dependent kinase inhibitor 2B (p1          | Cdkn2b     | 2.94  | 5.14E-08 |
| 1457139_at   | Autism susceptibility candidate 2                 | Auts2      | -2.94 | 1.19E-08 |
| 1423635_at   | bone morphogenetic protein 2                      | Bmp2       | -2.94 | 4.27E-06 |
| 1418021_at   | complement component 4B (Childo bloo              | C4b        | 2.94  | 2.39E-06 |
| 1448664_a_at | SPEG complex locus                                | Speg       | 2.94  | 8.02E-07 |
| 1424354_at   | transmembrane protein 140                         | Tmem140    | 2.94  | 1.89E-08 |
| 1416474_at   | immunoglobulin superfamily, DCC subcl             | Igdcc4     | 2.93  | 3.18E-08 |
| 1427985_at   | spindlin family, member 4                         | Spin4      | 2.93  | 8.16E-06 |
| 1460735_at   | supervillin                                       | Svil       | -2.93 | 5.01E-09 |
| 1447273_x_at | ATPase, class V, type 10A                         | Atp10a     | 2.93  | 3.62E-04 |

|              |                                                              |            |       |          |
|--------------|--------------------------------------------------------------|------------|-------|----------|
| 1440992_at   | RIKEN cDNA 3110052M02 gene                                   | 3110052M02 | 2.93  | 1.32E-07 |
| 1418981_at   | caspase 12                                                   | Casp12     | -2.92 | 7.72E-04 |
| 1440739_at   | vascular endothelial growth factor C                         | Vegfc      | 2.92  | 3.25E-09 |
| 1438204_at   | Histone cluster 1, H1c                                       | Hist1h1c   | -2.92 | 1.20E-05 |
| 1423520_at   | lamin B1                                                     | Lmnb1      | -2.92 | 2.90E-09 |
| 1449642_at   | ---                                                          | ---        | 2.92  | 5.78E-06 |
| 1436211_at   | THO complex 4                                                | Thoc4      | -2.92 | 1.98E-06 |
| 1444482_at   | RIKEN cDNA A130078K24 gene                                   | A130078K24 | 2.92  | 8.60E-08 |
| 1434573_at   | TRAF3 interacting protein 3                                  | Traf3ip3   | 2.92  | 3.40E-08 |
| 1438307_at   | high mobility group box 2                                    | Hmgb2      | -2.92 | 6.25E-05 |
| 1424268_at   | spermine oxidase                                             | Smox       | -2.92 | 9.63E-09 |
| 1460319_at   | fucosyltransferase 8                                         | Fut8       | -2.91 | 2.70E-09 |
| 1454694_a_at | topoisomerase (DNA) II alpha                                 | Top2a      | -2.91 | 2.39E-08 |
| 1444169_at   | RIKEN cDNA 3110052M02 gene                                   | 3110052M02 | 2.91  | 8.32E-08 |
| 1430955_at   | RIKEN cDNA 2810403A07 gene                                   | 2810403A07 | -2.91 | 6.32E-05 |
| 1441115_at   | DNA segment, Chr 18, ERATO Doi 232                           | D18Ert232  | -2.91 | 3.06E-08 |
| 1418826_at   | membrane-spanning 4-domains, subfamily 4A                    | Ms4a6b     | 2.91  | 2.35E-04 |
| 1435393_at   | melanocortin 1 receptor                                      | Mcl1r      | -2.90 | 1.44E-04 |
| 1445001_at   | ---                                                          | ---        | -2.90 | 1.32E-05 |
| 1421594_a_at | synaptotagmin-like 2                                         | Syt12      | 2.90  | 2.03E-08 |
| 1451612_at   | metallothionein 1                                            | Mt1        | -2.90 | 3.38E-05 |
| 1434592_at   | solute carrier family 16 (monocarboxylic anion transporters) | Slc16a10   | -2.90 | 1.07E-05 |
| 1451525_at   | Rho GTPase activating protein 12                             | Arhgap12   | 2.89  | 2.29E-04 |
| 1438061_at   | RIKEN cDNA 4930523C07 gene                                   | 4930523C07 | 2.89  | 1.64E-06 |
| 1416674_at   | protein tyrosine phosphatase, receptor type 11               | Ptpru      | -2.89 | 1.47E-06 |
| 1457851_at   | ---                                                          | ---        | -2.88 | 6.20E-05 |
| 1436827_at   | family with sequence similarity 59, member 1                 | Fam59a     | -2.88 | 6.72E-04 |
| 1437477_at   | leucine rich repeat (in FLII) interacting protein 1          | Lrrfip1    | 2.88  | 1.64E-10 |
| 1444673_at   | RIKEN cDNA E030031F02 gene                                   | E030031F02 | -2.87 | 1.87E-06 |
| 1449109_at   | suppressor of cytokine signaling 2                           | Socs2      | 2.87  | 7.83E-10 |
| 1418815_at   | cadherin 2                                                   | Cdh2       | -2.87 | 1.15E-08 |
| 1441864_x_at | centromere protein A                                         | Cenpa      | -2.87 | 1.75E-04 |
| 1418045_at   | inositol polyphosphate-1-phosphatase                         | Inpp1      | 2.87  | 2.52E-10 |
| 1452703_at   | S-adenosylhomocysteine hydrolase-like 2                      | Ahcy12     | -2.87 | 3.47E-08 |
| 1440850_at   | ring finger protein, LIM domain interacting 1                | Rlim       | -2.87 | 3.34E-07 |
| 1418251_at   | tubby-like protein 3                                         | Tulp3      | -2.86 | 9.35E-07 |
| 1457806_at   | Family with sequence similarity 196, member 1                | Fam196a    | -2.86 | 1.66E-06 |
| 1418281_at   | RAD51 homolog ( <i>S. cerevisiae</i> )                       | Rad51      | -2.86 | 7.40E-04 |
| 1447005_at   | ---                                                          | ---        | -2.86 | 8.03E-07 |
| 1423725_at   | plastin 3 (T-isoform)                                        | Pls3       | -2.86 | 7.45E-07 |
| 1441217_at   | ---                                                          | ---        | 2.86  | 2.94E-06 |
| 1445447_at   | ---                                                          | ---        | 2.86  | 4.28E-04 |
| 1449629_s_at | ---                                                          | ---        | -2.86 | 3.87E-07 |
| 1441657_at   | ---                                                          | ---        | -2.85 | 3.26E-07 |
| 1423714_at   | ASF1 anti-silencing function 1 homolog                       | Asf1b      | -2.85 | 7.74E-07 |
| 1433699_at   | tumor necrosis factor, alpha-induced protein 3               | Tnfaip3    | -2.85 | 4.80E-07 |
| 1437605_at   | nephrosis 2 homolog, podocin (human)                         | Nphs2      | -2.85 | 1.25E-04 |



|              |                                                                                 |                        |       |          |
|--------------|---------------------------------------------------------------------------------|------------------------|-------|----------|
| 1424542_at   | S100 calcium binding protein A4                                                 | S100a4                 | 2.85  | 2.45E-05 |
| 1428074_at   | transmembrane protein 158                                                       | Tmem158                | -2.85 | 3.76E-10 |
| 1434423_at   | GULP, engulfment adaptor PTB domain                                             | Gulp1                  | -2.85 | 1.13E-06 |
| 1456341_a_at | Kruppel-like factor 9                                                           | Klf9                   | -2.85 | 8.77E-07 |
| 1418099_at   | tumor necrosis factor receptor superfamily class 1 member 1b                    | Tnfrsf1b               | 2.85  | 1.11E-07 |
| 1416010_a_at | EH-domain containing 1                                                          | Ehd1                   | 2.85  | 9.45E-09 |
| 1444252_at   | Predicted gene 15506                                                            | Gm15506                | 2.85  | 3.43E-05 |
| 1457578_at   | peroxisome proliferative activated receptor gamma                               | Ppargc1b               | -2.84 | 1.11E-04 |
| 1448487_at   | leucine rich repeat (in FLII) interacting protein 1                             | Lrrfip1                | 2.84  | 6.51E-11 |
| 1436636_at   | ---                                                                             | ---                    | 2.84  | 2.79E-08 |
| 1446610_at   | engulfment and cell motility 1, ced-12 homolog                                  | Elmo1                  | -2.84 | 8.68E-08 |
| 1441083_at   | cleft lip and palate associated transmembrane protein 1                         | Clptm1                 | -2.84 | 1.89E-05 |
| 1457974_at   | ---                                                                             | ---                    | -2.84 | 8.08E-04 |
| 1451832_at   | chemokine-like factor                                                           | Cklf                   | 2.84  | 6.94E-05 |
| 1447962_at   | ---                                                                             | ---                    | 2.83  | 6.54E-08 |
| 1417777_at   | prostaglandin reductase 1                                                       | Ptgr1                  | 2.83  | 1.20E-07 |
| 1451659_at   | FYVE, RhoGEF and PH domain containing protein 4                                 | Fgd4                   | 2.83  | 2.18E-08 |
| 1419406_a_at | B-cell CLL/lymphoma 11A (zinc finger protein) 1a                                | Bcl11a                 | 2.83  | 8.50E-09 |
| 1435046_at   | ---                                                                             | ---                    | 2.83  | 2.00E-06 |
| 1419692_a_at | leukotriene C4 synthase                                                         | Ltc4s                  | 2.83  | 8.18E-10 |
| 1449602_at   | ---                                                                             | ---                    | 2.82  | 2.38E-07 |
| 1440663_at   | ---                                                                             | ---                    | -2.82 | 2.06E-06 |
| 1458524_at   | fibronectin type III domain containing 3A                                       | Fndc3a                 | 2.82  | 2.33E-07 |
| 1435402_at   | GRAM domain containing 1B                                                       | Gramd1b                | 2.82  | 2.24E-08 |
| 1448892_at   | dedicator of cytokinesis 7                                                      | Dock7                  | 2.82  | 2.57E-06 |
| 1430149_at   | NADH dehydrogenase (ubiquinone) 1 alpha subunit                                 | Ndufa3                 | -2.82 | 2.21E-09 |
| 1448752_at   | carbonic anhydrase 2                                                            | Car2                   | -2.82 | 2.53E-06 |
| 1445274_at   | zinc finger protein 781                                                         | Zfp781                 | 2.82  | 1.18E-05 |
| 1439660_at   | human immunodeficiency virus type I enhancer of polycomb homolog 1 (Drosophila) | Hivep3 /// LOC10045106 | 2.82  | 1.36E-06 |
| 1429914_at   | enhancer of polycomb homolog 1 (Drosophila)                                     | Epc1                   | -2.82 | 4.57E-09 |
| 1442880_at   | ---                                                                             | ---                    | 2.82  | 1.66E-08 |
| 1448297_a_at | tyrosine kinase, non-receptor, 2                                                | Tnk2                   | -2.82 | 4.39E-07 |
| 1430798_x_at | mitochondrial ribosomal protein L15                                             | Mrpl15                 | -2.81 | 1.25E-05 |
| 1439281_at   | solute carrier family 26, member 8                                              | Slc26a8                | -2.81 | 1.28E-04 |
| 1419118_at   | hypothetical protein LOC100045106 /// V                                         | LOC100045106           | 2.80  | 6.24E-05 |
| 1428058_at   | AHNAK nucleoprotein (desmoyokin)                                                | Ahnak                  | 2.80  | 1.70E-05 |
| 1430744_at   | napsin A aspartic peptidase                                                     | Napsa                  | 2.80  | 1.33E-06 |
| 1436195_at   | cDNA sequence BC046404                                                          | BC046404               | -2.80 | 6.46E-06 |
| 1458653_at   | ---                                                                             | ---                    | -2.80 | 1.05E-04 |
| 1457125_at   | ---                                                                             | ---                    | -2.79 | 2.46E-05 |
| 1446303_at   | insulin-like growth factor I receptor                                           | Igf1r                  | -2.79 | 2.93E-06 |
| 1453103_at   | actin-binding LIM protein 1                                                     | Ablim1                 | 2.79  | 1.57E-06 |
| 1456400_at   | telomeric repeat binding factor 2, interacting protein 1                        | Terf2ip                | -2.79 | 1.44E-06 |
| 1440534_at   | predicted gene 10001                                                            | Gm10001                | -2.78 | 3.17E-08 |
| 1433037_at   | RIKEN cDNA 5830434F19 gene                                                      | 5830434F19             | 2.78  | 1.05E-06 |
| 1420271_at   | ---                                                                             | ---                    | -2.78 | 1.59E-04 |
| 1441120_at   | ---                                                                             | ---                    | 2.78  | 8.53E-07 |

|              |                                                    |            |       |          |
|--------------|----------------------------------------------------|------------|-------|----------|
| 1437918_at   | RIKEN cDNA 4930539E08 gene                         | 4930539E08 | 2.78  | 9.87E-07 |
| 1447136_at   | ---                                                | ---        | -2.78 | 8.76E-04 |
| 1429959_at   | ---                                                | ---        | 2.78  | 1.57E-07 |
| 1450237_at   | deoxyribonuclease II beta                          | Dnase2b    | -2.78 | 1.15E-03 |
| 1428289_at   | Kruppel-like factor 9                              | Klf9       | -2.78 | 2.27E-08 |
| 1435807_at   | cell division cycle 42 homolog (S. cerevisiae)     | Cdc42      | -2.78 | 1.55E-06 |
| 1423026_at   | RAD51 homolog c (S. cerevisiae)                    | Rad51c     | -2.78 | 6.59E-04 |
| 1450627_at   | progressive ankylosis                              | Ank        | -2.77 | 3.07E-11 |
| 1439527_at   | progesterone receptor                              | Pgr        | -2.77 | 1.02E-09 |
| 1422885_at   | small nuclear ribonucleoprotein D3                 | Snrpd3     | -2.77 | 1.57E-08 |
| 1444233_at   | G protein-coupled receptor 132                     | Gpr132     | 2.77  | 8.90E-06 |
| 1417331_a_at | ADP-ribosylation factor-like 6                     | Arl6       | 2.77  | 1.77E-06 |
| 1425855_a_at | v-crk sarcoma virus CT10 oncogene homolog          | Crk        | -2.76 | 1.74E-08 |
| 1447811_s_at | adhesion molecule with Ig like domain 1            | Amigo1     | -2.76 | 5.77E-05 |
| 1437916_at   | ---                                                | ---        | -2.76 | 1.09E-09 |
| 1439819_at   | expressed sequence AU015263                        | AU015263   | -2.76 | 2.79E-06 |
| 1419494_a_at | tumor protein D52                                  | Tpd52      | 2.76  | 2.29E-05 |
| 1454703_x_at | small nucleolar RNA host gene (non-protein coding) | Snhg1      | -2.76 | 2.47E-07 |
| 1448005_at   | SAM and SH3 domain containing 1                    | Sash1      | -2.76 | 2.03E-04 |
| 1436882_at   | ubiquitin-like 5                                   | Ubl5       | -2.76 | 1.74E-08 |
| 1434875_a_at | high mobility group nucleosomal binding domain 3   | Hmgn3      | 2.76  | 6.81E-08 |
| 1440882_at   | low density lipoprotein receptor-related protein 8 | Lrp8       | -2.75 | 9.68E-08 |
| 1420557_at   | Eph receptor A5                                    | Epha5      | 2.75  | 3.80E-06 |
| 1435293_at   | a disintegrin and metallopeptidase domain 22       | Adam22     | -2.75 | 4.42E-06 |
| 1449997_at   | tropomyosin 3, gamma                               | Tpm3       | -2.75 | 3.93E-06 |
| 1458039_at   | ---                                                | ---        | 2.75  | 2.09E-09 |
| 1417617_at   | ST6 (alpha-N-acetyl-neuraminyl-2,3-bisecting)      | St6galnac2 | -2.75 | 5.85E-10 |
| 1456209_x_at | ---                                                | ---        | -2.75 | 1.60E-10 |
| 1441748_at   | ---                                                | ---        | -2.75 | 2.74E-04 |
| 1431301_at   | proline rich 15                                    | Prr15      | -2.75 | 1.05E-04 |
| 1444069_at   | ---                                                | ---        | -2.75 | 7.35E-05 |
| 1459012_at   | RIKEN cDNA A730041O05 gene                         | A730041O05 | 2.75  | 9.98E-06 |
| 1430193_at   | cancer susceptibility candidate 5                  | Casc5      | -2.75 | 2.55E-05 |
| 1437070_at   | CDC14 cell division cycle 14 homolog B             | Cdc14b     | 2.74  | 3.10E-09 |
| 1424128_x_at | aurora kinase B                                    | Aurkb      | -2.74 | 3.17E-04 |
| 1419417_at   | vascular endothelial growth factor C               | Vegfc      | 2.74  | 8.76E-10 |
| 1440157_at   | ---                                                | ---        | -2.74 | 1.10E-05 |
| 1451926_at   | MAS-related GPR, member A4                         | Mrgpra4    | -2.74 | 3.57E-07 |
| 1418611_at   | G protein-coupled receptor 162                     | Gpr162     | 2.73  | 1.03E-04 |
| 1431197_at   | atlastin GTPase 2                                  | Atl2       | -2.73 | 1.42E-07 |
| 1424683_at   | family with sequence similarity 134, member 1      | Fam134b    | 2.73  | 1.44E-09 |
| 1431597_a_at | nuclear receptor interacting protein 3             | Nrip3      | -2.73 | 1.69E-08 |
| 1431641_at   | RIKEN cDNA 9330161L09 gene                         | 9330161L09 | -2.73 | 1.64E-03 |
| 1425338_at   | phospholipase C, beta 4                            | Plcb4      | 2.73  | 5.18E-04 |
| 1447272_s_at | ATPase, class V, type 10A                          | Atp10a     | 2.73  | 2.77E-08 |
| 1419978_s_at | DNA segment, Chr 10, ERATO Doi 610                 | D10Erd610  | 2.73  | 4.38E-05 |
| 1426472_at   | zinc finger protein 52                             | Zfp52      | 2.72  | 5.14E-09 |

|              |                                                  |            |       |          |
|--------------|--------------------------------------------------|------------|-------|----------|
| 1438808_at   | transformation related protein 53                | Trp53      | 2.72  | 1.50E-06 |
| 1435394_s_at | ras homolog gene family, member C                | Rhoc       | 2.72  | 6.48E-07 |
| 1455953_x_at | phosphoserine-tRNA kinase                        | Pstk       | 2.72  | 2.02E-04 |
| 1424107_at   | kinesin family member 18A                        | Kif18a     | -2.72 | 4.26E-08 |
| 1440226_at   | zinc finger protein 760                          | Zfp760     | 2.72  | 1.18E-08 |
| 1438724_at   | oxysterol binding protein-like 3                 | Osbpl3     | 2.71  | 9.15E-09 |
| 1418152_at   | high-mobility group nucleosome binding           | Hmgn5      | -2.71 | 1.17E-08 |
| 1459934_at   | ubiquitin specific peptidase 42                  | Usp42      | -2.71 | 1.68E-04 |
| 1417149_at   | procollagen-proline, 2-oxoglutarate 4-dio        | P4ha2      | 2.71  | 4.04E-07 |
| 1418072_at   | histone cluster 1, H2bc                          | Hist1h2bc  | 2.71  | 1.40E-09 |
| 1444420_at   | RIKEN cDNA E230032D23 gene                       | E230032D23 | 2.71  | 8.80E-04 |
| 1431167_at   | diacylglycerol kinase, gamma                     | Dgkg       | 2.71  | 1.40E-03 |
| 1457692_at   | ---                                              | ---        | 2.71  | 1.96E-06 |
| 1441727_s_at | zinc finger protein 467                          | Zfp467     | 2.71  | 7.96E-09 |
| 1447494_at   | DNA segment, Chr 7, Brigham & Women's            | D7Bwg082c  | -2.70 | 5.84E-06 |
| 1436258_at   | CDC42 guanine nucleotide exchange factor         | Arhgef9    | 2.70  | 7.28E-07 |
| 1454744_at   | RIKEN cDNA F630043A04 gene                       | F630043A04 | -2.70 | 7.46E-05 |
| 1435692_at   | potassium channel tetramerisation domain         | Kctd21     | 2.70  | 9.64E-07 |
| 1430108_at   | RIKEN cDNA 9030622M22 gene                       | 9030622M22 | 2.70  | 1.48E-04 |
| 1422430_at   | fidetin-like 1                                   | Figl1      | -2.70 | 7.67E-05 |
| 1419564_at   | zinc finger protein 467                          | Zfp467     | 2.70  | 3.84E-09 |
| 1450628_at   | solute carrier family 2, (facilitated glucose    | Slc2a8     | -2.70 | 2.29E-05 |
| 1441216_at   | ST3 beta-galactoside alpha-2,3-sialyltransferase | St3gal1    | -2.70 | 2.75E-08 |
| 1436909_at   | solute carrier family 25, member 44              | Slc25a44   | -2.70 | 7.08E-08 |
| 1423525_at   | microtubule associated serine/threonine kinase   | Mastl      | -2.69 | 3.40E-04 |
| 1454447_at   | RIKEN cDNA 5830434F19 gene                       | 5830434F19 | 2.69  | 3.12E-05 |
| 1419455_at   | interleukin 10 receptor, beta                    | Il10rb     | 2.69  | 2.72E-10 |
| 1431966_at   | ATP/GTP binding protein-like 3                   | Agbl3      | 2.69  | 3.18E-05 |
| 1446702_at   | ---                                              | ---        | -2.69 | 8.17E-04 |
| 1431172_at   | origin recognition complex, subunit 4-like       | Orc4l      | -2.69 | 1.46E-06 |
| 1452812_at   | latrophilin 1                                    | Lphn1      | -2.68 | 1.04E-05 |
| 1441964_at   | quaking                                          | Qk         | -2.68 | 6.98E-09 |
| 1444693_at   | ---                                              | ---        | -2.68 | 6.04E-05 |
| 1422138_at   | plasminogen activator, urokinase                 | Plau       | 2.68  | 4.75E-04 |
| 1457443_at   | ---                                              | ---        | -2.68 | 2.97E-05 |
| 1456609_at   | calcium/calmodulin-dependent protein kinase      | Camk2n1    | 2.67  | 8.52E-11 |
| 1459649_at   | ---                                              | ---        | 2.67  | 1.18E-04 |
| 1443162_at   | ---                                              | ---        | 2.66  | 2.63E-05 |
| 1433159_at   | kinesin family member 13B                        | Kif13b     | 2.66  | 3.60E-05 |
| 1454297_at   | RIKEN cDNA 4631402F24 gene                       | 4631402F24 | 2.66  | 3.11E-06 |
| 1435971_at   | regulating synaptic membrane exocytosis 3        | Rims3      | 2.65  | 9.71E-08 |
| 1441600_at   | hypothetical protein C920021A13                  | C920021A13 | -2.65 | 7.73E-05 |
| 1448754_at   | retinol binding protein 1, cellular              | Rbp1       | -2.65 | 1.57E-07 |
| 1431221_at   | RIKEN cDNA 5830405M20 gene                       | 5830405M20 | 2.65  | 1.32E-04 |
| 1445201_at   | zinc finger protein 53                           | Zfp53      | 2.65  | 3.22E-07 |
| 1421296_at   | tumor necrosis factor receptor superfamily       | Tnfrsf10b  | 2.65  | 1.73E-06 |
| 1447167_at   | ---                                              | ---        | 2.65  | 2.76E-06 |

|              |                                            |              |       |          |
|--------------|--------------------------------------------|--------------|-------|----------|
| 1440893_at   | RIO kinase 1 (yeast)                       | Riok1        | -2.64 | 2.15E-07 |
| 1434767_at   | expressed sequence C79407                  | C79407       | -2.64 | 8.52E-07 |
| 1442014_at   | ---                                        | ---          | -2.64 | 1.59E-06 |
| 1459144_at   | ---                                        | ---          | 2.64  | 6.16E-07 |
| 1446496_at   | transformer 2 beta homolog (Drosophila)    | Tra2b        | -2.64 | 5.34E-04 |
| 1418857_at   | solute carrier family 13 (sodium-depende   | Slc13a2      | -2.64 | 3.19E-07 |
| 1447451_at   | ---                                        | ---          | 2.64  | 7.02E-05 |
| 1432867_at   | RIKEN cDNA 9230112J17 gene                 | 9230112J17   | -2.64 | 3.82E-04 |
| 1454674_at   | fasciculation and elongation protein zeta  | Fez1         | 2.64  | 1.31E-05 |
| 1456502_at   | dual-specificity tyrosine-(Y)-phosphoryla  | Dyrk2 /// LC | -2.64 | 3.71E-06 |
| 1432843_at   | RIKEN cDNA 5730405O12 gene                 | 5730405O1    | 2.64  | 4.20E-06 |
| 1435407_at   | Zinc finger with KRAB and SCAN doma        | Zkscan16     | 2.63  | 4.68E-04 |
| 1421444_at   | progesterone receptor                      | Pgr          | -2.63 | 5.89E-07 |
| 1434795_at   | dispatched homolog 1 (Drosophila)          | Disp1        | 2.63  | 2.09E-08 |
| 1423508_at   | MYST histone acetyltransferase monocy      | Myst4        | -2.63 | 1.66E-08 |
| 1440231_at   | microtubule-associated protein 9           | Mtap9        | 2.63  | 2.16E-04 |
| 1428484_at   | oxysterol binding protein-like 3           | Osbpl3       | 2.63  | 2.03E-09 |
| 1459846_x_at | canopy 2 homolog (zebrafish)               | Cnpy2        | 2.63  | 9.36E-07 |
| 1456795_at   | BEN domain containing 4                    | Bend4        | 2.63  | 1.51E-07 |
| 1458812_at   | ---                                        | ---          | -2.62 | 2.79E-06 |
| 1452656_at   | zinc finger, DHHC domain containing 2      | Zdhhc2       | -2.62 | 1.72E-03 |
| 1434726_at   | transmembrane protein 146                  | Tmem146      | -2.62 | 9.82E-06 |
| 1422184_a_at | adenylate kinase 1                         | Ak1          | 2.62  | 3.15E-06 |
| 1431119_at   | DnaJ (Hsp40) related, subfamily B, mem     | Dnajb13      | -2.62 | 4.13E-04 |
| 1418531_at   | oocyte secreted protein 1                  | Oosp1        | 2.62  | 3.17E-05 |
| 1452843_at   | interleukin 6 signal transducer            | Il6st        | -2.62 | 1.20E-04 |
| 1425166_at   | retinoblastoma-like 1 (p107)               | Rbl1         | -2.62 | 2.22E-07 |
| 1430064_at   | tubulin tyrosine ligase-like family, memb  | Ttl11        | -2.62 | 8.57E-06 |
| 1424394_at   | selenoprotein M                            | Selm         | 2.62  | 7.55E-06 |
| 1430442_at   | nitric oxide synthase 1 (neuronal) adapt   | Nos1ap       | -2.62 | 2.77E-05 |
| 1433398_at   | FYVE, RhoGEF and PH domain contain         | Fgd3         | -2.62 | 6.54E-07 |
| 1434885_at   | SPT2, Suppressor of Ty, domain contain     | Spty2d1      | -2.62 | 1.33E-03 |
| 1417128_at   | pleckstrin homology domain containing,     | Plekho1      | 2.61  | 2.42E-06 |
| 1455908_a_at | serine carboxypeptidase 1                  | Scpep1       | 2.61  | 2.17E-04 |
| 1459450_at   | ---                                        | ---          | 2.61  | 3.54E-04 |
| 1449299_at   | low density lipoprotein receptor-related p | Lrp5         | -2.61 | 2.58E-05 |
| 1441339_at   | chromodomain helicase DNA binding pr       | Chd9         | 2.61  | 8.05E-07 |
| 1459383_at   | CDNA sequence BC049807                     | BC049807     | 2.61  | 2.30E-06 |
| 1426276_at   | interferon induced with helicase C domai   | Ifih1        | 2.61  | 1.24E-05 |
| 1455750_at   | Ral GTPase activating protein, alpha sub   | Ralgapa2     | -2.60 | 3.91E-08 |
| 1442572_at   | ---                                        | ---          | -2.60 | 4.07E-04 |
| 1439600_at   | ---                                        | ---          | 2.60  | 5.41E-06 |
| 1452958_at   | aspartate beta-hydroxylase domain conta    | Asphd2       | -2.60 | 3.24E-04 |
| 1442079_at   | sphingomyelin synthase 1                   | Sgms1        | 2.60  | 4.04E-07 |
| 1417821_at   | DNA segment, Chr 17, human D6S56E 5        | D17H6S56E    | -2.60 | 3.68E-04 |
| 1433525_at   | endothelin receptor type A                 | Ednra        | -2.60 | 3.39E-06 |
| 1452305_s_at | centromere protein N                       | Cenpn        | -2.60 | 7.51E-04 |

|              |                                                               |                  |       |          |
|--------------|---------------------------------------------------------------|------------------|-------|----------|
| 1442800_x_at | family with sequence similarity 181, member 1                 | Fam181b          | -2.60 | 1.34E-05 |
| 1424448_at   | tripartite motif-containing 6                                 | Trim6            | 2.60  | 2.05E-04 |
| 1460457_at   | RIKEN cDNA 2810405F17 gene                                    | 2810405F17       | 2.60  | 1.16E-04 |
| 1435468_at   | UDP-GlcNAc:betaGal beta-1,3-N-acetylglucosaminyltransferase 9 | B3gnt9           | 2.60  | 6.89E-06 |
| 1439766_x_at | vascular endothelial growth factor C                          | Vegfc            | 2.60  | 4.08E-10 |
| 1424118_a_at | SPC25, NDC80 kinetochore complex component                    | Spc25            | -2.60 | 1.85E-04 |
| 1421211_a_at | class II transactivator                                       | Ciita            | 2.60  | 9.41E-07 |
| 1455609_at   | citron                                                        | Cit              | -2.60 | 5.52E-04 |
| 1436415_at   | mediator complex subunit 29                                   | Med29            | -2.59 | 4.16E-06 |
| 1415972_at   | myristoylated alanine rich protein kinase                     | Marcks           | 2.59  | 6.53E-04 |
| 1423403_at   | mitogen-activated protein kinase binding protein 1            | Mapkbp1          | -2.59 | 1.32E-07 |
| 1448686_at   | interleukin 16                                                | Il16             | 2.59  | 1.70E-08 |
| 1459362_at   | ---                                                           | ---              | 2.58  | 2.56E-05 |
| 1441051_at   | tripartite motif-containing 27                                | Trim27           | -2.58 | 2.57E-05 |
| 1449164_at   | CD68 antigen                                                  | Cd68             | 2.58  | 1.32E-06 |
| 1449110_at   | ras homolog gene family, member B                             | Rhob             | -2.58 | 2.04E-05 |
| 1423757_x_at | insulin-like growth factor binding protein 4                  | Igfbp4           | 2.58  | 1.02E-06 |
| 1435627_x_at | MARCKS-like 1                                                 | Marcks11         | -2.57 | 5.19E-04 |
| 1438021_at   | RNA binding motif protein 47                                  | Rbm47            | 2.57  | 5.59E-04 |
| 1429146_at   | small VCP/p97-interacting protein                             | Svip             | -2.57 | 1.00E-07 |
| 1441885_s_at | ---                                                           | ---              | 2.57  | 1.96E-04 |
| 1430341_at   | nudix (nucleoside diphosphate linked moiety X) motif 5        | Nudt5            | 2.57  | 1.66E-04 |
| 1419153_at   | RIKEN cDNA 2810417H13 gene                                    | 2810417H13       | -2.57 | 2.76E-05 |
| 1443387_at   | expressed sequence BB045044                                   | BB045044         | 2.57  | 7.54E-08 |
| 1435382_at   | necdin                                                        | Ndn              | 2.57  | 1.05E-04 |
| 1418901_at   | CCAAT/enhancer binding protein (C/EBP) beta                   | Cebpb            | -2.57 | 1.86E-04 |
| 1451363_a_at | DENN/MADD domain containing 2D                                | Dennd2d          | 2.57  | 4.39E-07 |
| 1449220_at   | GTPase, IMAP family member 3 /// similar to IMAP3             | Gimap3 /// Imap3 | -2.56 | 2.74E-04 |
| 1416383_a_at | pyruvate carboxylase                                          | Pcx              | -2.56 | 1.24E-06 |
| 1417890_at   | pyridoxal (pyridoxine, vitamin B6) phosphate oxidoreductase   | Pdpx             | -2.56 | 1.12E-04 |
| 1428288_at   | Kruppel-like factor 9                                         | Klf9             | -2.56 | 3.43E-08 |
| 1442414_at   | Ring finger protein 103                                       | Rnf103           | -2.56 | 1.61E-07 |
| 1446613_at   | ---                                                           | ---              | 2.56  | 2.44E-06 |
| 1442738_at   | ---                                                           | ---              | 2.56  | 6.79E-07 |
| 1460526_at   | RIKEN cDNA 4833420L08 gene                                    | 4833420L08       | -2.56 | 8.14E-07 |
| 1428967_at   | insulin-like growth factor I receptor                         | Igflr            | -2.56 | 3.56E-07 |
| 1421923_at   | SH3-domain binding protein 5 (BTK-associated)                 | Sh3bp5           | 2.55  | 2.49E-07 |
| 1459563_x_at | ---                                                           | ---              | -2.55 | 2.94E-06 |
| 1425118_at   | spire homolog 2 (Drosophila)                                  | Spire2           | 2.55  | 3.34E-07 |
| 1443155_at   | ---                                                           | ---              | -2.54 | 3.22E-08 |
| 1454758_a_at | TSC22 domain family, member 1                                 | Tsc22d1          | 2.54  | 3.83E-08 |
| 1455732_at   | RIKEN cDNA 1700025G04 gene                                    | 1700025G04       | 2.54  | 1.75E-04 |
| 1439348_at   | S100 calcium binding protein A10 (calpain I)                  | S100a10          | 2.54  | 1.48E-04 |
| 1437449_at   | radical S-adenosyl methionine domain containing protein 1     | Rsad1            | -2.54 | 2.43E-05 |
| 1436455_at   | aspartate-beta-hydroxylase                                    | Asph             | -2.54 | 3.91E-05 |
| 1455175_at   | PHD finger protein 13                                         | Phf13            | 2.54  | 3.64E-09 |
| 1418255_s_at | serum response factor                                         | Srf              | -2.54 | 5.01E-05 |

|              |                                             |             |       |          |
|--------------|---------------------------------------------|-------------|-------|----------|
| 1458718_at   | ---                                         | ---         | 2.54  | 3.42E-06 |
| 1426711_at   | transmembrane and coiled-coil domains       | Tmco3       | -2.54 | 1.01E-08 |
| 1453775_at   | RPTOR independent companion of MTC          | Rictor      | -2.53 | 2.05E-06 |
| 1453557_at   | RIKEN cDNA 4930562F07 gene                  | 4930562F07  | 2.53  | 2.78E-04 |
| 1416435_at   | lymphotoxin B receptor                      | Ltbr        | 2.53  | 1.05E-05 |
| 1428509_at   | myosin IE                                   | Myo1e       | 2.53  | 3.34E-07 |
| 1441418_at   | ---                                         | ---         | 2.53  | 2.19E-04 |
| 1436406_at   | ---                                         | ---         | 2.53  | 1.16E-05 |
| 1444197_at   | Ras and Rab interactor-like                 | Rin1        | 2.53  | 2.75E-06 |
| 1456632_at   | B-cell CLL/lymphoma 11A (zinc finger p      | Bcl11a      | 2.53  | 9.78E-05 |
| 1444931_at   | ---                                         | ---         | -2.53 | 1.70E-03 |
| 1447035_at   | RIKEN cDNA A230091C14 gene                  | A230091C14  | 2.53  | 1.60E-05 |
| 1455747_at   | gamma-glutamyltransferase 5                 | Ggt5        | -2.53 | 8.08E-06 |
| 1460231_at   | interferon regulatory factor 5              | Irf5        | 2.53  | 2.87E-06 |
| 1456401_at   | calcium channel, voltage-dependent, beta    | Cacnb2      | -2.53 | 4.78E-04 |
| 1429444_at   | RAS-like, family 11, member A               | Ras11a      | -2.53 | 7.94E-04 |
| 1424594_at   | sterile alpha motif domain containing 4     | Samd4       | -2.53 | 7.37E-04 |
| 1440455_at   | calcium/calmodulin-dependent protein ki     | Camk2n1     | 2.52  | 8.71E-07 |
| 1418809_at   | paired-Ig-like receptor A2                  | Pira2       | 2.52  | 5.18E-07 |
| 1439036_a_at | ATPase, Na+/K+ transporting, beta 1 pol     | Atp1b1      | 2.52  | 1.63E-05 |
| 1437071_at   | eukaryotic translation initiation factor 1A | Eif1ax      | -2.52 | 3.08E-07 |
| 1425416_s_at | proline/serine-rich coiled-coil 1           | Psrc1       | 2.52  | 2.69E-08 |
| 1429134_at   | human immunodeficiency virus type I en      | Hivep3      | 2.52  | 2.08E-09 |
| 1425053_at   | isochorismatase domain containing 1         | Isoc1       | -2.52 | 3.81E-08 |
| 1417334_at   | serine/threonine kinase 19                  | Stk19       | 2.52  | 1.26E-07 |
| 1422817_at   | glycoprotein 5 (platelet)                   | Gp5         | -2.52 | 1.91E-06 |
| 1419386_at   | mucin 13, epithelial transmembrane          | Muc13       | 2.52  | 2.16E-05 |
| 1451777_at   | DEAD (Asp-Glu-Ala-Asp) box polypepti        | Ddx60       | 2.52  | 1.27E-08 |
| 1423680_at   | fatty acid desaturase 1                     | Fads1       | -2.51 | 1.66E-10 |
| 1458974_at   | ---                                         | ---         | -2.51 | 2.03E-05 |
| 1422272_at   | per-hexamer repeat gene 4                   | Phxr4       | 2.51  | 5.47E-08 |
| 1449868_at   | T-box 6                                     | Tbx6        | 2.51  | 3.27E-09 |
| 1423768_at   | unc-93 homolog B1 (C. elegans)              | Unc93b1     | 2.51  | 1.17E-04 |
| 1430286_s_at | Ppp1r14c pseudogene /// protein phosphat    | Gm14057 /// | -2.51 | 4.48E-04 |
| 1427106_at   | zinc finger and BTB domain containing 3     | Zbtb3       | 2.51  | 7.37E-04 |
| 1446497_at   | ---                                         | ---         | -2.50 | 4.35E-05 |
| 1429268_at   | RIKEN cDNA 2610318N02 gene                  | 2610318N02  | -2.50 | 2.72E-05 |
| 1458501_at   | vesicle-associated membrane protein, ass    | Vapb        | 2.50  | 5.13E-06 |
| 1458176_at   | Period homolog 3 (Drosophila)               | Per3        | 2.50  | 3.95E-05 |
| 1436199_at   | tripartite motif-containing 14              | Trim14      | 2.50  | 2.89E-07 |
| 1438568_at   | MAS-related GPR, member E                   | Mrgpre      | 2.50  | 5.03E-05 |
| 1417822_at   | DNA segment, Chr 17, human D6S56E5          | D17H6S56E5  | -2.50 | 4.35E-04 |
| 1436368_at   | solute carrier family 16 (monocarboxylic    | Slc16a10    | -2.50 | 5.55E-06 |
| 1439937_at   | Transmembrane 9 superfamily member 1        | Tm9sf1      | 2.50  | 1.37E-06 |
| 1429785_at   | RIKEN cDNA 5830458C19 gene                  | 5830458C19  | -2.49 | 7.34E-04 |
| 1448545_at   | syndecan 2                                  | Sdc2        | 2.49  | 1.41E-04 |
| 1459713_s_at | anoctamin 1, calcium activated chloride c   | Ano1        | -2.49 | 6.26E-05 |

|              |                                             |              |       |          |
|--------------|---------------------------------------------|--------------|-------|----------|
| 1446330_at   | ---                                         | ---          | 2.49  | 2.10E-04 |
| 1441482_at   | ---                                         | ---          | 2.49  | 4.11E-04 |
| 1429281_at   | RIKEN cDNA 2610008E11 gene                  | 2610008E11   | 2.49  | 8.16E-07 |
| 1419091_a_at | annexin A2                                  | Anxa2        | -2.48 | 8.83E-04 |
| 1431812_a_at | solute carrier family 6 (neurotransmitter t | Slc6a9       | 2.48  | 4.59E-05 |
| 1420187_at   | expressed sequence C76628                   | C76628       | -2.48 | 7.02E-04 |
| 1453956_a_at | cyclin-dependent kinase 14                  | Cdk14        | -2.48 | 1.38E-03 |
| 1454296_at   | RIKEN cDNA 4631402F24 gene                  | 4631402F24   | 2.48  | 2.03E-06 |
| 1438173_x_at | polyamine-modulated factor 1                | Pmf1         | -2.48 | 4.85E-07 |
| 1430415_at   | PHD finger protein 6                        | Phf6         | -2.48 | 8.46E-07 |
| 1426640_s_at | tribbles homolog 2 (Drosophila)             | Trib2        | 2.48  | 1.38E-05 |
| 1422788_at   | solute carrier family 43, member 3          | Slc43a3      | 2.48  | 6.14E-10 |
| 1440171_x_at | RIKEN cDNA 1700049G17 gene                  | 1700049G17   | 2.48  | 1.06E-08 |
| 1419148_at   | advillin                                    | Avil         | 2.48  | 4.52E-07 |
| 1455434_a_at | kinectin 1                                  | Ktn1         | -2.47 | 8.72E-07 |
| 1454795_at   | Cobl-like 1                                 | Cobl1        | 2.47  | 9.48E-08 |
| 1421960_at   | adenylate cyclase 3                         | Adcy3        | 2.47  | 1.76E-04 |
| 1434140_at   | mcf.2 transforming sequence-like            | Mcf2l        | 2.47  | 5.57E-08 |
| 1421969_a_at | fatty acid amide hydrolase                  | Faah         | 2.47  | 1.75E-06 |
| 1436225_at   | transient receptor potential cation channe  | Trpm2        | 2.47  | 2.83E-05 |
| 1428400_at   | RIKEN cDNA 2200002K05 gene                  | 2200002K05   | 2.47  | 2.40E-05 |
| 1450973_s_at | mitogen-activated protein kinase binding    | Mapkbp1      | -2.47 | 4.46E-08 |
| 1443027_at   | ---                                         | ---          | 2.47  | 2.14E-08 |
| 1447616_at   | ---                                         | ---          | 2.47  | 6.17E-07 |
| 1433558_at   | disabled homolog 2 (Drosophila) interact    | Dab2ip       | 2.47  | 8.08E-08 |
| 1435415_x_at | MARCKS-like 1                               | Marcks1l     | -2.47 | 3.01E-05 |
| 1425156_at   | guanylate binding protein 6                 | Gbp6         | 2.47  | 3.54E-09 |
| 1443248_at   | transmembrane and coiled-coil domains       | Tmco3        | -2.47 | 7.41E-09 |
| 1440337_at   | ---                                         | ---          | 2.46  | 2.13E-04 |
| 1415892_at   | sphingosine phosphate lyase 1               | Sgpl1        | 2.46  | 1.73E-09 |
| 1459338_at   | ---                                         | ---          | -2.46 | 5.88E-06 |
| 1452982_at   | insulin-like growth factor I receptor       | Igf1r        | -2.45 | 5.33E-09 |
| 1415913_at   | predicted gene 15483 /// ribosomal protei   | Gm15483 ///  | -2.45 | 7.54E-05 |
| 1447113_at   | ---                                         | ---          | -2.45 | 5.70E-06 |
| 1431980_a_at | arsenic (+3 oxidation state) methyltransfe  | As3mt        | 2.45  | 9.71E-08 |
| 1445467_at   | ---                                         | ---          | -2.45 | 1.37E-06 |
| 1444273_at   | expressed sequence AW555355                 | AW555355     | 2.45  | 7.30E-09 |
| 1425514_at   | phosphatidylinositol 3-kinase, regulatory   | Pik3r1       | -2.45 | 9.64E-07 |
| 1421688_a_at | chemokine (C-C motif) ligand 1              | Ccl1         | 2.45  | 4.12E-05 |
| 1422938_at   | B-cell leukemia/lymphoma 2                  | Bcl2         | -2.45 | 3.74E-08 |
| 1437284_at   | frizzled homolog 1 (Drosophila)             | Fzd1         | -2.45 | 8.90E-04 |
| 1440880_at   | metallophosphoesterase 1                    | Mppe1        | -2.45 | 5.40E-06 |
| 1458968_at   | expressed sequence C80283                   | C80283       | -2.45 | 4.85E-04 |
| 1458324_x_at | ---                                         | ---          | 2.45  | 1.02E-03 |
| 1441684_at   | tetratricopeptide repeat domain 3           | Ttc3         | 2.45  | 4.92E-08 |
| 1433673_at   | RIKEN cDNA E130309D14 gene                  | E130309D14   | -2.45 | 8.15E-07 |
| 1425837_a_at | CCR4 carbon catabolite repression 4-like    | Ccrn4l /// L | 2.44  | 1.52E-04 |

|              |                                             |            |       |          |
|--------------|---------------------------------------------|------------|-------|----------|
| 1441589_at   | ---                                         | ---        | 2.44  | 1.71E-05 |
| 1446786_at   | ---                                         | ---        | -2.44 | 3.57E-06 |
| 1434327_at   | RIKEN cDNA 2610020H08 gene                  | 2610020H0  | 2.44  | 4.39E-09 |
| 1429170_a_at | metal response element binding transcrip    | Mtf1       | -2.44 | 2.49E-07 |
| 1442692_at   | ---                                         | ---        | 2.44  | 3.04E-06 |
| 1417289_at   | pleckstrin homology domain-containing,      | Plekha2    | 2.44  | 6.80E-08 |
| 1444185_at   | ---                                         | ---        | 2.44  | 1.85E-05 |
| 1443912_at   | ---                                         | ---        | -2.44 | 3.21E-04 |
| 1417505_s_at | predicted gene 13305 /// predicted gene 2   | Gm13305 // | 2.44  | 1.30E-06 |
| 1460592_at   | erythrocyte protein band 4.1-like 1         | Epb4.111   | 2.44  | 1.20E-04 |
| 1445105_at   | ---                                         | ---        | 2.44  | 4.19E-05 |
| 1436515_at   | BTB and CNC homology 2                      | Bach2      | -2.44 | 4.81E-06 |
| 1458525_at   | ---                                         | ---        | 2.44  | 1.15E-04 |
| 1429364_at   | RIKEN cDNA 4930579G24 gene                  | 4930579G2  | -2.44 | 8.75E-07 |
| 1417558_at   | Fyn proto-oncogene                          | Fyn        | 2.43  | 3.33E-06 |
| 1428285_at   | RIKEN cDNA 8430427H17 gene                  | 8430427H1  | -2.43 | 1.83E-08 |
| 1428646_at   | region containing RIKEN cDNA 231005         | LOC676870  | -2.43 | 2.53E-05 |
| 1422966_a_at | transferrin receptor                        | Tfrc       | -2.43 | 1.08E-04 |
| 1427351_s_at | immunoglobulin heavy chain 6 (heavy ch      | Igh-6      | 2.43  | 4.14E-07 |
| 1420178_at   | ---                                         | ---        | -2.43 | 2.23E-07 |
| 1428660_s_at | similar to ADIR1 /// torsin family 3, mem   | LOC100047  | 2.43  | 8.43E-07 |
| 1441759_at   | predicted gene 10804                        | Gm10804    | 2.43  | 1.33E-05 |
| 1421207_at   | leukemia inhibitory factor                  | Lif        | -2.43 | 4.65E-06 |
| 1418710_at   | CD59a antigen                               | Cd59a      | -2.42 | 4.97E-09 |
| 1451382_at   | ChaC, cation transport regulator-like 1 (B  | Chac1      | -2.42 | 6.57E-05 |
| 1435132_at   | dispatched homolog 1 (Drosophila)           | Disp1      | 2.42  | 4.93E-09 |
| 1432184_a_at | inverted formin, FH2 and WH2 domain c       | Inf2       | 2.42  | 1.62E-03 |
| 1428057_a_at | AHNAK nucleoprotein (desmoyokin)            | Ahnak      | 2.42  | 4.33E-06 |
| 1437197_at   | sorbin and SH3 domain containing 2          | Sorbs2     | 2.42  | 1.70E-05 |
| 1448688_at   | podocalyxin-like                            | Podxl      | -2.42 | 2.76E-04 |
| 1435524_at   | small nucleolar RNA host gene 8             | Snhg8      | -2.42 | 1.13E-05 |
| 1425379_at   | hepatocyte growth factor                    | Hgf        | -2.42 | 2.19E-07 |
| 1424768_at   | caldesmon 1                                 | Cald1      | 2.42  | 1.01E-04 |
| 1422518_at   | calcium/calmodulin-dependent serine pro     | Cask       | 2.42  | 2.63E-04 |
| 1452408_at   | ---                                         | ---        | -2.41 | 5.31E-05 |
| 1437370_at   | shugoshin-like 2 (S. pombe)                 | Sgol2      | -2.41 | 1.08E-06 |
| 1446294_at   | Transcription factor 12                     | Tcf12      | -2.41 | 1.37E-04 |
| 1448596_at   | solute carrier family 6 (neurotransmitter t | Slc6a8     | 2.41  | 1.00E-07 |
| 1434695_at   | denticleless homolog (Drosophila)           | Dtl        | -2.41 | 2.03E-06 |
| 1437667_a_at | BTB and CNC homology 2                      | Bach2      | -2.41 | 7.60E-07 |
| 1449151_at   | cyclin-dependent kinase 18                  | Cdk18      | 2.41  | 1.23E-03 |
| 1449482_at   | histone cluster 3, H2ba                     | Hist3h2ba  | -2.41 | 3.94E-06 |
| 1417019_a_at | cell division cycle 6 homolog (S. cerevisi  | Cdc6       | 2.41  | 1.95E-09 |
| 1454971_x_at | TSC22 domain family, member 1               | Tsc22d1    | 2.41  | 2.83E-07 |
| 1433078_at   | RIKEN cDNA 5830435N06 gene                  | 5830435N0  | -2.41 | 2.09E-05 |
| 1441805_at   | Predicted gene 2629                         | Gm2629     | 2.41  | 1.00E-03 |
| 1445522_at   | ATPase, class I, type 8B, member 4          | Atp8b4     | 2.41  | 2.09E-04 |



|              |                                                             |               |       |          |
|--------------|-------------------------------------------------------------|---------------|-------|----------|
| 1415802_at   | solute carrier family 16 (monocarboxylic acid transporters) | Slc16a1       | -2.40 | 5.20E-07 |
| 1439520_at   | denticleless homolog (Drosophila)                           | Dtl           | -2.40 | 5.84E-05 |
| 1449826_a_at | fibroblast growth factor 2                                  | Fgf2          | -2.40 | 1.03E-03 |
| 1432606_at   | RIKEN cDNA 2610012C04 gene                                  | 2610012C04    | -2.40 | 1.26E-05 |
| 1428566_at   | Hspb associated protein 1                                   | Hspbap1       | 2.40  | 1.19E-05 |
| 1437939_s_at | cathepsin C                                                 | Ctsc          | -2.40 | 1.35E-05 |
| 1429470_at   | speedy homolog A (Xenopus laevis)                           | Spdya         | -2.39 | 5.95E-06 |
| 1446675_at   | adenosine kinase                                            | Adk           | 2.39  | 4.44E-06 |
| 1443546_at   | ---                                                         | ---           | -2.39 | 5.98E-04 |
| 1424138_at   | rhomboid family 1 (Drosophila)                              | Rhbdf1        | 2.39  | 1.73E-05 |
| 1439826_at   | heat shock protein 14                                       | Hspa14        | -2.39 | 9.71E-04 |
| 1434171_at   | zinc finger protein 874                                     | Zfp874        | 2.39  | 4.46E-09 |
| 1456169_at   | thiosulfate sulfurtransferase (rhodanese)-like 1            | Tstd1         | 2.39  | 1.60E-06 |
| 1435089_at   | RIKEN cDNA 2010111I01 gene                                  | 2010111I01    | -2.39 | 3.28E-07 |
| 1450436_s_at | DnaJ (Hsp40) homolog, subfamily B, member 5                 | Dnajb5        | 2.39  | 1.21E-05 |
| 1455904_at   | growth arrest specific 5 /// small nucleolar RNA G          | Gas5 /// Snog | -2.39 | 2.00E-05 |
| 1432478_a_at | ring finger protein 19B                                     | Rnf19b        | -2.38 | 1.20E-06 |
| 1436993_x_at | profilin 2                                                  | Pfn2          | -2.38 | 1.57E-04 |
| 1421188_at   | chemokine (C-C motif) receptor 2                            | Ccr2          | 2.38  | 1.13E-03 |
| 1457544_at   | ubiquitin-conjugating enzyme E2W (putative)                 | Ube2w         | 2.38  | 1.25E-05 |
| 1417995_at   | protein tyrosine phosphatase, non-receptor type 22          | Ptpn22        | -2.38 | 3.16E-09 |
| 1429830_a_at | CD59a antigen                                               | Cd59a         | -2.38 | 4.39E-11 |
| 1441060_at   | RIKEN cDNA 2900052L18 gene                                  | 2900052L18    | 2.38  | 2.05E-04 |
| 1452592_at   | microsomal glutathione S-transferase 2                      | Mgst2         | -2.38 | 7.55E-08 |
| 1439814_at   | ATPase, class I, type 8B, member 4                          | Atp8b4        | 2.37  | 4.58E-06 |
| 1435405_at   | SET domain containing 4                                     | Setd4         | 2.37  | 8.23E-07 |
| 1441005_at   | regulation of nuclear pre-mRNA domain                       | Rprd1b        | -2.37 | 6.59E-06 |
| 1417884_at   | solute carrier family 16 (monocarboxylic acid transporters) | Slc16a6       | -2.37 | 1.01E-09 |
| 1451332_at   | zinc finger protein 521                                     | Zfp521        | -2.37 | 3.46E-07 |
| 1440104_at   | RAN binding protein 2                                       | Ranbp2        | -2.37 | 4.62E-06 |
| 1438349_at   | zinc finger protein                                         | Zfp229        | 2.37  | 2.82E-09 |
| 1444890_at   | ---                                                         | ---           | 2.37  | 5.35E-04 |
| 1429703_at   | RIKEN cDNA 2900072G11 gene                                  | 2900072G11    | -2.37 | 9.01E-05 |
| 1429165_at   | RIKEN cDNA 3110001I22 gene                                  | 3110001I22    | -2.37 | 5.26E-05 |
| 1452013_at   | ATPase, class V, type 10A                                   | Atp10a        | 2.37  | 7.51E-08 |
| 1446179_at   | ---                                                         | ---           | -2.37 | 9.85E-07 |
| 1418405_at   | hepatocyte growth factor activator                          | Hgfac         | 2.36  | 4.25E-06 |
| 1438542_at   | Transformation related protein 53                           | Trp53         | -2.36 | 1.62E-07 |
| 1416646_at   | alpha fetoprotein                                           | Afp           | 2.36  | 1.46E-03 |
| 1418592_at   | DnaJ (Hsp40) homolog, subfamily A, member 4                 | Dnaja4        | -2.36 | 8.44E-09 |
| 1435839_at   | ---                                                         | ---           | -2.36 | 8.18E-06 |
| 1429224_at   | paraneoplastic antigen MA1                                  | Pnma1         | 2.36  | 7.03E-07 |
| 1419457_at   | Rho-guanine nucleotide exchange factor                      | Rgnef         | -2.36 | 2.96E-04 |
| 1432418_a_at | creatine kinase, mitochondrial 1, ubiquitous                | Ckmt1         | 2.36  | 8.40E-04 |
| 1455730_at   | discs, large (Drosophila) homolog-associated protein 5      | Dlgap5        | -2.36 | 8.48E-07 |
| 1423040_at   | basic leucine zipper and W2 domains 1                       | Bzw1          | -2.36 | 5.22E-08 |
| 1457551_at   | ---                                                         | ---           | 2.36  | 2.41E-05 |

|              |                                                 |            |       |          |
|--------------|-------------------------------------------------|------------|-------|----------|
| 1455322_at   | tetratricopeptide repeat domain 21B             | Ttc21b     | -2.36 | 5.42E-09 |
| 1428481_s_at | cell division cycle associated 8                | Cdca8      | -2.36 | 2.83E-06 |
| 1425742_a_at | TSC22 domain family, member 1                   | Tsc22d1    | 2.36  | 1.78E-07 |
| 1438470_at   | suppressor of cytokine signaling 2              | Socs2      | 2.36  | 7.08E-07 |
| 1439188_at   | cleavage and polyadenylation specific factor    | Cpsf6      | 2.36  | 1.16E-07 |
| 1429927_at   | RIKEN cDNA 5830409B07 gene                      | 5830409B07 | -2.35 | 2.81E-04 |
| 1419811_at   | adenylate cyclase 9                             | Adcy9      | -2.35 | 1.43E-03 |
| 1449996_a_at | tropomyosin 3, gamma                            | Tpm3       | -2.35 | 1.65E-05 |
| 1442506_at   | ---                                             | ---        | -2.35 | 9.77E-05 |
| 1426767_at   | WD repeat domain 90                             | Wdr90      | -2.35 | 1.27E-03 |
| 1451780_at   | B-cell linker                                   | Blnk       | -2.35 | 1.19E-06 |
| 1439475_at   | zinc finger protein 429                         | Zfp429     | 2.35  | 1.32E-06 |
| 1455970_at   | phosphodiesterase 5A, cGMP-specific             | Pde5a      | -2.35 | 1.52E-06 |
| 1437876_at   | interleukin 20 receptor beta                    | Il20rb     | -2.35 | 3.31E-05 |
| 1440304_at   | ---                                             | ---        | -2.35 | 1.09E-07 |
| 1451122_at   | isopentenyl-diphosphate delta isomerase         | Idi1       | -2.35 | 1.66E-07 |
| 1442307_at   | ---                                             | ---        | 2.35  | 1.01E-08 |
| 1439552_at   | triple functional domain (TPRF interaction)     | Trio       | -2.35 | 1.20E-06 |
| 1455849_at   | neuron navigator 1                              | Nav1       | -2.35 | 6.36E-06 |
| 1460437_at   | cytohesin 4                                     | Cyth4      | 2.34  | 1.41E-07 |
| 1449802_x_at | RNA pseudouridylate synthase domain containing  | Rpusd2     | -2.34 | 6.39E-04 |
| 1417903_at   | deafness, autosomal dominant 5 (human)          | Dfna5      | 2.34  | 2.62E-09 |
| 1443159_at   | RIKEN cDNA 9130221J17 gene                      | 9130221J17 | -2.34 | 4.09E-05 |
| 1438592_at   | NIMA (never in mitosis gene a)-related e        | Nek1       | 2.34  | 9.57E-04 |
| 1421009_at   | radical S-adenosyl methionine domain containing | Rsad2      | 2.34  | 2.66E-05 |
| 1441969_at   | tripartite motif-containing 36                  | Trim36     | 2.34  | 3.77E-07 |
| 1456111_at   | family with sequence similarity 55, member      | Fam55d     | 2.34  | 5.91E-06 |
| 1435750_at   | GTP cyclohydrolase I feedback regulator         | Gchfr      | -2.34 | 1.47E-04 |
| 1430298_at   | RIKEN cDNA 4930473A06 gene                      | 4930473A06 | 2.34  | 2.24E-04 |
| 1458534_at   | regulator of G-protein signalling 7 binding     | Rgs7bp     | -2.34 | 1.46E-04 |
| 1445103_at   | ---                                             | ---        | 2.34  | 2.97E-06 |
| 1441675_at   | ---                                             | ---        | 2.34  | 5.16E-06 |
| 1417793_at   | immunity-related GTPase family M member         | Irgm2      | 2.33  | 3.45E-07 |
| 1433675_at   | small nucleolar RNA host gene (non-protein      | Snhg1      | -2.33 | 1.32E-07 |
| 1429317_at   | glutamyl-tRNA synthase (glutamine-hydro         | Qrs11      | 2.33  | 3.34E-08 |
| 1435938_at   | cytoskeleton associated protein 2-like          | Ckap2l     | -2.33 | 3.87E-06 |
| 1458820_at   | zinc finger protein 560                         | Zfp560     | 2.33  | 1.68E-06 |
| 1426600_at   | solute carrier family 2 (facilitated glucose    | Slc2a1     | -2.33 | 2.27E-09 |
| 1440716_at   | RIKEN cDNA 6430604M11 gene                      | 6430604M11 | -2.33 | 2.64E-05 |
| 1438797_at   | ---                                             | ---        | 2.33  | 4.39E-07 |
| 1450229_at   | mediator complex subunit 14                     | Med14      | -2.33 | 2.11E-06 |
| 1418210_at   | profilin 2                                      | Pfn2       | -2.32 | 2.72E-05 |
| 1437421_at   | RIKEN cDNA 6330509M05 gene                      | 6330509M05 | 2.32  | 2.98E-07 |
| 1427298_at   | dynamamin 3, opposite strand                    | Dnm3os     | 2.32  | 3.14E-07 |
| 1452912_at   | defective in sister chromatid cohesion 1 h      | Dscc1      | -2.32 | 1.56E-05 |
| 1434817_s_at | regulation of nuclear pre-mRNA domain           | Rprd2      | -2.32 | 5.89E-07 |
| 1436966_at   | pellino 2                                       | Peli2      | -2.32 | 1.03E-05 |

|              |                                           |             |       |          |
|--------------|-------------------------------------------|-------------|-------|----------|
| 1416632_at   | similar to NADP-dependent malic enzym     | LOC677317   | 2.32  | 1.30E-06 |
| 1447500_at   | cut-like homeobox 2                       | Cux2        | -2.32 | 5.49E-04 |
| 1422711_a_at | pregnancy upregulated non-ubiquitously    | Pnck        | 2.32  | 9.91E-06 |
| 1426641_at   | tribbles homolog 2 (Drosophila)           | Trib2       | 2.32  | 6.81E-05 |
| 1447540_at   | tigger transposable element derived 3     | Tigd3       | -2.32 | 1.39E-07 |
| 1458603_at   | ---                                       | ---         | -2.32 | 2.00E-05 |
| 1428097_at   | RIKEN cDNA 2510009E07 gene                | 2510009E07  | 2.32  | 7.56E-08 |
| 1437446_at   | RAB5B, member RAS oncogene family         | Rab5b       | 2.32  | 1.73E-07 |
| 1445270_at   | zinc finger protein 759                   | Zfp759      | 2.32  | 7.81E-06 |
| 1444196_at   | expressed sequence AI662501               | AI662501    | 2.31  | 9.71E-05 |
| 1423862_at   | pleckstrin homology domain containing,    | Plekhf2     | -2.31 | 8.74E-06 |
| 1426867_at   | doublesex and mab-3 related transcriptio  | Dmrt2       | 2.31  | 1.27E-07 |
| 1439487_at   | ligase IV, DNA, ATP-dependent             | Lig4        | 2.31  | 5.08E-08 |
| 1437751_at   | peroxisome proliferative activated recept | Ppargc1a    | -2.31 | 1.80E-03 |
| 1417693_a_at | growth factor receptor bound protein 2-as | Gab1        | 2.31  | 2.48E-04 |
| 1419219_at   | cytochrome P450, family 4, subfamily f,   | Cyp4f18 /// | 2.31  | 1.84E-04 |
| 1454654_at   | disrupted in renal carcinoma 2 (human)    | Dirc2       | 2.31  | 1.56E-06 |
| 1422570_at   | YY1 transcription factor                  | Yy1         | -2.31 | 7.65E-08 |
| 1459595_at   | ---                                       | ---         | 2.31  | 4.00E-09 |
| 1455615_at   | chemokine-like factor                     | Cklf        | 2.31  | 1.79E-05 |
| 1447051_at   | Ring finger protein 43                    | Rnf43       | 2.31  | 3.09E-04 |
| 1445801_at   | predicted gene 2461                       | Gm2461      | 2.31  | 2.94E-06 |
| 1422428_at   | acyl-CoA synthetase bubblegum family n    | Acsbg1      | -2.31 | 5.81E-07 |
| 1441444_at   | Neurobeachin like 1                       | Nbeal1      | 2.30  | 1.45E-05 |
| 1455378_at   | ribosomal modification protein rimK-like  | Rimkla      | -2.30 | 6.61E-07 |
| 1437485_at   | nitric oxide synthase 1 (neuronal) adapto | Nos1ap      | -2.30 | 7.22E-08 |
| 1458341_x_at | phosphodiesterase 5A, cGMP-specific       | Pde5a       | -2.30 | 2.44E-07 |
| 1443336_at   | ---                                       | ---         | 2.30  | 1.28E-03 |
| 1430165_at   | serine/threonine kinase 17b (apoptosis-in | Stk17b      | -2.30 | 3.02E-07 |
| 1459962_at   | RIKEN cDNA 4930523C07 gene                | 4930523C07  | 2.30  | 2.49E-05 |
| 1419110_at   | RIO kinase 1 (yeast)                      | Riok1       | -2.30 | 1.88E-08 |
| 1426555_at   | serine carboxypeptidase 1                 | Scpep1      | 2.30  | 5.06E-06 |
| 1446268_at   | Cytohesin 3                               | Cyth3       | 2.30  | 2.05E-07 |
| 1446972_at   | DNA segment, Chr 15, Wayne State Uni      | D15Wsu126   | 2.29  | 3.54E-06 |
| 1444250_at   | ---                                       | ---         | 2.29  | 1.62E-07 |
| 1426434_at   | transmembrane protein 43                  | Tmem43      | 2.29  | 7.47E-09 |
| 1458311_at   | ubiquitin specific peptidase 36           | Usp36       | -2.29 | 4.62E-06 |
| 1437488_at   | solute carrier family 9 (sodium/hydrogen  | Slc9a9      | 2.29  | 3.53E-08 |
| 1445148_at   | ---                                       | ---         | 2.29  | 7.64E-04 |
| 1415797_at   | discoidin domain receptor family, membe   | Ddr1        | 2.29  | 2.60E-04 |
| 1446670_at   | ---                                       | ---         | 2.29  | 1.39E-07 |
| 1420120_at   | expressed sequence AU020177               | AU020177    | -2.29 | 2.41E-06 |
| 1417327_at   | caveolin 2                                | Cav2        | 2.29  | 2.91E-05 |
| 1453025_at   | MACRO domain containing 2                 | Macro2      | -2.29 | 3.82E-04 |
| 1418350_at   | heparin-binding EGF-like growth factor    | Hbegf       | -2.29 | 4.28E-07 |
| 1443218_at   | ---                                       | ---         | -2.29 | 3.06E-04 |
| 1434291_a_at | small EDRK-rich factor 1                  | Serf1       | 2.28  | 3.41E-06 |

|              |                                               |               |       |          |
|--------------|-----------------------------------------------|---------------|-------|----------|
| 1448547_at   | Ras association (RalGDS/AF-6) domain          | Rassf3        | 2.28  | 2.48E-07 |
| 1448785_at   | runt-related transcription factor 1; transloc | Runx1t1       | 2.28  | 3.32E-05 |
| 1447835_at   | ---                                           | ---           | -2.28 | 3.04E-05 |
| 1447851_x_at | ATPase, class V, type 10A                     | Atp10a        | 2.28  | 1.38E-07 |
| 1416036_at   | FK506 binding protein 1a                      | Fkbp1a        | 2.28  | 1.06E-07 |
| 1438880_at   | RIKEN cDNA 1700012D14 gene                    | 1700012D14    | 2.28  | 5.50E-05 |
| 1444583_at   | nuclear autoantigenic sperm protein (hist     | Nasp          | -2.28 | 1.24E-03 |
| 1434180_at   | fermitin family homolog 2 (Drosophila)        | Fermt2        | 2.28  | 5.22E-07 |
| 1447264_at   | RAB11 family interacting protein 1 (class     | Rab11fip1     | 2.28  | 9.34E-04 |
| 1433617_s_at | UDP-Gal:betaGlcNAc beta 1,4-galactosyl        | B4galt5       | 2.28  | 1.64E-05 |
| 1437716_x_at | kinesin family member 22                      | Kif22         | -2.28 | 1.71E-06 |
| 1422041_at   | paired immunoglobulin-like type 2 receptor    | Pilrb1        | 2.28  | 2.69E-06 |
| 1429207_at   | RIKEN cDNA 5730408K05 gene                    | 5730408K05    | 2.27  | 9.35E-09 |
| 1415857_at   | embigin                                       | Emb           | 2.27  | 7.24E-10 |
| 1448484_at   | S-adenosylmethionine decarboxylase 1          | Amd1          | -2.27 | 5.27E-07 |
| 1458178_at   | ---                                           | ---           | 2.27  | 9.37E-05 |
| 1439986_at   | diacylglycerol kinase, iota                   | Dgki          | -2.27 | 2.56E-05 |
| 1442646_at   | ---                                           | ---           | -2.27 | 6.64E-07 |
| 1448961_at   | phospholipid scramblase 2                     | Plscr2        | 2.27  | 4.83E-07 |
| 1459671_at   | ---                                           | ---           | -2.27 | 1.16E-06 |
| 1427817_at   | hypothetical protein LOC641050                | LOC641050     | 2.27  | 5.82E-05 |
| 1451333_a_at | proacrosin binding protein                    | Acrbp         | 2.27  | 2.19E-07 |
| 1419298_at   | paraoxonase 3                                 | Pon3          | 2.27  | 3.17E-08 |
| 1440444_at   | fatty acid desaturase 1                       | Fads1         | -2.27 | 2.75E-08 |
| 1453248_at   | RIKEN cDNA 2810039B14 gene                    | 2810039B14    | 2.27  | 1.60E-05 |
| 1455983_at   | cell division cycle associated 2              | Cdca2         | -2.27 | 2.76E-04 |
| 1418209_a_at | profilin 2                                    | Pfn2          | -2.27 | 7.68E-05 |
| 1460118_at   | ---                                           | ---           | -2.26 | 1.51E-07 |
| 1441327_a_at | signal sequence receptor, alpha               | Ssr1          | -2.26 | 5.82E-06 |
| 1456806_at   | RIKEN cDNA A130010C12 gene                    | A130010C12    | -2.26 | 3.73E-08 |
| 1427515_at   | pigeon homolog (Drosophila)                   | Pion          | 2.26  | 9.07E-04 |
| 1437900_at   | RIKEN cDNA 4930523C07 gene                    | 4930523C07    | 2.26  | 3.20E-05 |
| 1423754_at   | interferon induced transmembrane protein      | Ifitm3        | -2.26 | 2.90E-08 |
| 1437256_at   | DCN1, defective in cullin neddylation 1,      | Dcun1d5       | 2.26  | 2.43E-07 |
| 1454788_at   | ADP-ribosylation factor-like 4C /// simila    | Arl4c /// LOC | 2.26  | 1.35E-06 |
| 1448944_at   | neuropilin 1                                  | Nrp1          | 2.26  | 1.35E-03 |
| 1418829_a_at | enolase 2, gamma neuronal                     | Eno2          | 2.25  | 4.78E-05 |
| 1422692_at   | SUB1 homolog (S. cerevisiae)                  | Sub1          | -2.25 | 1.33E-05 |
| 1452063_at   | zinc finger and BTB domain containing 8       | Zbtb8a        | -2.25 | 6.74E-07 |
| 1428861_at   | filamin A interacting protein 1-like          | Filip1l       | 2.25  | 3.02E-06 |
| 1441481_at   | microfibrillar-associated protein 3-like      | Mfap3l        | 2.25  | 1.64E-03 |
| 1437136_at   | RIKEN cDNA 5830436I19 gene                    | 5830436I19    | -2.25 | 3.54E-06 |
| 1436008_at   | tumor protein D52                             | Tpd52         | 2.25  | 8.99E-04 |
| 1456846_at   | zinc finger and BTB domain containing 4       | Zbtb42        | 2.25  | 6.64E-06 |
| 1421376_at   | TNF receptor-associated factor 6              | Traf6         | -2.25 | 5.81E-06 |
| 1435471_at   | zinc finger protein 708                       | Zfp708        | 2.25  | 5.81E-06 |
| 1445574_at   | ---                                           | ---           | -2.25 | 7.76E-07 |

|              |                                             |            |       |          |
|--------------|---------------------------------------------|------------|-------|----------|
| 1441671_at   | ---                                         | ---        | 2.25  | 1.25E-05 |
| 1417288_at   | pleckstrin homology domain-containing,      | Plekha2    | 2.25  | 6.13E-08 |
| 1435355_at   | nebulin                                     | Neb        | -2.25 | 2.15E-09 |
| 1459655_at   | ---                                         | ---        | -2.25 | 5.51E-06 |
| 1438915_at   | RIKEN cDNA 6720401G13 gene                  | 6720401G1  | 2.25  | 9.22E-07 |
| 1423804_a_at | isopentenyl-diphosphate delta isomerase     | Idi1       | -2.25 | 6.24E-07 |
| 1446545_at   | ---                                         | ---        | -2.25 | 4.86E-04 |
| 1433093_at   | RIKEN cDNA 2900092N22 gene                  | 2900092N2  | -2.25 | 7.76E-05 |
| 1433241_at   | RIKEN cDNA 9430013L17 gene                  | 9430013L17 | 2.24  | 2.09E-06 |
| 1442127_at   | ---                                         | ---        | 2.24  | 3.77E-04 |
| 1445968_at   | ---                                         | ---        | 2.24  | 3.50E-05 |
| 1453680_at   | RIKEN cDNA 8030456M14 gene                  | 8030456M1  | 2.24  | 1.16E-04 |
| 1455773_at   | ---                                         | ---        | -2.24 | 7.10E-06 |
| 1448232_x_at | predicted gene 3756 /// predicted gene 56   | Gm3756 /// | -2.24 | 3.87E-05 |
| 1426296_at   | RAD52 homolog (S. cerevisiae)               | Rad52      | 2.24  | 6.03E-06 |
| 1439877_at   | ---                                         | ---        | 2.24  | 4.50E-07 |
| 1445746_at   | Eukaryotic translation initiation factor 4E | Eif4h      | -2.24 | 2.42E-04 |
| 1437111_at   | zinc finger CCCH type containing 12C        | Zc3h12c    | -2.24 | 5.39E-08 |
| 1427412_s_at | Rap guanine nucleotide exchange factor (    | Rapgef6    | -2.24 | 2.23E-04 |
| 1446134_at   | expressed sequence C78115                   | C78115     | -2.23 | 1.47E-04 |
| 1424921_at   | bone marrow stromal cell antigen 2          | Bst2       | 2.23  | 1.09E-08 |
| 1447315_at   | ---                                         | ---        | 2.23  | 1.14E-04 |
| 1436745_at   | golgin, RAB6-interacting                    | Gorab      | -2.23 | 7.64E-08 |
| 1452393_at   | AT-hook transcription factor                | Akna       | 2.23  | 1.30E-06 |
| 1435546_a_at | RIKEN cDNA 1810013L24 gene                  | 1810013L24 | 2.23  | 7.74E-10 |
| 1449688_at   | DNA segment, Chr 10, ERATO Doi 610          | D10ErtD610 | 2.23  | 6.35E-05 |
| 1449176_a_at | deoxycytidine kinase                        | Dck        | -2.23 | 7.81E-07 |
| 1454472_at   | RIKEN cDNA 2900092N22 gene                  | 2900092N2  | -2.23 | 8.86E-05 |
| 1426235_a_at | glutamate-ammonia ligase (glutamine syn     | Glul       | -2.23 | 5.72E-08 |
| 1453482_at   | CASP8 and FADD-like apoptosis regulat       | Cflar      | -2.23 | 4.63E-10 |
| 1454933_at   | family with sequence similarity 176, men    | Fam176b    | 2.23  | 1.92E-08 |
| 1448943_at   | neuropilin 1                                | Nrp1       | 2.23  | 1.57E-04 |
| 1424256_at   | retinol dehydrogenase 12                    | Rdh12      | 2.23  | 2.13E-05 |
| 1430291_at   | dedicator of cytokinesis 5                  | Dock5      | 2.23  | 3.10E-06 |
| 1417021_a_at | sporulation protein, meiosis-specific, SP   | Spo11      | -2.23 | 2.42E-04 |
| 1427836_at   | RIKEN cDNA 0610007P08 gene                  | 0610007P08 | -2.22 | 6.96E-06 |
| 1454820_at   | cDNA sequence BC037034                      | BC037034   | 2.22  | 1.80E-06 |
| 1437251_at   | cell division cycle associated 2            | Cdca2      | -2.22 | 1.88E-04 |
| 1453004_at   | solute carrier family 22, member 23         | Slc22a23   | 2.22  | 3.20E-05 |
| 1456346_at   | ---                                         | ---        | -2.22 | 8.29E-05 |
| 1436847_s_at | cell division cycle associated 8            | Cdca8      | -2.22 | 6.06E-06 |
| 1452904_at   | RIKEN cDNA 1700026L06 gene                  | 1700026L06 | 2.22  | 6.18E-06 |
| 1457549_at   | ---                                         | ---        | -2.22 | 1.95E-07 |
| 1435773_at   | RIKEN cDNA 4930547N16 gene                  | 4930547N1  | -2.22 | 6.66E-06 |
| 1442817_at   | RIKEN cDNA A730091E23 gene                  | A730091E2  | 2.22  | 1.65E-06 |
| 1450121_at   | sodium channel, voltage-gated, type I, al   | Scn1a      | -2.22 | 9.42E-04 |
| 1425037_at   | FYVE, RhoGEF and PH domain contain          | Fgd4       | 2.22  | 3.40E-08 |

|              |                                            |              |       |          |
|--------------|--------------------------------------------|--------------|-------|----------|
| 1433863_at   | basic transcription factor 3               | Btf3         | -2.22 | 6.38E-07 |
| 1417219_s_at | thymosin, beta 10                          | Tmsb10       | 2.22  | 1.95E-07 |
| 1416802_a_at | cell division cycle associated 5           | Cdca5        | -2.22 | 1.09E-04 |
| 1419387_s_at | mucin 13, epithelial transmembrane         | Muc13        | 2.22  | 1.20E-04 |
| 1456904_at   | ---                                        | ---          | 2.22  | 2.91E-07 |
| 1426594_at   | FERM domain containing 4B                  | Frm4b        | -2.22 | 6.85E-07 |
| 1418346_at   | insulin-like 6                             | Ins16        | 2.22  | 2.62E-07 |
| 1459885_s_at | cytochrome c oxidase, subunit VIIc /// sir | Cox7c /// LC | -2.21 | 2.08E-10 |
| 1418453_a_at | ATPase, Na+/K+ transporting, beta 1 pol    | Atp1b1       | 2.21  | 9.21E-06 |
| 1438076_at   | ---                                        | ---          | -2.21 | 8.30E-08 |
| 1433043_at   | versican                                   | Vcan         | -2.21 | 2.38E-04 |
| 1434414_at   | FAD-dependent oxidoreductase domain c      | Foxred2      | -2.21 | 3.58E-07 |
| 1417391_a_at | interleukin 16                             | Il16         | 2.21  | 2.02E-07 |
| 1430030_at   | RIKEN cDNA 5330426P16 gene                 | 5330426P16   | 2.21  | 2.01E-08 |
| 1424198_at   | discs, large homolog 5 (Drosophila)        | Dlg5         | 2.21  | 7.89E-04 |
| 1442783_x_at | RNA pseudouridylate synthase domain c      | Rpusd2       | -2.21 | 4.12E-06 |
| 1440717_at   | expressed sequence AA407881                | AA407881     | 2.21  | 1.37E-05 |
| 1460568_at   | tripartite motif-containing 46             | Trim46       | 2.21  | 4.29E-04 |
| 1450355_a_at | capping protein (actin filament), gelsolin | Capg         | 2.21  | 1.49E-08 |
| 1416707_a_at | polyamine-modulated factor 1               | Pmf1         | -2.21 | 1.77E-07 |
| 1438955_x_at | peptidylprolyl isomerase F (cyclophilin F  | Ppif         | -2.21 | 1.15E-06 |
| 1439523_at   | BEN domain containing 4                    | Bend4        | 2.21  | 4.49E-04 |
| 1438247_at   | kelch-like 15 (Drosophila)                 | Klhl15       | -2.21 | 4.73E-07 |
| 1444416_at   | Centromere protein A                       | Cenpa        | -2.21 | 4.15E-04 |
| 1429123_at   | RAB27A, member RAS oncogene family         | Rab27a       | -2.21 | 4.34E-04 |
| 1427819_at   | ---                                        | ---          | -2.21 | 4.82E-06 |
| 1458226_at   | filamin, beta                              | Flnb         | 2.21  | 3.19E-05 |
| 1445381_at   | ---                                        | ---          | -2.21 | 7.65E-07 |
| 1442981_at   | ---                                        | ---          | 2.21  | 5.43E-04 |
| 1424970_at   | purine-rich element binding protein G      | Purg         | 2.20  | 5.51E-09 |
| 1429172_a_at | non-SMC condensin I complex, subunit C     | Ncapg        | -2.20 | 6.47E-06 |
| 1427522_at   | Rho GTPase activating protein 20           | Arhgap20     | 2.20  | 4.01E-06 |
| 1458296_at   | ---                                        | ---          | 2.19  | 5.84E-06 |
| 1425747_at   | dedicator of cytokinesis 5                 | Dock5        | 2.19  | 1.64E-05 |
| 1445600_at   | ---                                        | ---          | -2.19 | 5.55E-06 |
| 1450981_at   | calponin 2                                 | Cnn2         | 2.19  | 1.03E-06 |
| 1440575_at   | heat shock protein 4                       | Hspa4        | -2.19 | 1.14E-04 |
| 1449207_a_at | kinesin family member 20A                  | Kif20a       | -2.19 | 1.21E-05 |
| 1427519_at   | adenosine A2a receptor                     | Adora2a      | -2.19 | 9.04E-08 |
| 1444717_at   | ---                                        | ---          | -2.19 | 3.99E-04 |
| 1417730_at   | exostoses (multiple) 1                     | Ext1         | 2.19  | 1.98E-05 |
| 1451791_at   | tissue factor pathway inhibitor            | Tfpi         | 2.19  | 1.04E-04 |
| 1436058_at   | radical S-adenosyl methionine domain co    | Rsad2        | 2.19  | 5.77E-05 |
| 1444701_at   | mex3 homolog C (C. elegans)                | Mex3c        | -2.18 | 6.25E-04 |
| 1445460_at   | ---                                        | ---          | -2.18 | 1.83E-05 |
| 1455786_at   | zinc finger protein 820                    | Zfp820       | 2.18  | 4.43E-07 |
| 1439453_x_at | ribonuclease H2, subunit C                 | Rnaseh2c     | -2.18 | 4.99E-06 |

|              |                                           |              |       |          |
|--------------|-------------------------------------------|--------------|-------|----------|
| 1418001_at   | integral membrane protein 2B              | Itm2b        | 2.18  | 6.67E-05 |
| 1442475_at   | DNA segment, Chr 14, ERATO Doi 574        | D14ErtD574   | 2.18  | 8.56E-05 |
| 1438345_at   | ---                                       | ---          | -2.18 | 1.06E-06 |
| 1451585_x_at | splA/ryanodine receptor domain and SO     | Spsb2        | 2.18  | 4.72E-06 |
| 1444526_at   | Signal sequence receptor, alpha           | Ssr1         | -2.18 | 1.32E-09 |
| 1450842_a_at | centromere protein A                      | Cenpa        | -2.18 | 2.44E-07 |
| 1423702_at   | H1 histone family, member 0               | H1f0         | -2.18 | 7.00E-11 |
| 1425786_a_at | heat shock transcription factor 4         | Hsf4         | 2.18  | 2.38E-04 |
| 1417271_a_at | endoglin                                  | Eng          | 2.18  | 4.85E-06 |
| 1435226_at   | ring finger protein 19B                   | Rnf19b       | -2.18 | 7.18E-06 |
| 1438764_at   | annexin A7                                | Anxa7        | 2.18  | 3.22E-06 |
| 1428123_at   | family with sequence similarity 125, men  | Fam125b      | -2.18 | 3.51E-04 |
| 1449414_at   | zinc finger protein 53                    | Zfp53        | 2.18  | 2.56E-06 |
| 1444239_at   | Gem (nuclear organelle) associated prote  | Gemin8       | 2.18  | 3.72E-05 |
| 1460710_at   | adenosine A2a receptor                    | Adora2a      | -2.18 | 2.91E-07 |
| 1424074_at   | basic transcription factor 3-like 4       | Btf3l4       | -2.18 | 2.05E-05 |
| 1455535_at   | SRY-box containing gene 5                 | Sox5         | 2.18  | 7.87E-06 |
| 1442107_at   | filamin, beta                             | Flnb         | 2.18  | 5.68E-06 |
| 1429824_at   | RIKEN cDNA 4930550C14 gene                | 4930550C14   | 2.18  | 1.66E-03 |
| 1434033_at   | transducin-like enhancer of split 1, homo | Tle1         | -2.18 | 5.85E-07 |
| 1425052_at   | ---                                       | ---          | -2.17 | 1.00E-05 |
| 1430196_at   | RIKEN cDNA 8430408J09 gene                | 8430408J09   | 2.17  | 5.70E-08 |
| 1436431_at   | RIKEN cDNA 1700025G04 gene                | 1700025G04   | 2.17  | 1.99E-04 |
| 1433661_at   | NLR family member X1                      | NlrX1        | 2.17  | 2.27E-05 |
| 1433674_a_at | small nucleolar RNA host gene (non-prot   | Snhg1        | -2.17 | 3.16E-08 |
| 1439773_at   | lymphocyte antigen 6 complex, locus E     | Ly6e         | 2.17  | 4.99E-04 |
| 1457407_at   | roundabout homolog 1 (Drosophila)         | Robo1        | 2.17  | 4.83E-04 |
| 1441761_at   | Src-like adaptor                          | Sla          | -2.17 | 1.61E-06 |
| 1459884_at   | cytochrome c oxidase, subunit VIIc /// si | Cox7c /// LC | -2.17 | 5.60E-07 |
| 1439783_at   | RIKEN cDNA C330018D20 gene                | C330018D20   | 2.17  | 3.74E-10 |
| 1417195_at   | WW, C2 and coiled-coil domain containi    | Wwc2         | -2.17 | 2.18E-05 |
| 1431018_at   | RIKEN cDNA 1810013L24 gene                | 1810013L24   | 2.17  | 3.15E-04 |
| 1417323_at   | proline/serine-rich coiled-coil 1         | Psrc1        | 2.17  | 4.85E-08 |
| 1427818_at   | ---                                       | ---          | -2.16 | 2.56E-06 |
| 1452783_at   | fibronectin type III domain containing 3B | Fndc3b       | 2.16  | 2.89E-09 |
| 1453678_at   | methyl-CpG binding domain protein 1       | Mbd1         | -2.16 | 3.62E-07 |
| 1440688_at   | Rho GTPase activating protein 26          | Arhgap26     | 2.16  | 2.37E-06 |
| 1441787_at   | zinc finger CCCH type containing 12C      | Zc3h12c      | -2.16 | 2.03E-05 |
| 1458027_at   | mitochondrial ribosomal protein L17       | Mrpl17       | -2.16 | 1.04E-03 |
| 1442087_at   | H3 histone, family 3A                     | H3f3a        | -2.16 | 7.32E-05 |
| 1419561_at   | chemokine (C-C motif) ligand 3            | Ccl3         | -2.16 | 5.38E-05 |
| 1441869_x_at | ---                                       | ---          | -2.16 | 6.42E-08 |
| 1449127_at   | selectin, platelet (p-selectin) ligand    | Selplg       | 2.16  | 4.33E-07 |
| 1433201_at   | RIKEN cDNA 2310079F09 gene                | 2310079F09   | 2.16  | 1.65E-06 |
| 1459361_at   | ---                                       | ---          | -2.16 | 2.65E-04 |
| 1449346_s_at | RIO kinase 1 (yeast)                      | Riok1        | -2.16 | 6.55E-12 |
| 1416052_at   | phosphoribosyl pyrophosphate synthetas    | Prps1        | -2.16 | 8.70E-08 |

|              |                                            |           |       |          |
|--------------|--------------------------------------------|-----------|-------|----------|
| 1419078_at   | ninein                                     | Nin       | 2.16  | 9.25E-07 |
| 1429127_at   | neurotrophin receptor associated death d   | Nradd     | 2.16  | 7.06E-06 |
| 1444604_at   | ---                                        | ---       | 2.16  | 2.28E-04 |
| 1442538_at   | ---                                        | ---       | 2.16  | 1.07E-06 |
| 1418323_at   | feminization 1 homolog b (C. elegans)      | Fem1b     | -2.16 | 1.15E-06 |
| 1441692_at   | ---                                        | ---       | -2.16 | 5.67E-05 |
| 1440627_at   | ATPase, aminophospholipid transporter-     | Atp8a2    | 2.16  | 1.33E-03 |
| 1435213_at   | NHL repeat containing 1                    | Nhlrc1    | 2.15  | 2.41E-07 |
| 1436316_at   | Kruppel-like factor 13                     | Klf13     | -2.15 | 5.14E-09 |
| 1458502_at   | ---                                        | ---       | -2.15 | 4.42E-05 |
| 1444777_at   | Retinoic acid induced 14                   | Rai14     | 2.15  | 3.74E-05 |
| 1458489_at   | ---                                        | ---       | -2.15 | 1.05E-03 |
| 1457465_at   | shroom family member 4                     | Shroom4   | 2.15  | 3.12E-06 |
| 1449901_a_at | mitogen-activated protein kinase kinase k  | Map3k6    | -2.15 | 1.61E-06 |
| 1454018_at   | tousled-like kinase 2 (Arabidopsis)        | Tlk2      | -2.15 | 4.32E-10 |
| 1444260_at   | ---                                        | ---       | 2.15  | 1.32E-07 |
| 1454897_at   | RIKEN cDNA 6330509M05 gene                 | 6330509M0 | 2.15  | 2.88E-06 |
| 1429171_a_at | non-SMC condensin I complex, subunit C     | Ncapg     | -2.15 | 3.18E-04 |
| 1449550_at   | myosin IC                                  | Myo1c     | -2.15 | 1.51E-06 |
| 1415886_at   | SH2 domain containing 3C                   | Sh2d3c    | 2.15  | 3.07E-06 |
| 1445264_at   | cation channel, sperm associated 2         | Catsper2  | 2.14  | 6.08E-07 |
| 1458054_at   | exostoses (multiple) 1                     | Ext1      | 2.14  | 2.27E-04 |
| 1428510_at   | latrophilin 1                              | Lphn1     | -2.14 | 8.00E-07 |
| 1441370_at   | Transmembrane and coiled coil domains      | Tmcc1     | 2.14  | 3.49E-05 |
| 1452613_at   | ubiquinol-cytochrome c reductase, compl    | Uqcrq     | -2.14 | 4.18E-06 |
| 1422016_a_at | centromere protein H                       | Cenph     | -2.14 | 2.57E-07 |
| 1455548_at   | discs, large homolog-associated protein 4  | Dlgap4    | 2.14  | 2.77E-08 |
| 1419297_at   | histocompatibility 2, O region alpha locu  | H2-Oa     | 2.14  | 6.84E-07 |
| 1439356_at   | flightless I homolog (Drosophila)          | Flii      | -2.14 | 7.42E-05 |
| 1439654_at   | predicted gene 7111                        | Gm7111    | 2.14  | 1.55E-05 |
| 1420682_at   | cholinergic receptor, nicotinic, beta poly | Chrnb1    | 2.14  | 4.81E-05 |
| 1426565_at   | insulin-like growth factor I receptor      | Igf1r     | -2.14 | 7.24E-12 |
| 1440273_at   | ---                                        | ---       | -2.14 | 2.11E-06 |
| 1416379_at   | pannexin 1                                 | Panx1     | -2.14 | 5.31E-06 |
| 1420691_at   | interleukin 2 receptor, alpha chain        | Il2ra     | 2.14  | 1.10E-06 |
| 1460553_at   | RIKEN cDNA 1700025K23 gene                 | 1700025K2 | 2.13  | 1.00E-06 |
| 1459193_at   | ---                                        | ---       | 2.13  | 7.25E-05 |
| 1440929_at   | Gametogenetin binding protein 2            | Ggnbp2    | -2.13 | 9.14E-05 |
| 1430735_at   | protein associated with topoisomerase II   | Patl2     | -2.13 | 5.59E-05 |
| 1442885_at   | SREBF chaperone                            | Scap      | 2.13  | 2.16E-04 |
| 1434069_at   | phosphatidylinositol-3,4,5-trisphosphate-  | Prex1     | 2.13  | 4.87E-07 |
| 1453049_at   | small VCP/p97-interacting protein          | Svip      | -2.13 | 1.40E-04 |
| 1424011_at   | aquaporin 9                                | Aqp9      | 2.13  | 1.87E-08 |
| 1453771_at   | GULP, engulfment adaptor PTB domain        | Gulp1     | -2.13 | 1.81E-05 |
| 1434962_x_at | chemokine (C-C motif) ligand 27A           | Ccl27a    | 2.13  | 2.41E-06 |
| 1457110_at   | pantothenate kinase 1                      | Pank1     | -2.13 | 1.72E-06 |
| 1459276_at   | RIKEN cDNA A530088E08 gene                 | A530088E0 | 2.13  | 9.59E-08 |



|              |                                           |            |       |          |
|--------------|-------------------------------------------|------------|-------|----------|
| 1418738_at   | sodium channel, voltage-gated, type I, be | Scn1b      | 2.13  | 8.50E-07 |
| 1423170_at   | TAF7 RNA polymerase II, TATA box bi       | Taf7       | -2.13 | 1.50E-04 |
| 1455425_at   | tet oncogene 1                            | Tet1       | -2.13 | 2.51E-05 |
| 1422924_at   | tumor necrosis factor (ligand) superfamil | Tnfsf9     | 2.13  | 6.31E-07 |
| 1452487_x_at | paired-Ig-like receptor A2                | Pira2      | 2.13  | 1.07E-05 |
| 1452123_s_at | FERM domain containing 4B                 | Frm4b      | -2.13 | 1.43E-07 |
| 1451969_s_at | poly (ADP-ribose) polymerase family, m    | Parp3      | 2.13  | 1.50E-07 |
| 1439125_at   | ---                                       | ---        | 2.13  | 1.21E-05 |
| 1435733_x_at | ribonuclease H2, subunit C                | Rnaseh2c   | -2.13 | 7.11E-07 |
| 1442605_at   | ---                                       | ---        | -2.13 | 7.93E-05 |
| 1434106_at   | EPM2A (laforin) interacting protein 1     | Epm2aip1   | -2.13 | 4.31E-05 |
| 1444186_at   | alanine-glyoxylate aminotransferase 2-lik | Agxt2l2    | -2.12 | 1.88E-05 |
| 1448417_at   | ninjurin 1                                | Ninj1      | -2.12 | 1.31E-07 |
| 1432361_a_at | centromere protein P                      | Cenpp      | -2.12 | 7.75E-05 |
| 1448298_at   | tyrosine kinase, non-receptor, 2          | Tnk2       | -2.12 | 9.36E-06 |
| 1424560_at   | proline-serine-threonine phosphatase-inte | Pstpip1    | 2.12  | 6.06E-06 |
| 1445884_at   | ---                                       | ---        | 2.12  | 2.80E-04 |
| 1441807_s_at | ---                                       | ---        | -2.12 | 5.74E-05 |
| 1435229_at   | GRAM domain containing 1B                 | Gramd1b    | 2.12  | 3.33E-07 |
| 1439467_at   | ---                                       | ---        | 2.12  | 2.45E-07 |
| 1426680_at   | selenoprotein N, 1                        | Sepn1      | 2.12  | 6.23E-10 |
| 1448886_at   | GATA binding protein 3                    | Gata3      | 2.12  | 1.06E-08 |
| 1435325_at   | ubiquitin specific peptidase 46           | Usp46      | -2.12 | 1.30E-06 |
| 1448611_at   | WW, C2 and coiled-coil domain containi    | Wwc2       | -2.12 | 2.63E-05 |
| 1443683_at   | ---                                       | ---        | 2.12  | 4.65E-05 |
| 1422444_at   | integrin alpha 6                          | Itga6      | 2.12  | 3.71E-05 |
| 1420710_at   | reticuloendotheliosis oncogene            | Rel        | -2.12 | 1.03E-05 |
| 1422455_s_at | N-ethylmaleimide sensitive fusion protein | Nsf        | -2.12 | 1.45E-08 |
| 1438916_x_at | RIKEN cDNA 6720401G13 gene                | 6720401G1  | 2.12  | 1.31E-06 |
| 1439980_at   | DNA segment, Chr 14, ERATO Doi 725        | D14Ertd725 | -2.12 | 1.31E-07 |
| 1431386_s_at | membrane-bound transcription factor pep   | Mbtps1     | -2.12 | 1.65E-03 |
| 1427325_s_at | AT-hook transcription factor              | Akna       | 2.12  | 8.41E-06 |
| 1423813_at   | kinesin family member 22                  | Kif22      | -2.12 | 1.62E-04 |
| 1460020_at   | ankyrin repeat domain 11                  | Ankrd11    | -2.11 | 9.45E-07 |
| 1444462_at   | ---                                       | ---        | 2.11  | 9.94E-06 |
| 1455195_at   | ribosomal protein S24                     | Rps24      | 2.11  | 1.05E-06 |
| 1448749_at   | pleckstrin                                | Plek       | -2.11 | 1.30E-08 |
| 1444744_at   | ---                                       | ---        | 2.11  | 5.83E-04 |
| 1447105_at   | ---                                       | ---        | 2.11  | 2.17E-04 |
| 1430983_at   | protein disulfide isomerase associated 6  | Pdia6      | -2.11 | 8.05E-05 |
| 1448436_a_at | interferon regulatory factor 1            | Irf1       | 2.11  | 1.03E-07 |
| 1431840_at   | DENN/MADD domain containing 1C            | Dennd1c    | 2.11  | 5.29E-06 |
| 1454465_at   | RIKEN cDNA 5830435N06 gene                | 5830435N0  | -2.11 | 3.36E-07 |
| 1456653_a_at | methylenetetrahydrofolate dehydrogenase   | Mthfd1l    | -2.11 | 1.26E-04 |
| 1440394_at   | ---                                       | ---        | -2.11 | 4.72E-09 |
| 1442118_at   | ---                                       | ---        | 2.11  | 7.42E-09 |
| 1422536_at   | troponin I, cardiac 3                     | Tnni3      | -2.11 | 5.73E-05 |

|              |                                                    |            |       |          |
|--------------|----------------------------------------------------|------------|-------|----------|
| 1419712_at   | interleukin 3 receptor, alpha chain                | Il3ra      | 2.10  | 1.29E-06 |
| 1457589_at   | FAT tumor suppressor homolog 3 (Drosophila)        | Fat3       | -2.10 | 1.06E-07 |
| 1444155_at   | ninein                                             | Nin        | 2.10  | 2.51E-04 |
| 1423809_at   | transcription factor 19                            | Tcf19      | -2.10 | 4.44E-05 |
| 1444723_at   | RIKEN cDNA 6530418L21 gene                         | 6530418L21 | 2.10  | 5.53E-05 |
| 1428684_at   | RIKEN cDNA 1500001M20 gene                         | 1500001M20 | -2.10 | 3.85E-07 |
| 1427650_a_at | runt related transcription factor 1                | Runx1      | -2.10 | 7.93E-08 |
| 1423920_at   | non-SMC condensin I complex, subunit H             | Ncaph      | -2.10 | 1.00E-04 |
| 1442775_at   | ---                                                | ---        | 2.10  | 9.48E-05 |
| 1452382_at   | dynamamin 3, opposite strand                       | Dnm3os     | 2.10  | 1.25E-06 |
| 1436202_at   | metastasis associated lung adenocarcinoma          | Malat1     | -2.10 | 7.50E-06 |
| 1452315_at   | kinesin family member 11                           | Kif11      | -2.10 | 4.36E-04 |
| 1433899_x_at | TSC22 domain family, member 1                      | Tsc22d1    | 2.10  | 7.20E-08 |
| 1453196_a_at | 2'-5' oligoadenylate synthetase-like 2             | Oasl2      | 2.10  | 2.83E-06 |
| 1434748_at   | cytoskeleton associated protein 2                  | Ckap2      | -2.10 | 9.81E-07 |
| 1442134_at   | proline rich 11                                    | Prr11      | -2.10 | 3.55E-04 |
| 1435417_at   | expressed sequence AI464131                        | AI464131   | 2.10  | 9.16E-04 |
| 1457673_at   | cadherin 11 pseudogene                             | 2610005L07 | 2.10  | 3.35E-06 |
| 1441673_at   | expressed sequence C80120                          | C80120     | -2.10 | 1.72E-03 |
| 1453474_at   | abhydrolase domain containing 15                   | Abhd15     | -2.10 | 5.08E-07 |
| 1421598_at   | ---                                                | ---        | -2.10 | 4.04E-07 |
| 1458309_at   | ---                                                | ---        | 2.09  | 1.45E-05 |
| 1440986_at   | RNA polymerase II associated protein 1             | Rpap1      | 2.09  | 1.51E-05 |
| 1437122_at   | B-cell leukemia/lymphoma 2                         | Bcl2       | -2.09 | 1.38E-08 |
| 1432582_at   | RIKEN cDNA 3110054G05 gene                         | 3110054G05 | -2.09 | 1.55E-03 |
| 1439948_at   | cDNA sequence BC046401                             | BC046401   | 2.09  | 1.70E-07 |
| 1421375_a_at | S100 calcium binding protein A6 (calcyclin)        | S100a6     | 2.09  | 1.80E-07 |
| 1453368_at   | RIKEN cDNA 2310003H01 gene                         | 2310003H01 | 2.09  | 3.90E-04 |
| 1459961_a_at | Signal transducer and activator of transcription 3 | Stat3      | -2.09 | 8.06E-07 |
| 1449743_a_at | ---                                                | ---        | -2.09 | 6.30E-06 |
| 1459744_at   | CD53 antigen                                       | Cd53       | 2.09  | 4.24E-07 |
| 1447504_at   | ---                                                | ---        | -2.09 | 5.45E-05 |
| 1459913_at   | tumor necrosis factor (ligand) superfamily 10      | Tnfsf10    | 2.09  | 9.94E-05 |
| 1436605_at   | transketolase                                      | Tkt        | -2.09 | 1.61E-05 |
| 1417629_at   | proline dehydrogenase                              | Prodh      | -2.09 | 5.87E-05 |
| 1434715_at   | RIKEN cDNA 1600014C10 gene                         | 1600014C10 | 2.09  | 2.32E-06 |
| 1444203_at   | ---                                                | ---        | 2.09  | 2.25E-06 |
| 1421038_a_at | potassium intermediate/small conductance           | Kenn4      | 2.09  | 6.83E-07 |
| 1431582_at   | eukaryotic translation initiation factor 6         | Eif6       | -2.09 | 1.25E-06 |
| 1442629_at   | ---                                                | ---        | -2.09 | 6.34E-05 |
| 1417220_at   | fumarylacetoacetate hydrolase                      | Fah        | 2.09  | 1.51E-08 |
| 1437496_at   | RIKEN cDNA 9330129D05 gene                         | 9330129D05 | 2.09  | 1.78E-05 |
| 1457252_x_at | phospholipase D2                                   | Plid2      | 2.08  | 6.21E-07 |
| 1441539_at   | ---                                                | ---        | 2.08  | 4.90E-07 |
| 1439114_at   | DEAD (Asp-Glu-Ala-Asp) box polypeptide             | Ddx60      | 2.08  | 6.73E-10 |
| 1425735_at   | MAP-kinase activating death domain                 | Madd       | 2.08  | 7.30E-06 |
| 1455040_s_at | NHS-like 2                                         | Nhsl2      | -2.08 | 3.69E-06 |

|              |                                                                  |           |       |          |
|--------------|------------------------------------------------------------------|-----------|-------|----------|
| 1446614_at   | Diacylglycerol kinase zeta                                       | Dgkz      | 2.08  | 1.07E-05 |
| 1457491_at   | Pleckstrin homology domain containing,                           | Plekha1   | 2.08  | 1.29E-06 |
| 1447119_at   | ---                                                              | ---       | 2.08  | 3.98E-04 |
| 1417142_at   | family with sequence similarity 120, mem                         | Fam120b   | 2.08  | 5.50E-07 |
| 1456655_at   | ---                                                              | ---       | 2.08  | 4.70E-06 |
| 1455702_at   | DDB1 and CUL4 associated factor 5                                | Dcaf5     | 2.08  | 3.00E-05 |
| 1441716_at   | ---                                                              | ---       | 2.08  | 5.12E-05 |
| 1439724_at   | resistance to inhibitors of cholinesterase                       | Ric8b     | -2.08 | 1.77E-06 |
| 1450424_a_at | interleukin 18 binding protein                                   | Il18bp    | 2.08  | 4.31E-05 |
| 1457020_at   | ---                                                              | ---       | 2.08  | 3.33E-05 |
| 1429682_at   | family with sequence similarity 46, mem                          | Fam46c    | -2.08 | 1.37E-06 |
| 1429359_s_at | RNA binding protein gene with multiple                           | Rbpms     | 2.08  | 5.06E-06 |
| 1429702_at   | RIKEN cDNA 2900072G11 gene                                       | 2900072G1 | -2.07 | 1.82E-05 |
| 1430765_at   | RIKEN cDNA 5730521K06 gene                                       | 5730521K0 | -2.07 | 1.62E-07 |
| 1449171_at   | Ttk protein kinase                                               | Ttk       | -2.07 | 2.24E-05 |
| 1458213_at   | ---                                                              | ---       | 2.07  | 1.36E-05 |
| 1439640_at   | ---                                                              | ---       | 2.07  | 3.68E-05 |
| 1425372_at   | DnaJ (Hsp40) homolog, subfamily C, me                            | Dnajc19   | 2.07  | 1.10E-04 |
| 1435479_at   | bone morphogenetic protein 7                                     | Bmp7      | -2.07 | 3.61E-06 |
| 1446567_at   | ---                                                              | ---       | -2.07 | 2.46E-05 |
| 1433935_at   | expressed sequence AU020206                                      | AU020206  | 2.07  | 8.27E-10 |
| 1446716_at   | ---                                                              | ---       | 2.07  | 4.51E-04 |
| 1422018_at   | human immunodeficiency virus type I en                           | Hivep2    | -2.07 | 6.39E-07 |
| 1446911_at   | ---                                                              | ---       | 2.07  | 3.61E-05 |
| 1449521_at   | CD93 antigen                                                     | Cd93      | 2.07  | 3.03E-07 |
| 1425769_x_at | chemokine-like factor                                            | Ck1f      | 2.07  | 1.80E-05 |
| 1448229_s_at | cyclin D2                                                        | Ccnd2     | 2.06  | 1.62E-07 |
| 1450905_at   | plexin C1                                                        | Plxnc1    | 2.06  | 1.12E-04 |
| 1460228_at   | upstream transcription factor 2                                  | Usf2      | -2.06 | 1.10E-06 |
| 1437209_at   | centrosomal protein 76                                           | Cep76     | -2.06 | 1.38E-06 |
| 1435832_at   | leucine rich repeat containing 4                                 | Lrrc4     | -2.06 | 1.61E-04 |
| 1456957_at   | ---                                                              | ---       | -2.06 | 1.76E-06 |
| 1433634_at   | interferon regulatory factor 2 binding pro                       | Irf2bp2   | -2.06 | 5.90E-07 |
| 1454876_at   | RAB23, member RAS oncogene family                                | Rab23     | 2.06  | 2.27E-04 |
| 1455143_at   | neuroigin 2                                                      | Nlgn2     | 2.06  | 9.70E-06 |
| 1440635_at   | palladin, cytoskeletal associated protein                        | Palld     | 2.06  | 6.64E-04 |
| 1448650_a_at | polymerase (DNA directed), epsilon                               | Pole      | -2.06 | 9.78E-04 |
| 1438331_at   | ---                                                              | ---       | 2.06  | 2.18E-05 |
| 1420876_a_at | septin 6                                                         | 40427     | 2.06  | 1.78E-07 |
| 1431592_a_at | SH3-domain kinase binding protein 1                              | Sh3kbp1   | -2.06 | 3.83E-07 |
| 1424181_at   | septin 6                                                         | 40427     | 2.06  | 7.83E-08 |
| 1421628_at   | interleukin 18 receptor 1                                        | Il18r1    | -2.06 | 2.51E-08 |
| 1451152_a_at | ATPase, Na <sup>+</sup> /K <sup>+</sup> transporting, beta 1 pol | Atp1b1    | 2.05  | 4.72E-04 |
| 1444224_at   | ---                                                              | ---       | -2.05 | 3.79E-07 |
| 1430345_at   | RIKEN cDNA 5530402H23 gene                                       | 5530402H2 | 2.05  | 1.11E-06 |
| 1434725_at   | GRAM domain containing 1C                                        | Gramd1c   | 2.05  | 9.47E-07 |
| 1418536_at   | histocompatibility 2, Q region locus 7                           | H2-Q7     | -2.05 | 2.44E-04 |

|              |                                                           |            |       |          |
|--------------|-----------------------------------------------------------|------------|-------|----------|
| 1443877_a_at | Rap guanine nucleotide exchange factor                    | Rapgef6    | -2.05 | 1.91E-04 |
| 1436447_at   | RIKEN cDNA A630026N12 gene                                | A630026N12 | 2.05  | 5.72E-06 |
| 1454850_at   | TBC1 domain family, member 10c                            | Tbc1d10c   | 2.05  | 2.54E-07 |
| 1434144_s_at | WDYHV motif containing 1                                  | Wdyhv1     | 2.05  | 1.86E-07 |
| 1434738_at   | threonyl-tRNA synthetase-like 2                           | Tarsl2     | -2.05 | 2.11E-06 |
| 1416332_at   | cold inducible RNA binding protein                        | Cirbp      | -2.05 | 1.26E-05 |
| 1419124_at   | major facilitator superfamily domain containing 1         | Mfsd6      | 2.05  | 1.50E-08 |
| 1420119_s_at | PHD finger protein 3                                      | Phf3       | -2.05 | 1.16E-05 |
| 1453141_at   | RIKEN cDNA 0610009L18 gene                                | 0610009L18 | 2.05  | 5.78E-06 |
| 1432033_at   | netrin G2                                                 | Ntng2      | 2.05  | 4.20E-04 |
| 1423414_at   | prostaglandin-endoperoxide synthase 1                     | Ptgs1      | -2.05 | 3.57E-06 |
| 1438680_at   | autism susceptibility candidate 2                         | Auts2      | -2.05 | 2.55E-07 |
| 1436177_at   | pleckstrin homology domain-containing, cytoplasmic        | Plekha2    | 2.05  | 3.82E-08 |
| 1416424_at   | perilipin 3                                               | Plin3      | 2.05  | 2.05E-06 |
| 1418286_a_at | ephrin B1                                                 | Efnb1      | -2.05 | 9.18E-06 |
| 1459944_at   | UTP11-like, U3 small nucleolar ribonucleoprotein          | Utp11l     | 2.05  | 3.87E-05 |
| 1428002_at   | serum amyloid A-like 1                                    | Saal1      | -2.05 | 1.64E-06 |
| 1441516_a_at | RIKEN cDNA C130050O18 gene                                | C130050O18 | 2.05  | 2.17E-05 |
| 1440048_at   | SWI/SNF related, matrix associated, actin dependent       | Smarca5    | -2.05 | 2.07E-06 |
| 1449331_a_at | receptor-associated protein of the synapse                | Rapsn      | -2.05 | 9.08E-09 |
| 1453781_at   | ---                                                       | ---        | -2.05 | 3.70E-05 |
| 1436448_a_at | prostaglandin-endoperoxide synthase 1                     | Ptgs1      | -2.05 | 5.72E-07 |
| 1429001_at   | pirin                                                     | Pir        | 2.04  | 3.01E-05 |
| 1446834_at   | Cathepsin C                                               | Ctsc       | -2.04 | 3.79E-04 |
| 1428976_at   | thymopoietin                                              | Tmpo       | -2.04 | 3.92E-09 |
| 1421309_at   | O-6-methylguanine-DNA methyltransferase                   | Mgmt       | 2.04  | 7.14E-08 |
| 1445765_at   | RIKEN cDNA 9430011C21 gene                                | 9430011C21 | -2.04 | 9.36E-04 |
| 1453920_a_at | motile sperm domain containing 2                          | Mospd2     | 2.04  | 5.94E-05 |
| 1443051_at   | ---                                                       | ---        | 2.04  | 9.46E-06 |
| 1427293_a_at | autism susceptibility candidate 2                         | Auts2      | -2.04 | 9.74E-07 |
| 1418709_at   | cytochrome c oxidase, subunit VIIa 1                      | Cox7a1     | -2.04 | 1.51E-03 |
| 1424898_at   | solute carrier family 10 (sodium/bile acid cotransporter) | Slc10a1    | -2.04 | 1.68E-05 |
| 1437119_at   | endoplasmic reticulum (ER) to nucleus signal              | Ern1       | 2.04  | 2.30E-10 |
| 1458306_at   | phosphatidylinositol glycan anchor biosynthesis           | Pigz       | 2.04  | 1.63E-05 |
| 1449469_at   | polycystic kidney disease 2-like 2                        | Pkd2l2     | 2.04  | 1.83E-05 |
| 1458351_s_at | kelch-like 2, Mayven (Drosophila)                         | Klhl2      | -2.04 | 5.94E-05 |
| 1443490_at   | DNA segment, Chr 3, ERATO Doi 34, expressed               | D3Ertd34e  | -2.04 | 5.44E-04 |
| 1456064_at   | expressed sequence AI504432                               | AI504432   | 2.04  | 8.13E-07 |
| 1442436_at   | fructosamine 3 kinase                                     | Fn3k       | -2.04 | 7.77E-06 |
| 1444615_x_at | runt-related transcription factor 1; transcription        | Runx1t1    | 2.04  | 2.06E-04 |
| 1418043_at   | ATP-binding cassette, sub-family C (CFTR)                 | Abcc5      | -2.04 | 1.19E-06 |
| 1416940_at   | peptidylprolyl isomerase F (cyclophilin F)                | Ppif       | -2.04 | 1.22E-06 |
| 1448096_at   | 2-oxoglutarate and iron-dependent oxygenase               | Ogfod1     | 2.04  | 3.20E-06 |
| 1422349_at   | chemokine (C-C motif) receptor 1-like 1                   | Ccr11      | -2.04 | 2.61E-04 |
| 1458677_at   | ectonucleoside triphosphate diphosphohydrolase            | Entpd5     | -2.04 | 1.81E-04 |
| 1444820_at   | ---                                                       | ---        | 2.04  | 2.14E-04 |
| 1428122_s_at | family with sequence similarity 125, member               | Fam125b    | -2.04 | 1.40E-05 |

|              |                                          |             |       |          |
|--------------|------------------------------------------|-------------|-------|----------|
| 1441476_at   | suppressor of cytokine signaling 2       | Socs2       | 2.04  | 1.25E-06 |
| 1427127_x_at | heat shock protein 1B                    | Hspa1b      | 2.03  | 8.32E-04 |
| 1424664_at   | cDNA sequence BC017647                   | BC017647    | 2.03  | 2.30E-06 |
| 1424832_at   | CD300 molecule-like family member d      | Cd300ld     | 2.03  | 1.24E-03 |
| 1424942_a_at | myelocytomatosis oncogene                | Myc         | -2.03 | 1.20E-06 |
| 1439608_at   | ---                                      | ---         | -2.03 | 3.35E-06 |
| 1428033_at   | predicted gene 4979                      | Gm4979      | 2.03  | 1.43E-07 |
| 1434969_at   | CUGBP, Elav-like family member 5         | Celf5       | 2.03  | 5.37E-04 |
| 1439929_at   | ---                                      | ---         | -2.03 | 3.84E-05 |
| 1429156_at   | RIKEN cDNA 2610036L11 gene               | 2610036L11  | -2.03 | 8.99E-08 |
| 1416411_at   | glutathione S-transferase, mu 2          | Gstm2       | 2.03  | 2.60E-04 |
| 1444613_at   | ---                                      | ---         | 2.03  | 1.72E-04 |
| 1444999_at   | expressed sequence C77651                | C77651      | 2.03  | 2.53E-05 |
| 1444917_at   | ---                                      | ---         | 2.03  | 2.74E-04 |
| 1418203_at   | phorbol-12-myristate-13-acetate-induced  | Pmaip1      | 2.03  | 2.32E-05 |
| 1458279_at   | ---                                      | ---         | 2.03  | 1.96E-04 |
| 1458649_at   | expressed sequence AI662245              | AI662245    | -2.03 | 5.18E-04 |
| 1456372_at   | ---                                      | ---         | 2.03  | 1.35E-04 |
| 1425921_a_at | RIKEN cDNA 1810055G02 gene               | 1810055G02  | -2.03 | 1.43E-05 |
| 1435263_at   | transmembrane protein 106A               | Tmem106a    | 2.03  | 1.34E-05 |
| 1420135_at   | ---                                      | ---         | -2.03 | 1.39E-05 |
| 1458188_at   | ---                                      | ---         | 2.03  | 4.90E-04 |
| 1420902_at   | ST6 (alpha-N-acetyl-neuraminyl-2,3-beta  | St6galnac3  | -2.03 | 8.00E-04 |
| 1445618_at   | ---                                      | ---         | 2.03  | 3.17E-05 |
| 1439945_at   | zinc finger protein 449                  | Zfp449      | 2.03  | 1.36E-05 |
| 1459105_at   | ---                                      | ---         | -2.03 | 1.92E-07 |
| 1453596_at   | inhibitor of DNA binding 2               | Id2         | -2.02 | 2.46E-05 |
| 1441228_at   | apolipoprotein L domain containing 1     | Apold1      | -2.02 | 2.31E-04 |
| 1440404_at   | ---                                      | ---         | 2.02  | 2.33E-04 |
| 1429949_at   | RIKEN cDNA 6530415H11 gene               | 6530415H11  | -2.02 | 4.80E-05 |
| 1456809_at   | ---                                      | ---         | 2.02  | 5.79E-05 |
| 1456216_at   | ---                                      | ---         | -2.02 | 1.11E-06 |
| 1416097_at   | leucine rich repeat containing 4         | Lrrc4       | -2.02 | 9.71E-07 |
| 1460375_at   | tRNA methyltransferase 11-2 homolog (S   | Trmt112     | -2.02 | 6.92E-06 |
| 1459344_at   | RIKEN cDNA 9630019E01 gene               | 9630019E01  | -2.02 | 5.72E-05 |
| 1455735_at   | adaptor-related protein complex AP-1, si | Ap1s3       | 2.02  | 1.17E-06 |
| 1422261_a_at | similar to mutS homolog 3 /// mutS homod | LOC100046   | -2.02 | 5.65E-04 |
| 1429963_at   | mitogen-activated protein kinase 6       | Mapk6       | -2.02 | 2.21E-05 |
| 1457732_at   | ---                                      | ---         | 2.02  | 2.05E-06 |
| 1441896_x_at | ---                                      | ---         | 2.02  | 1.19E-05 |
| 1420464_s_at | predicted pseudogene 10693 /// predicted | Gm10693 /// | 2.02  | 4.98E-06 |
| 1424143_a_at | chromatin licensing and DNA replication  | Cdt1        | -2.02 | 1.91E-04 |
| 1436798_at   | Ribosomal protein L9                     | Rpl9        | -2.02 | 1.76E-06 |
| 1434070_at   | jagged 1                                 | Jag1        | -2.02 | 1.47E-05 |
| 1416012_at   | EH-domain containing 1                   | Ehd1        | 2.02  | 8.09E-04 |
| 1458183_at   | RIKEN cDNA 2810039B14 gene               | 2810039B14  | 2.02  | 3.54E-06 |
| 1452319_at   | zinc finger protein 82                   | Zfp82       | 2.02  | 2.63E-05 |

|              |                                              |              |       |          |
|--------------|----------------------------------------------|--------------|-------|----------|
| 1449187_at   | platelet derived growth factor, alpha        | Pdgfa        | 2.01  | 3.14E-06 |
| 1418367_x_at | histone cluster 2, H2aa1 /// histone cluste  | Hist2h2aa1   | -2.01 | 9.10E-04 |
| 1438412_at   | ---                                          | ---          | -2.01 | 1.82E-04 |
| 1439755_at   | signal-induced proliferation-associated 1    | Sipa111      | 2.01  | 4.90E-05 |
| 1455727_at   | zinc finger (CCCH type), RNA binding n       | Zrsr2        | -2.01 | 4.49E-07 |
| 1426599_a_at | solute carrier family 2 (facilitated glucose | Slc2a1       | -2.01 | 8.29E-10 |
| 1449005_at   | solute carrier family 16 (monocarboxylic     | Slc16a3      | -2.01 | 7.60E-04 |
| 1434181_at   | fermitin family homolog 2 (Drosophila)       | Fermt2       | 2.01  | 8.28E-06 |
| 1436638_at   | RIKEN cDNA 6720401G13 gene                   | 6720401G1    | 2.01  | 1.02E-04 |
| 1437724_x_at | phosphatidylinositol transfer protein, me    | Pitpm1       | 2.01  | 1.62E-07 |
| 1453424_at   | FYVE and coiled-coil domain containing       | Fyco1        | 2.01  | 2.56E-06 |
| 1447532_at   | ---                                          | ---          | 2.01  | 2.51E-05 |
| 1437687_x_at | FK506 binding protein 9                      | Fkbp9        | -2.01 | 2.11E-04 |
| 1416842_at   | glutathione S-transferase, mu 5              | Gstm5        | 2.01  | 2.38E-05 |
| 1416987_at   | elongation protein 4 homolog (S. cerevisi    | Elp4         | -2.01 | 3.11E-04 |
| 1459326_at   | DNA segment, Chr 9, ERATO Doi 256, 4         | D9Ertd256e   | 2.01  | 4.62E-04 |
| 1423169_at   | TAF7 RNA polymerase II, TATA box bi          | Taf7         | -2.01 | 1.63E-04 |
| 1443702_at   | microtubule-associated protein 4             | Mtap4        | 2.01  | 4.74E-05 |
| 1434052_at   | expressed sequence AI593442                  | AI593442     | 2.01  | 6.62E-09 |
| 1445298_at   | ---                                          | ---          | -2.01 | 5.67E-04 |
| 1448765_at   | Fyn proto-oncogene                           | Fyn          | 2.01  | 1.24E-06 |
| 1444400_at   | retinoblastoma 1                             | Rb1          | -2.01 | 1.93E-06 |
| 1417926_at   | non-SMC condensin II complex, subunit        | Ncapg2       | -2.00 | 1.09E-07 |
| 1449586_at   | plakophilin 1                                | Pkp1         | -2.00 | 1.54E-03 |
| 1447175_at   | ---                                          | ---          | -2.00 | 4.70E-04 |
| 1429363_at   | vacuolar protein sorting 37A (yeast)         | Vps37a       | 2.00  | 1.64E-08 |
| 1436808_x_at | minichromosome maintenance deficient 5       | Mcm5         | -2.00 | 1.49E-03 |
| 1451655_at   | schlafen 8                                   | Slfn8        | 2.00  | 1.40E-08 |
| 1420685_at   | GRB2-related adaptor protein 2 /// simila    | Grap2 /// LC | -2.00 | 2.82E-05 |
| 1416407_at   | phosphoprotein enriched in astrocytes 15     | Pea15a       | 2.00  | 3.81E-07 |
| 1445169_at   | ---                                          | ---          | -2.00 | 2.11E-06 |
| 1452610_at   | zinc finger with KRAB and SCAN domain        | Zkscan14     | -2.00 | 1.03E-06 |
| 1444651_at   | hypothetical LOC553089                       | LOC553089    | 2.00  | 2.11E-07 |
| 1415945_at   | minichromosome maintenance deficient 5       | Mcm5         | -2.00 | 1.10E-05 |
| 1430356_at   | RIKEN cDNA 2210402A03 gene                   | 2210402A0    | 2.00  | 8.90E-07 |
